# Supplementary material for: The Role of the Size and Location of the Tumors and of the Vertebral Anatomy in Determining the Structural Stability of the Metastatically Involved Spine: a Finite Element Study
Source: PubMed Central journal article supplement — Transl Oncol. 2018 Mar 28;11(3):639–46. doi: 10.1016/j.tranon.2018.03.002 (PMC6054594; doi:10.1016/j.tranon.2018.03.002), 2018-03-28

S3: Effect of the tumor size (in mm) in determining the average axial displacement

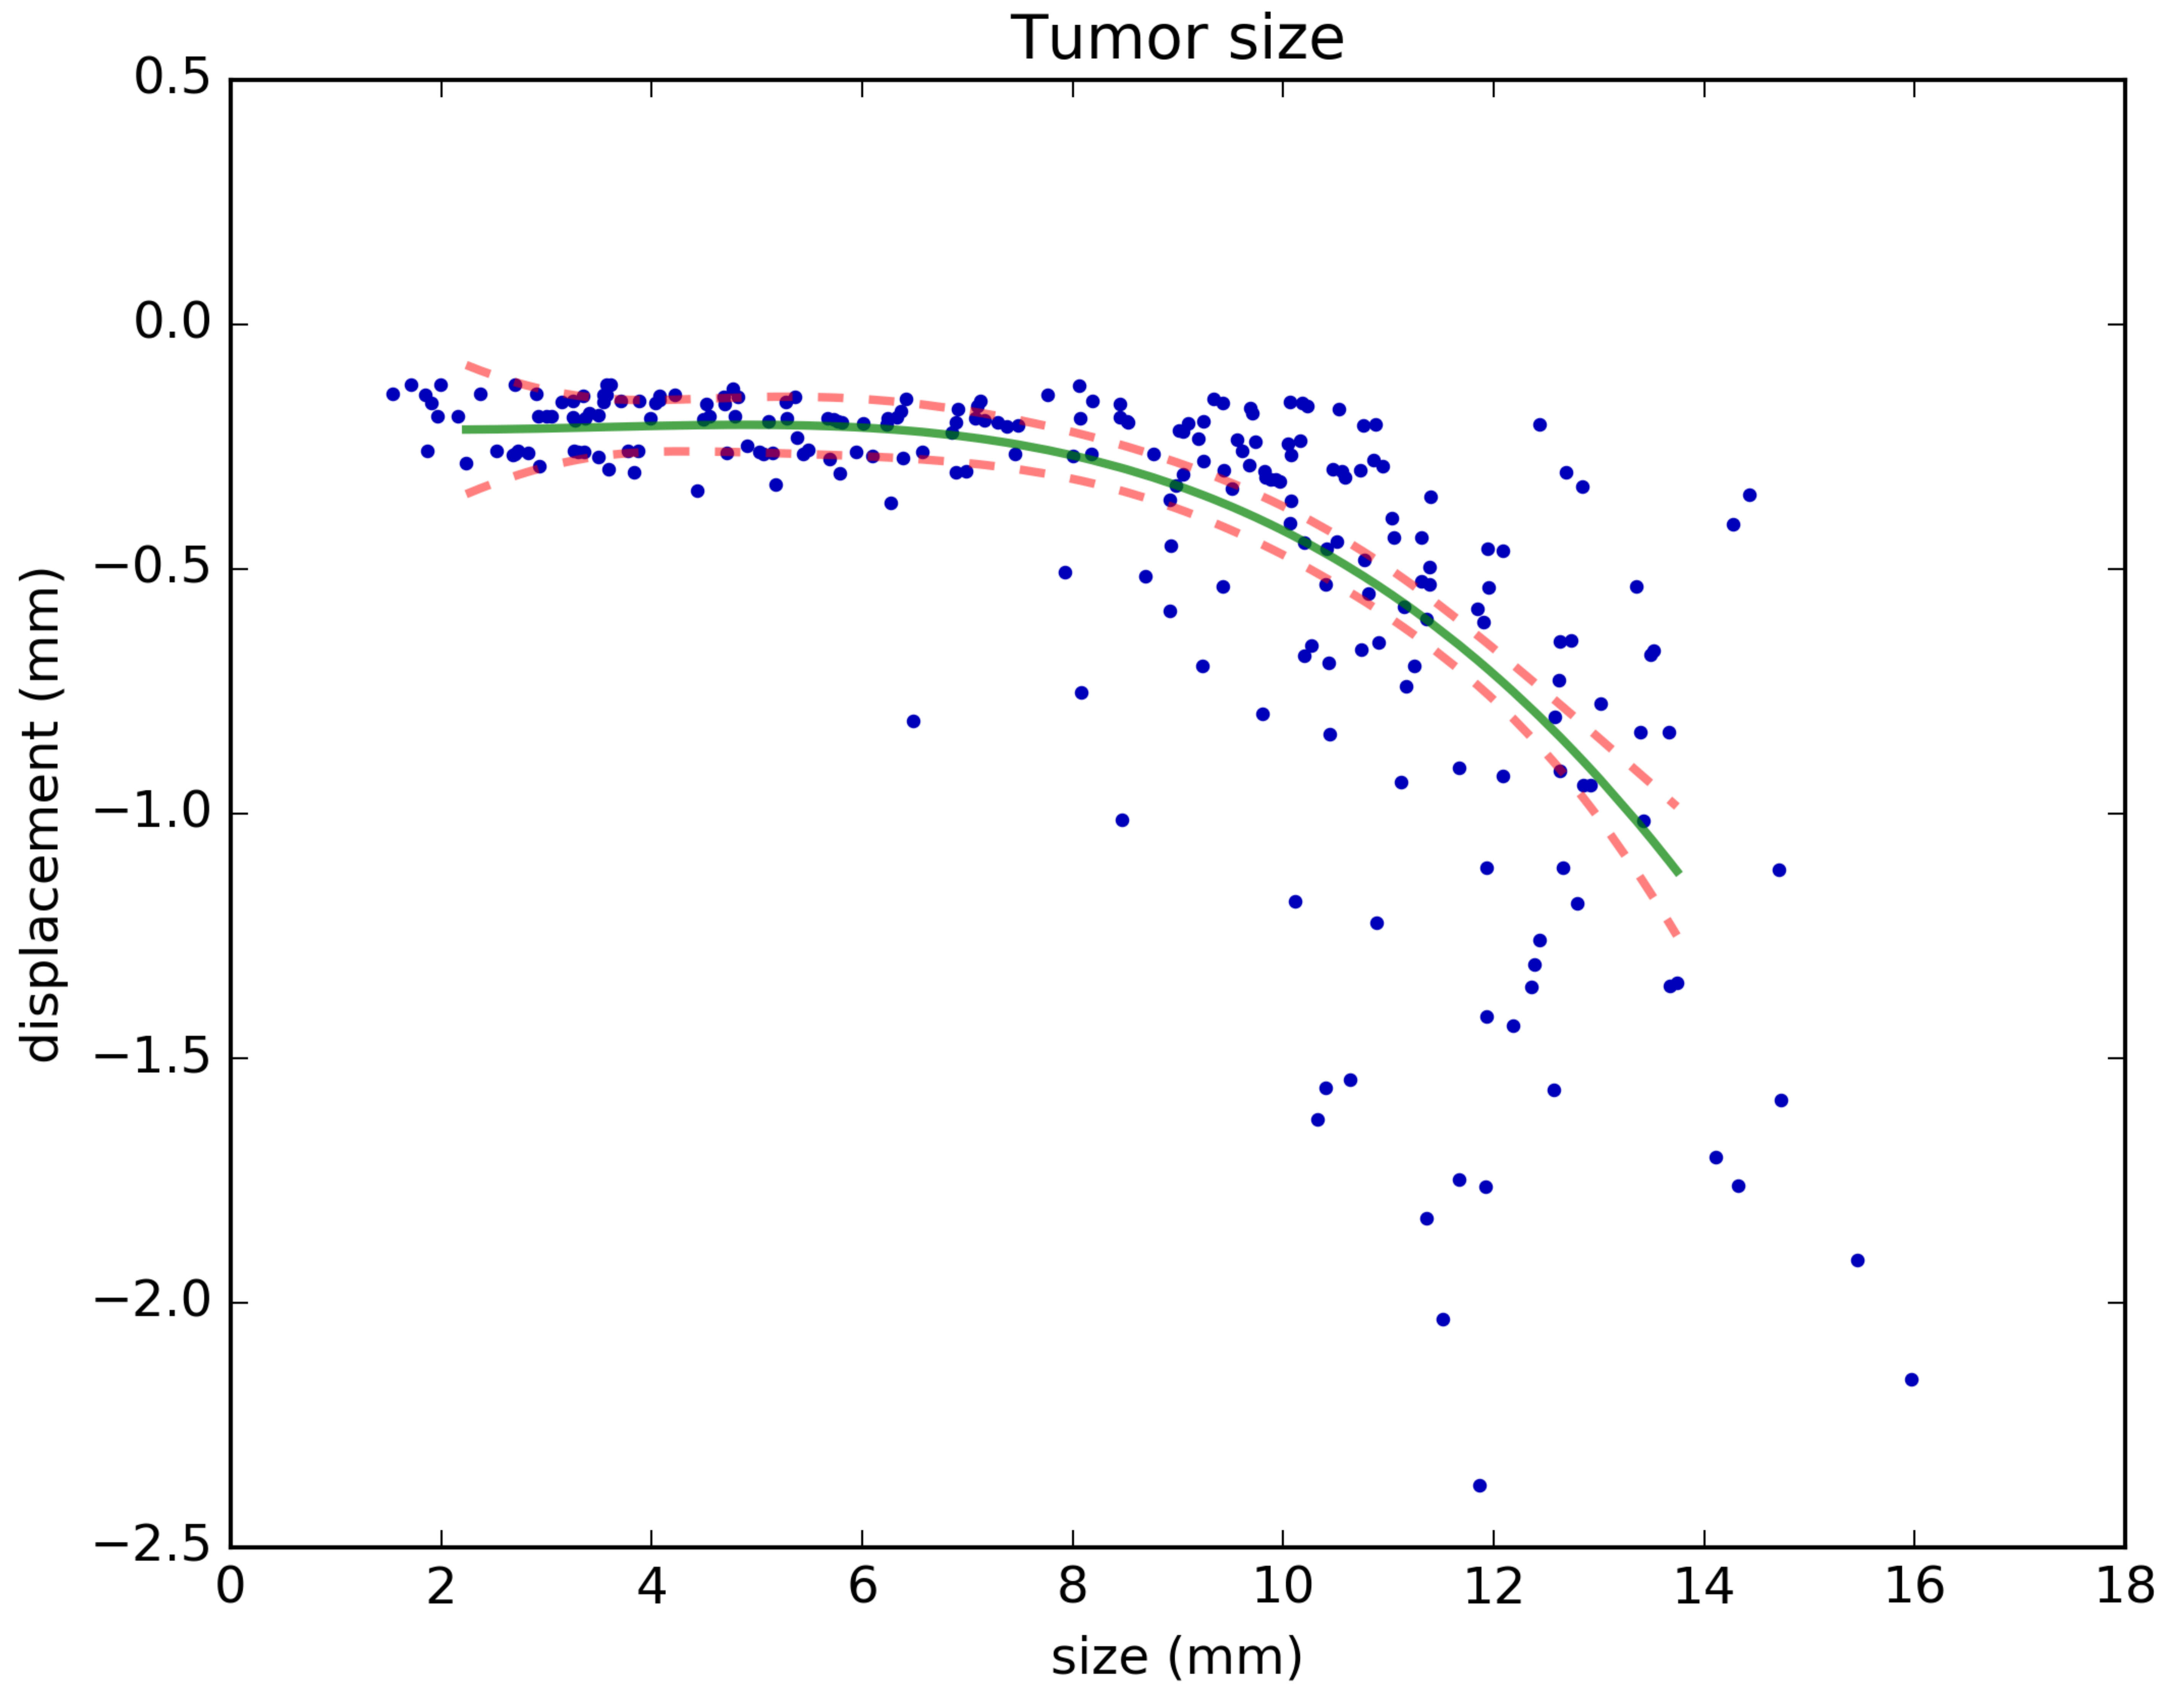

S3: Effect of the tumor size (in mm<sup>3</sup>) in determining the average axial displacement

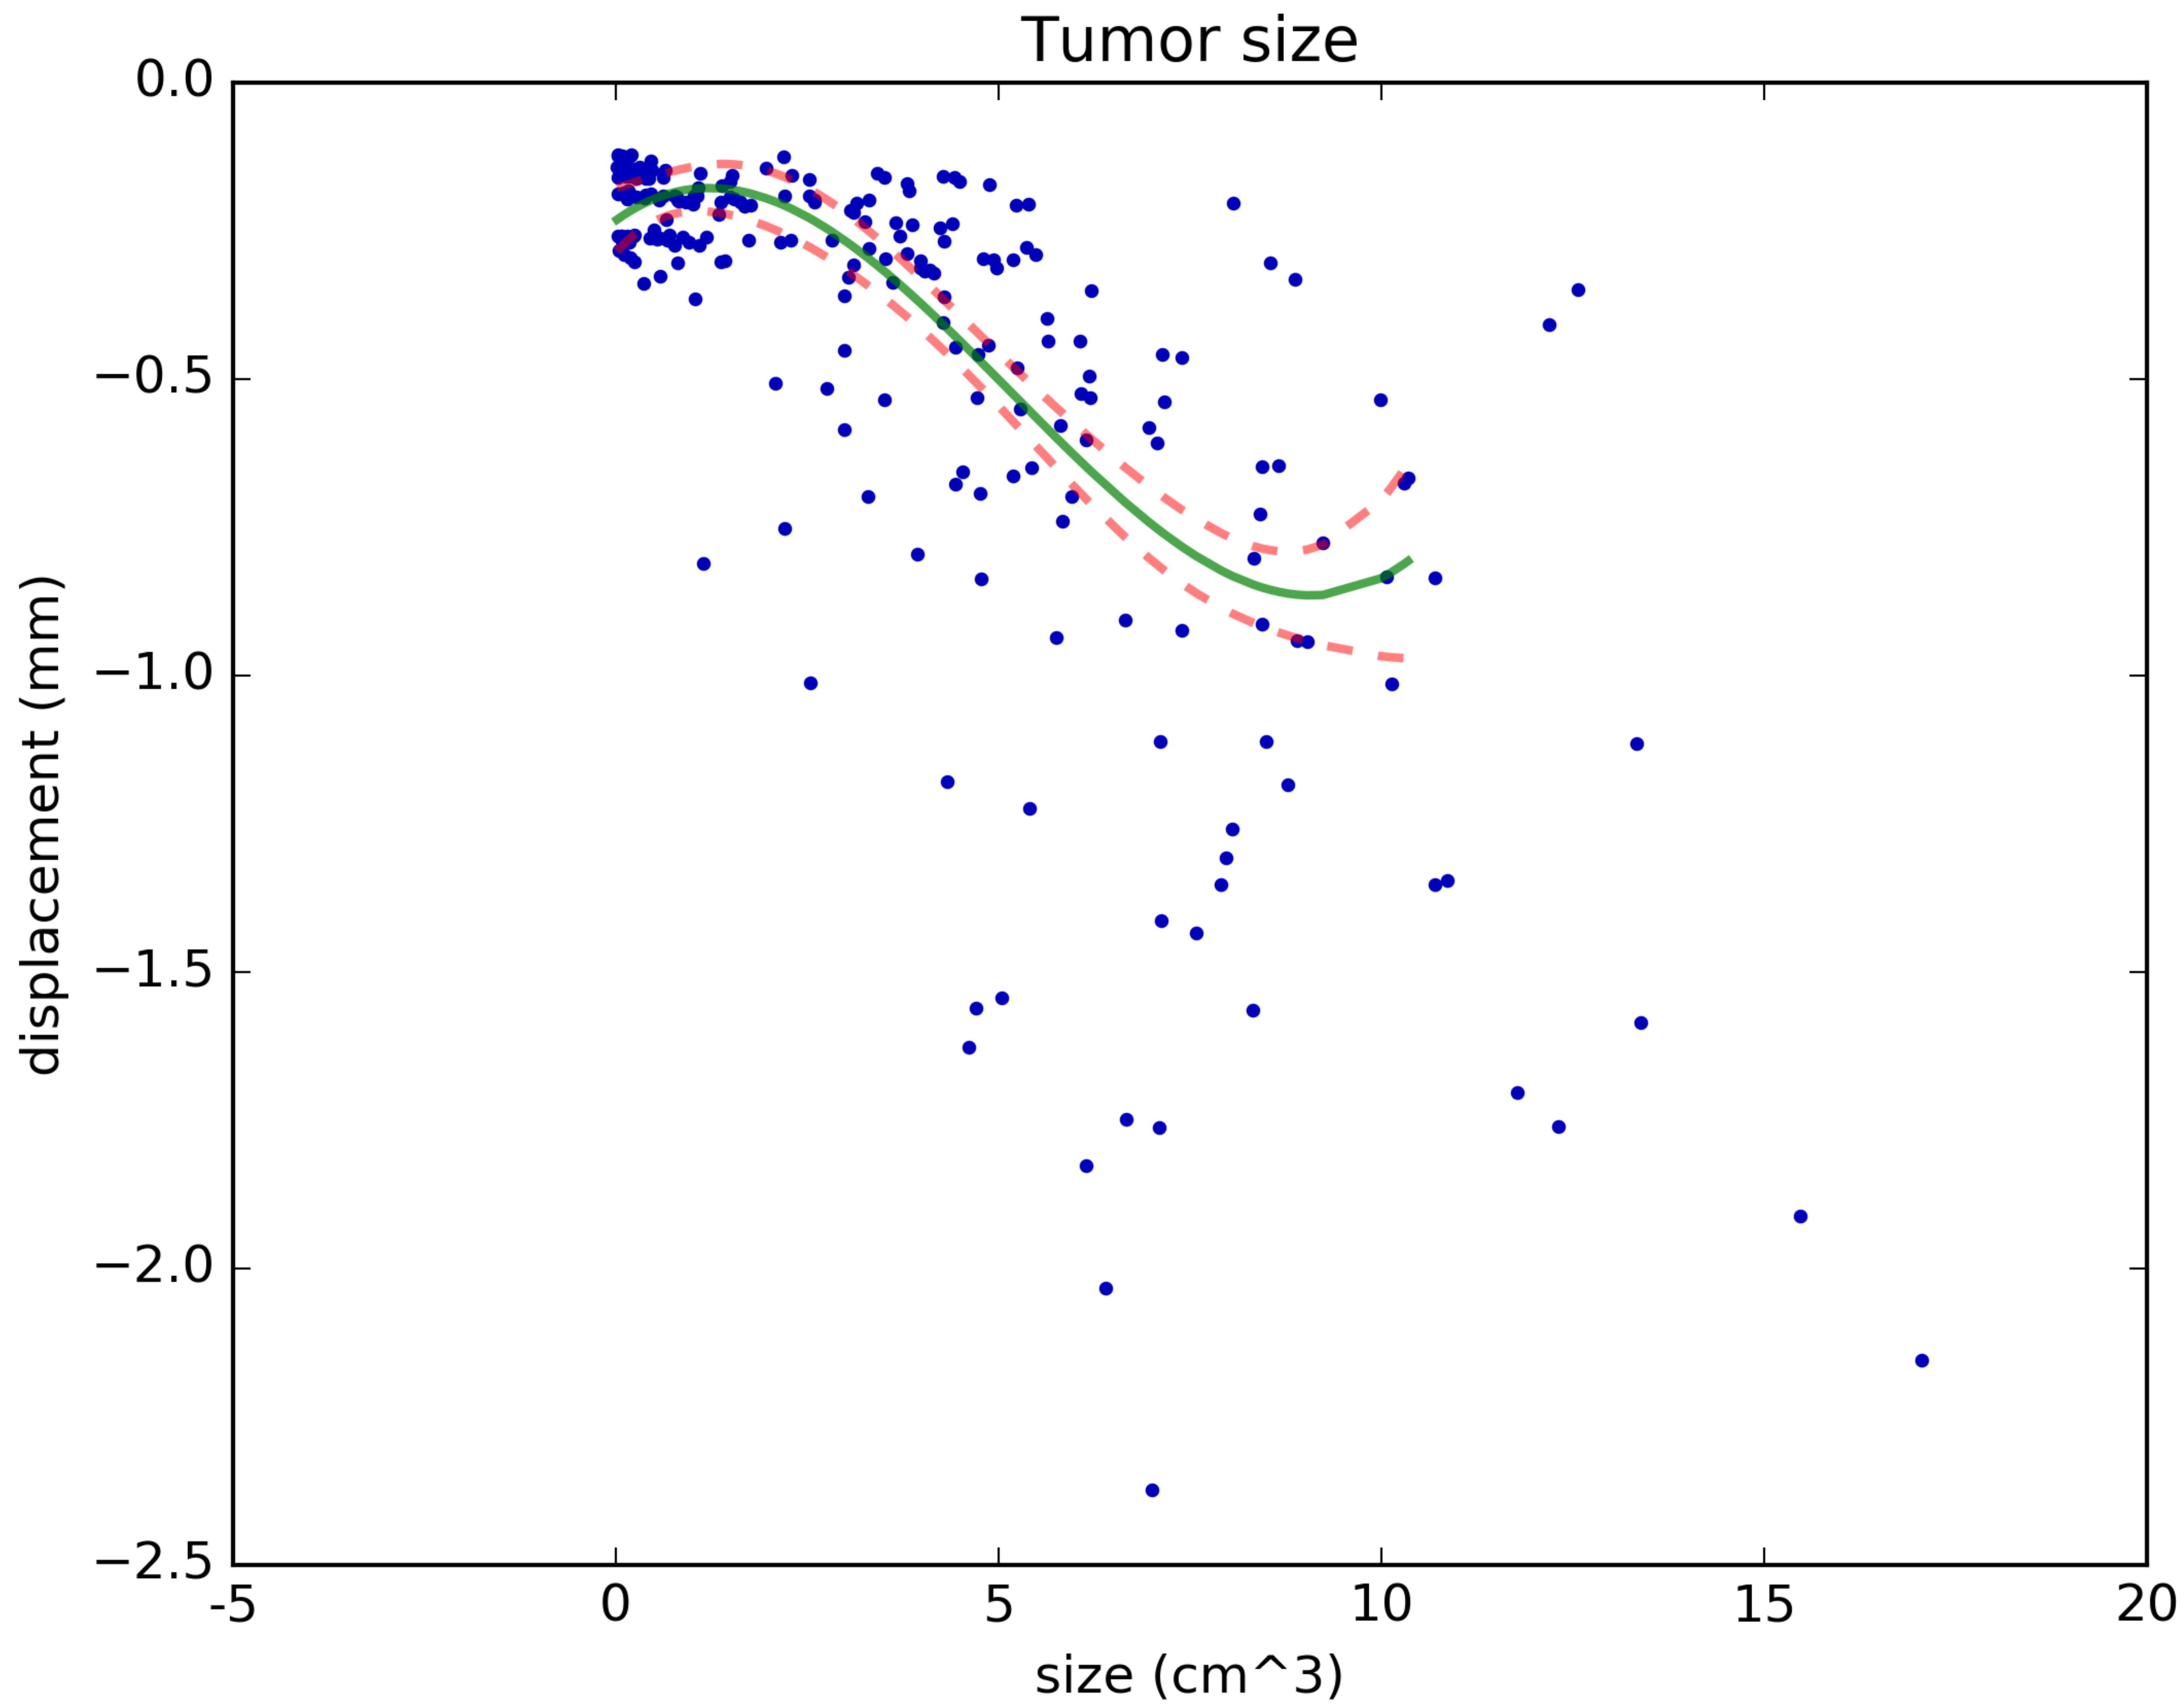

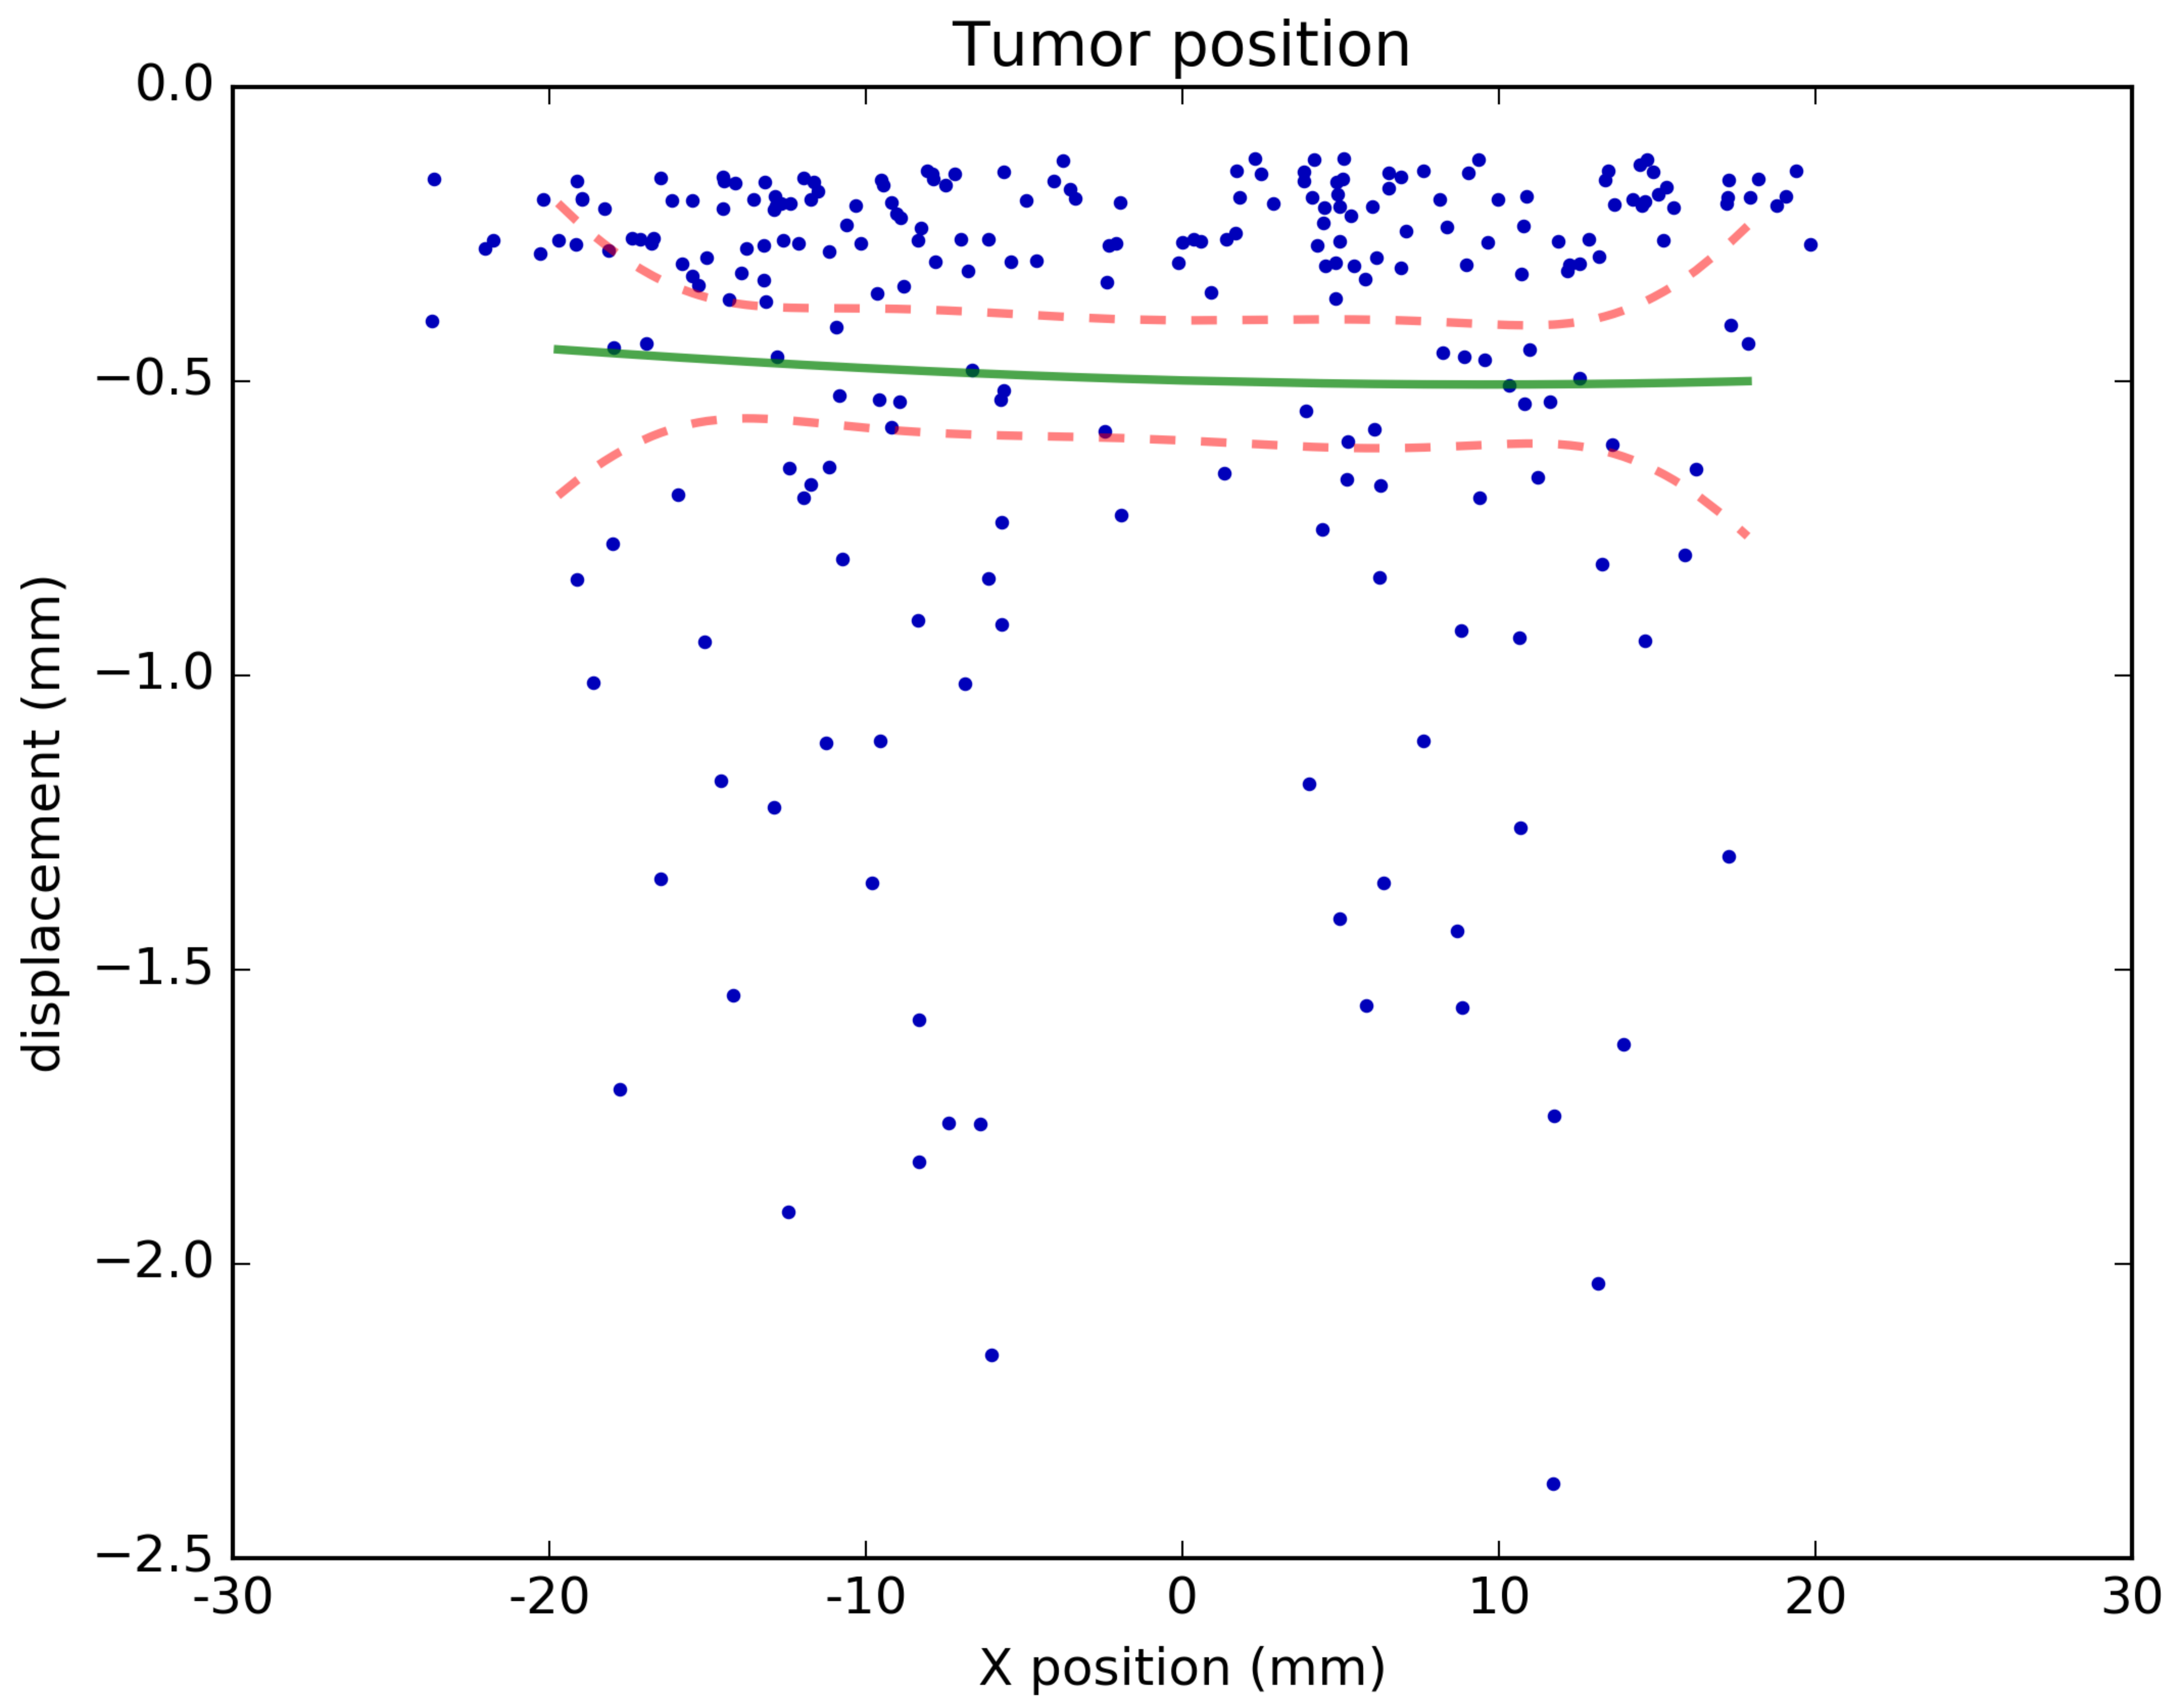

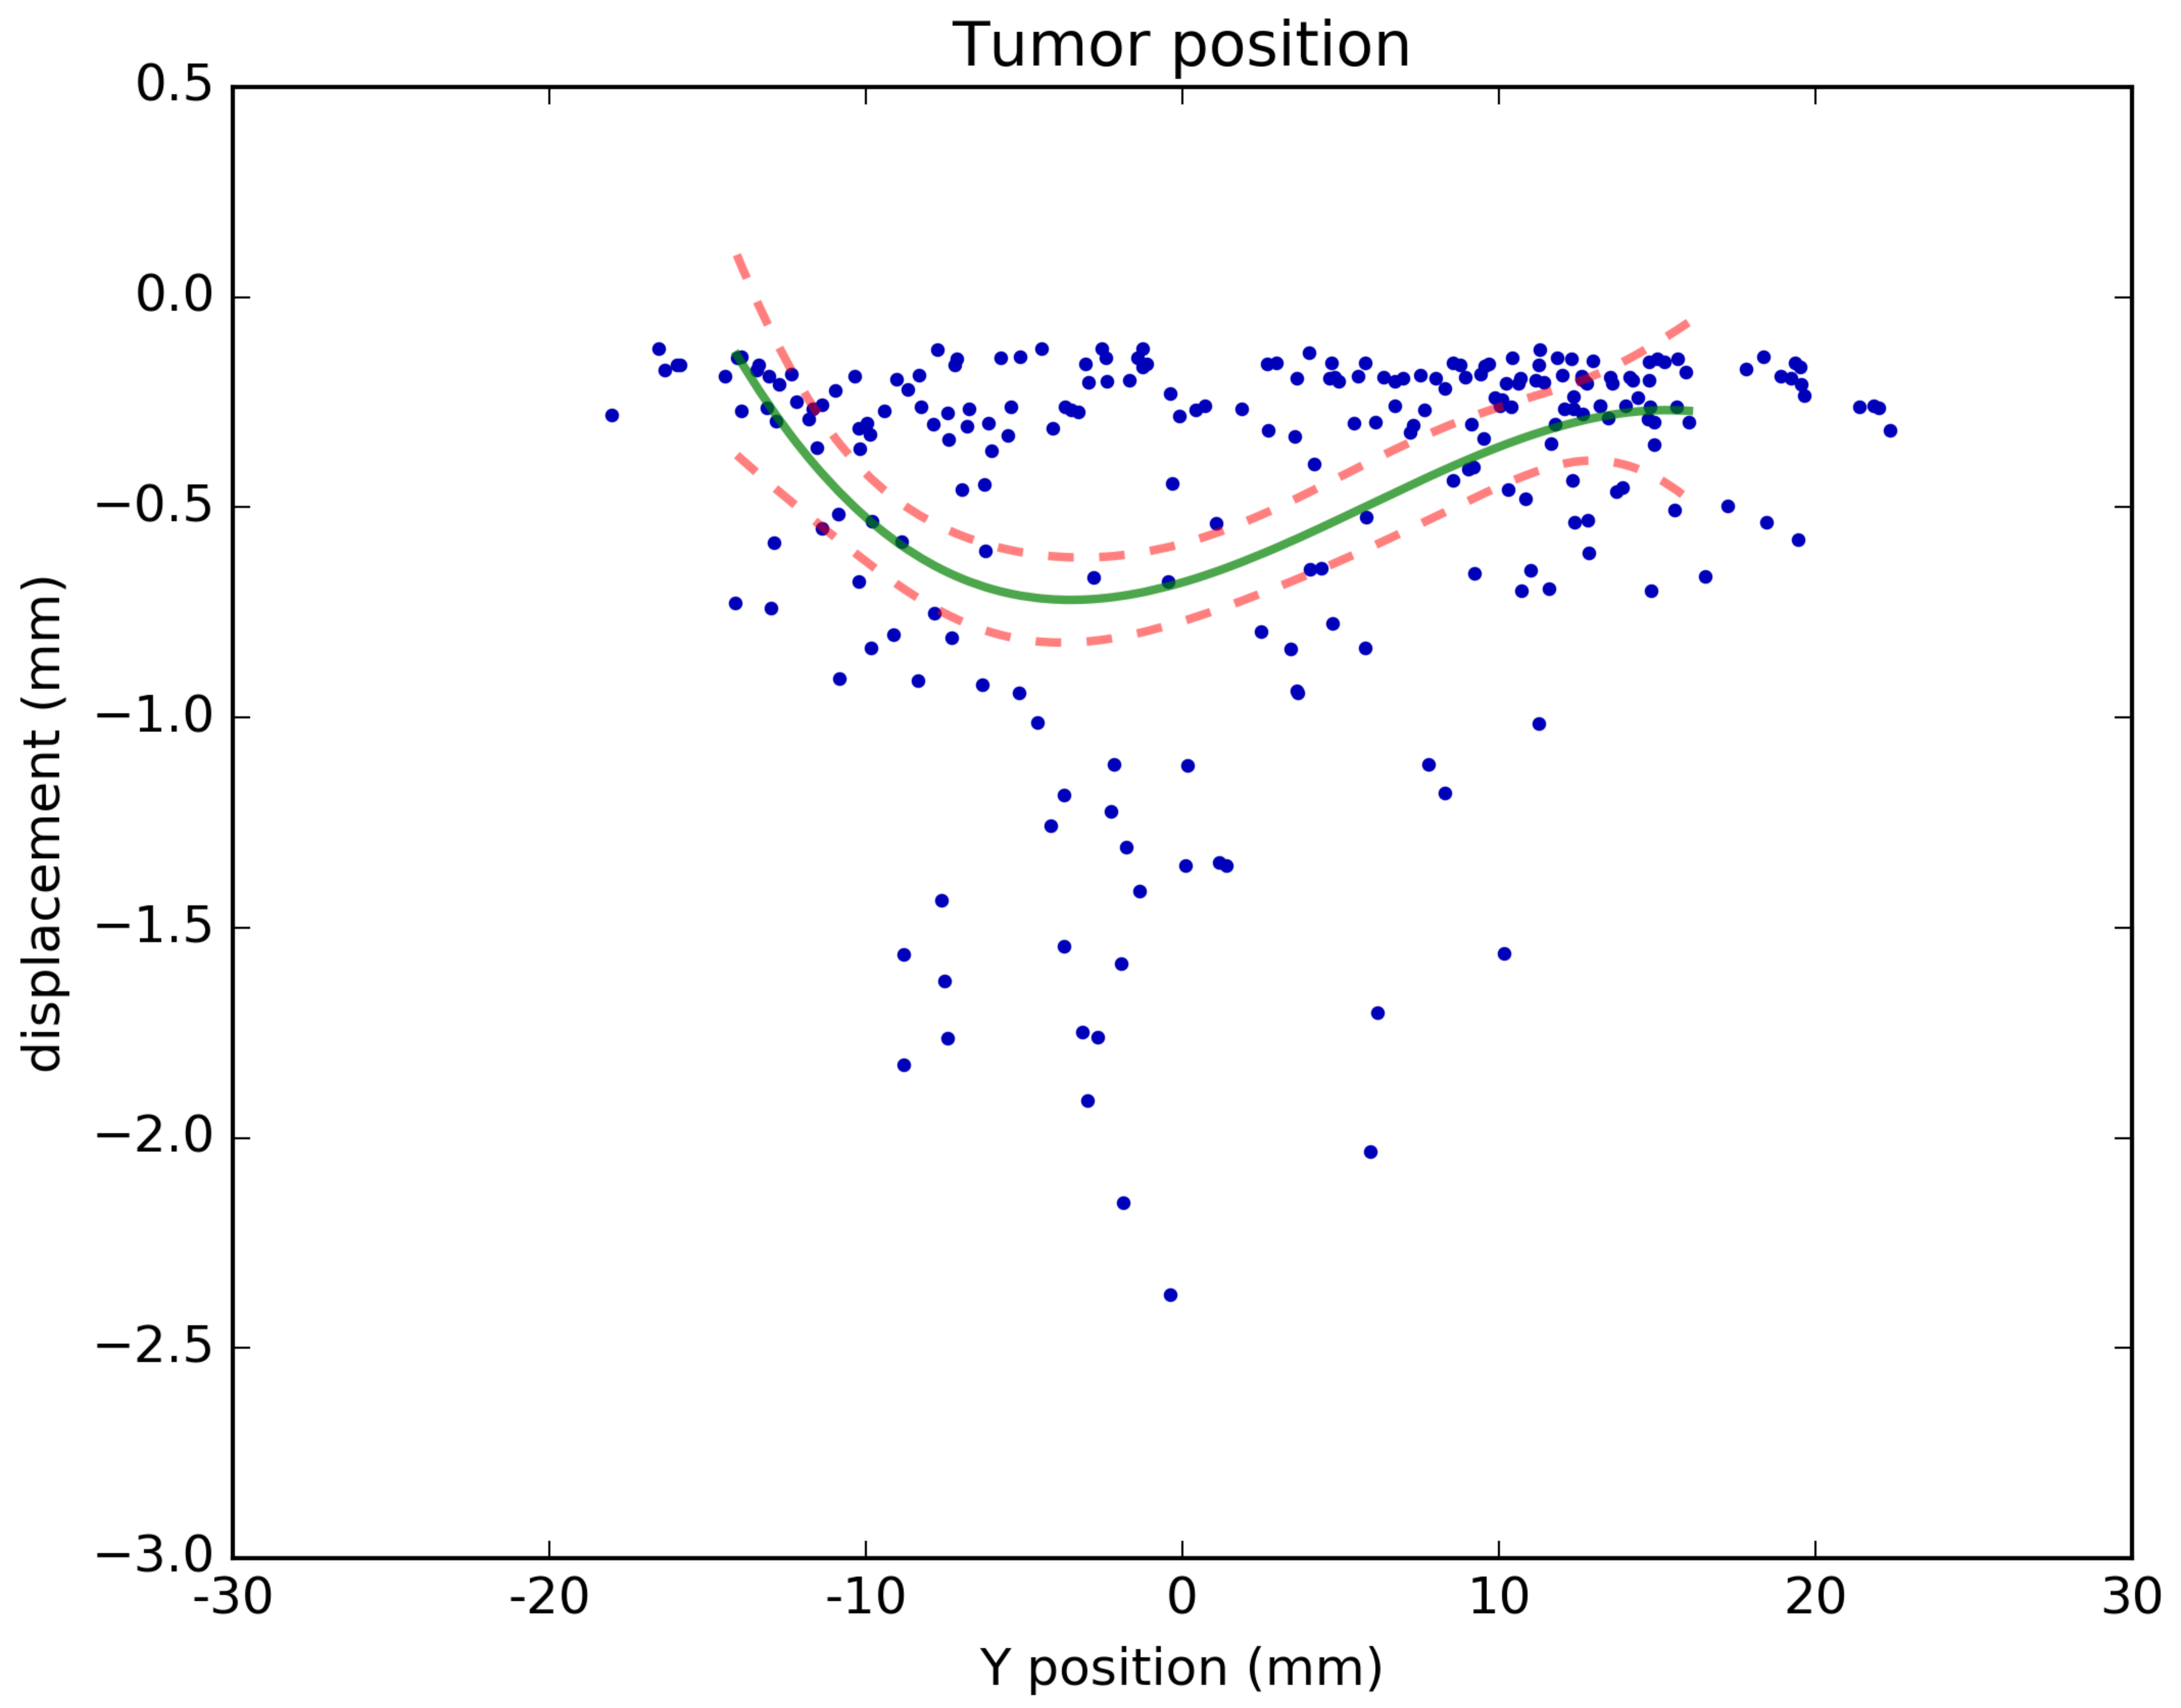

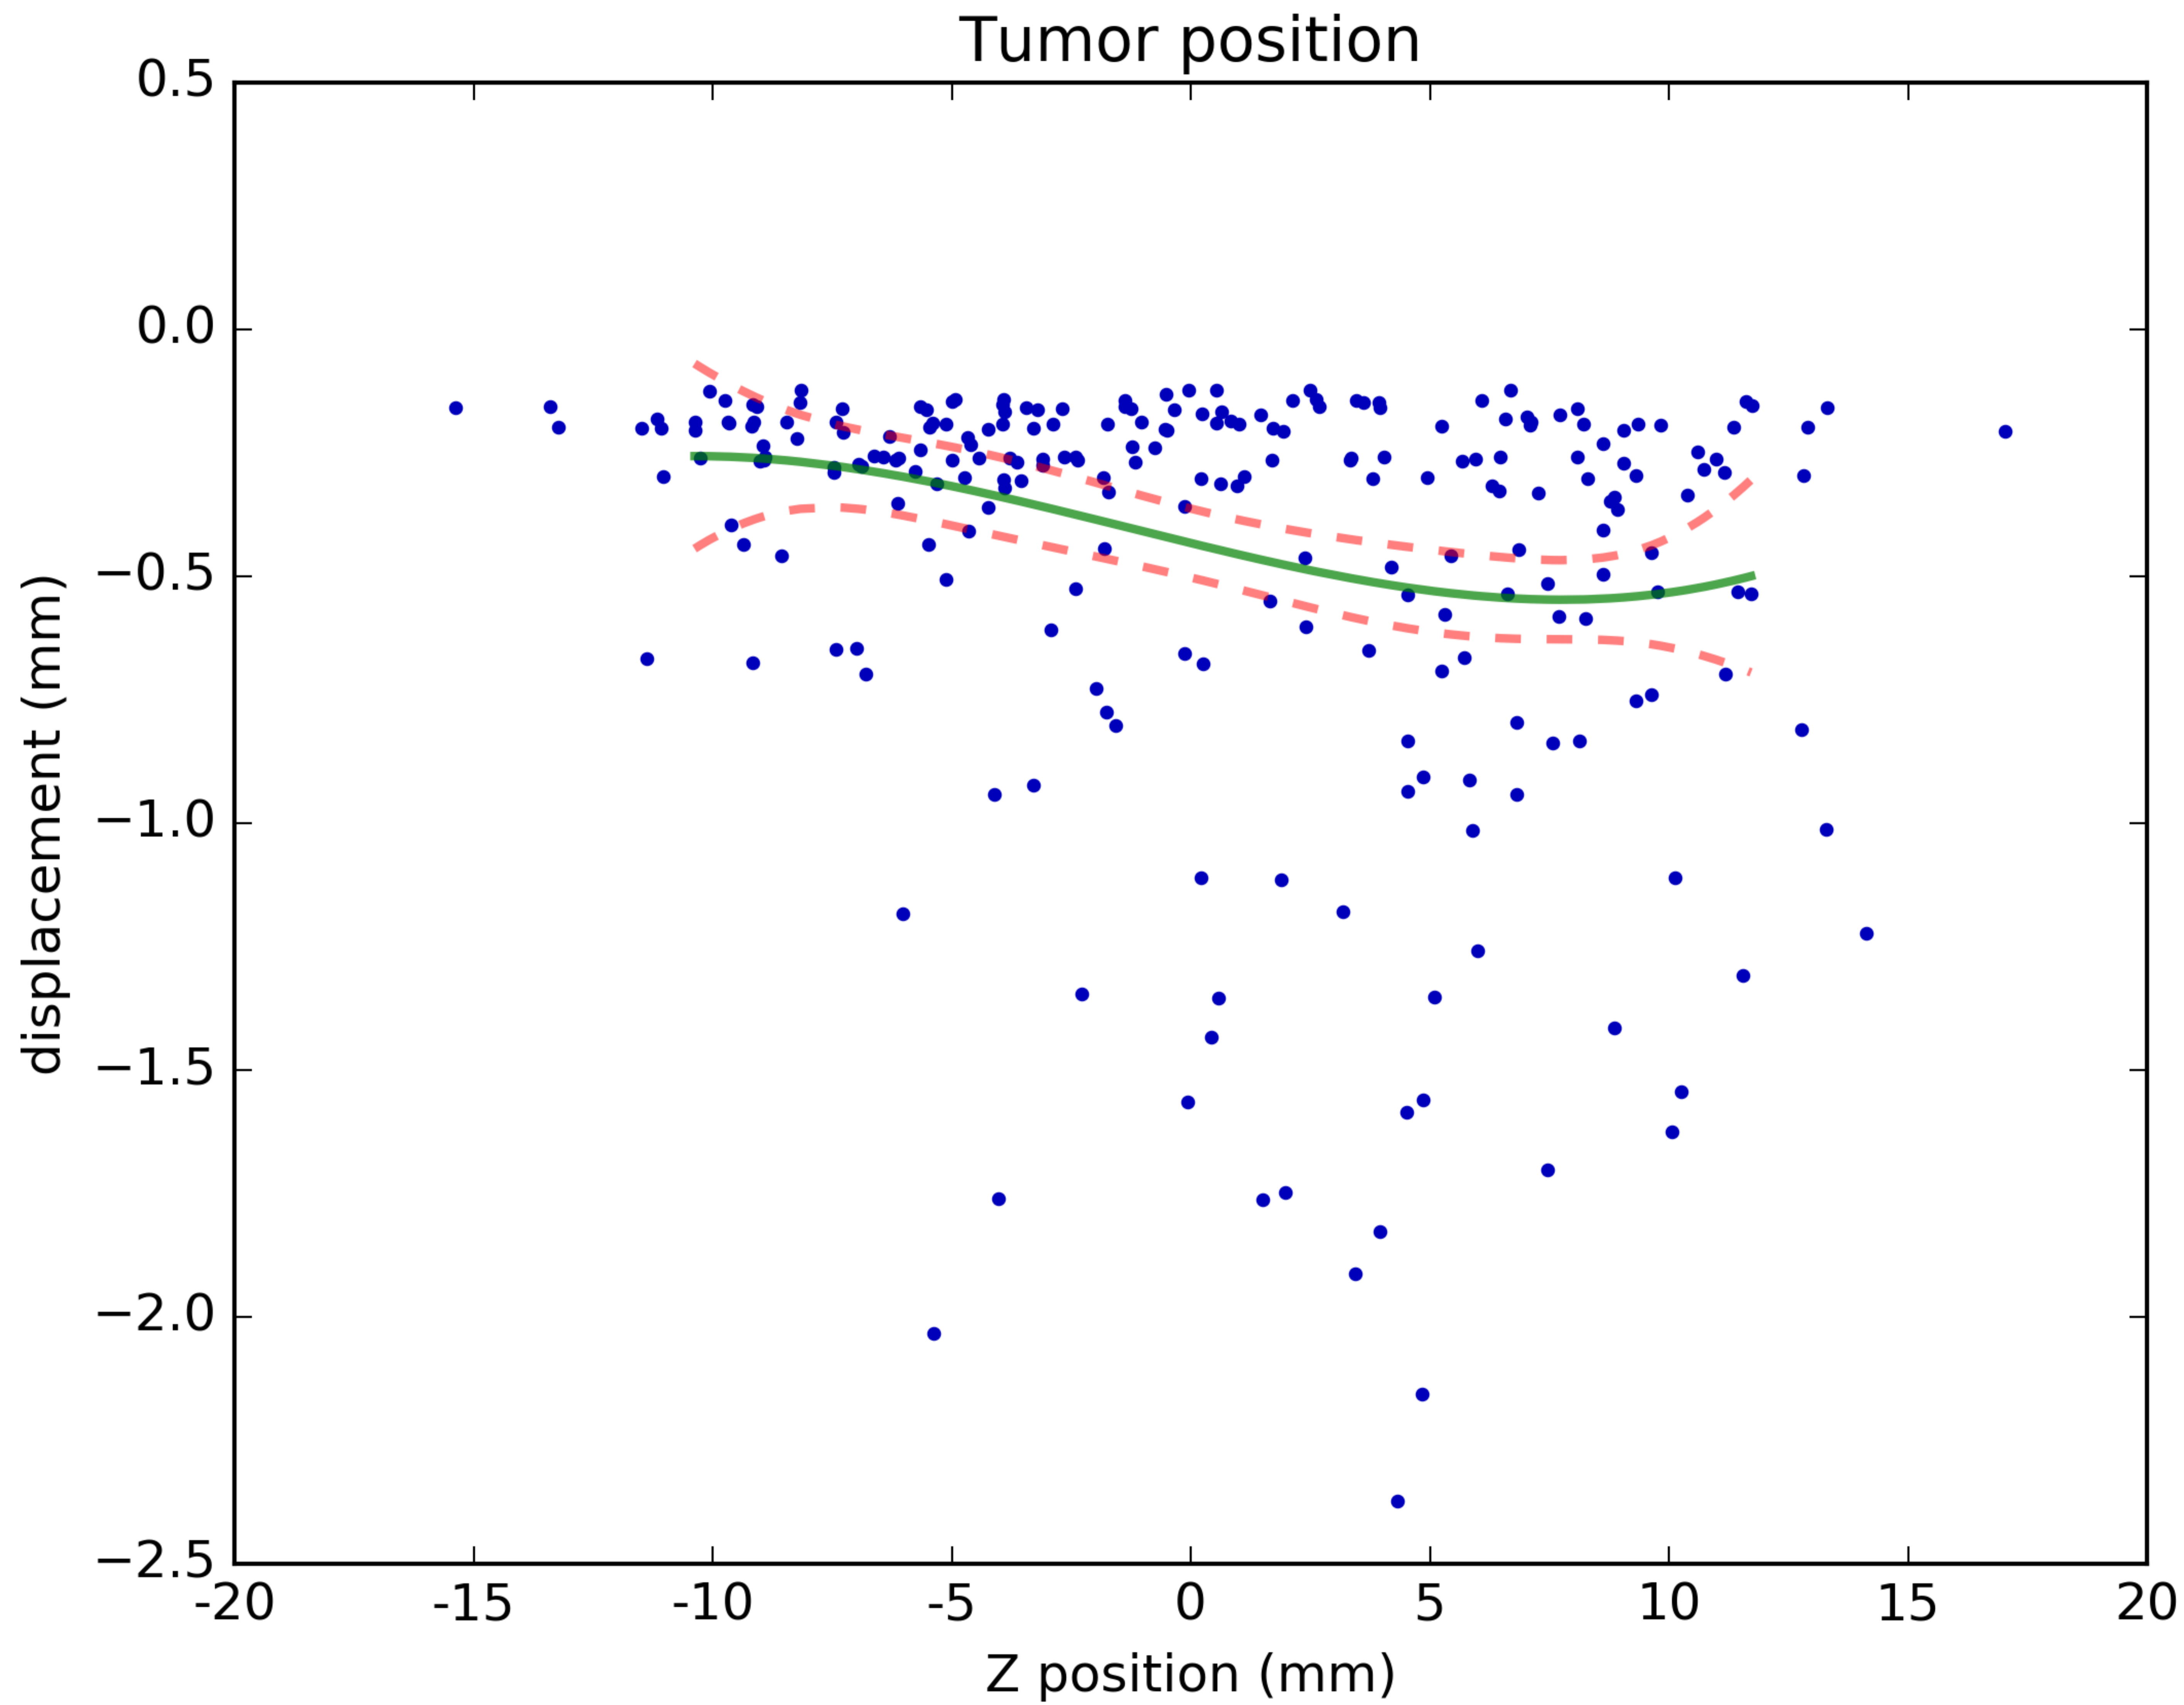

S3: of the bone quality (in average Hounsfield units for each vertebra) in determining the average axial displacement

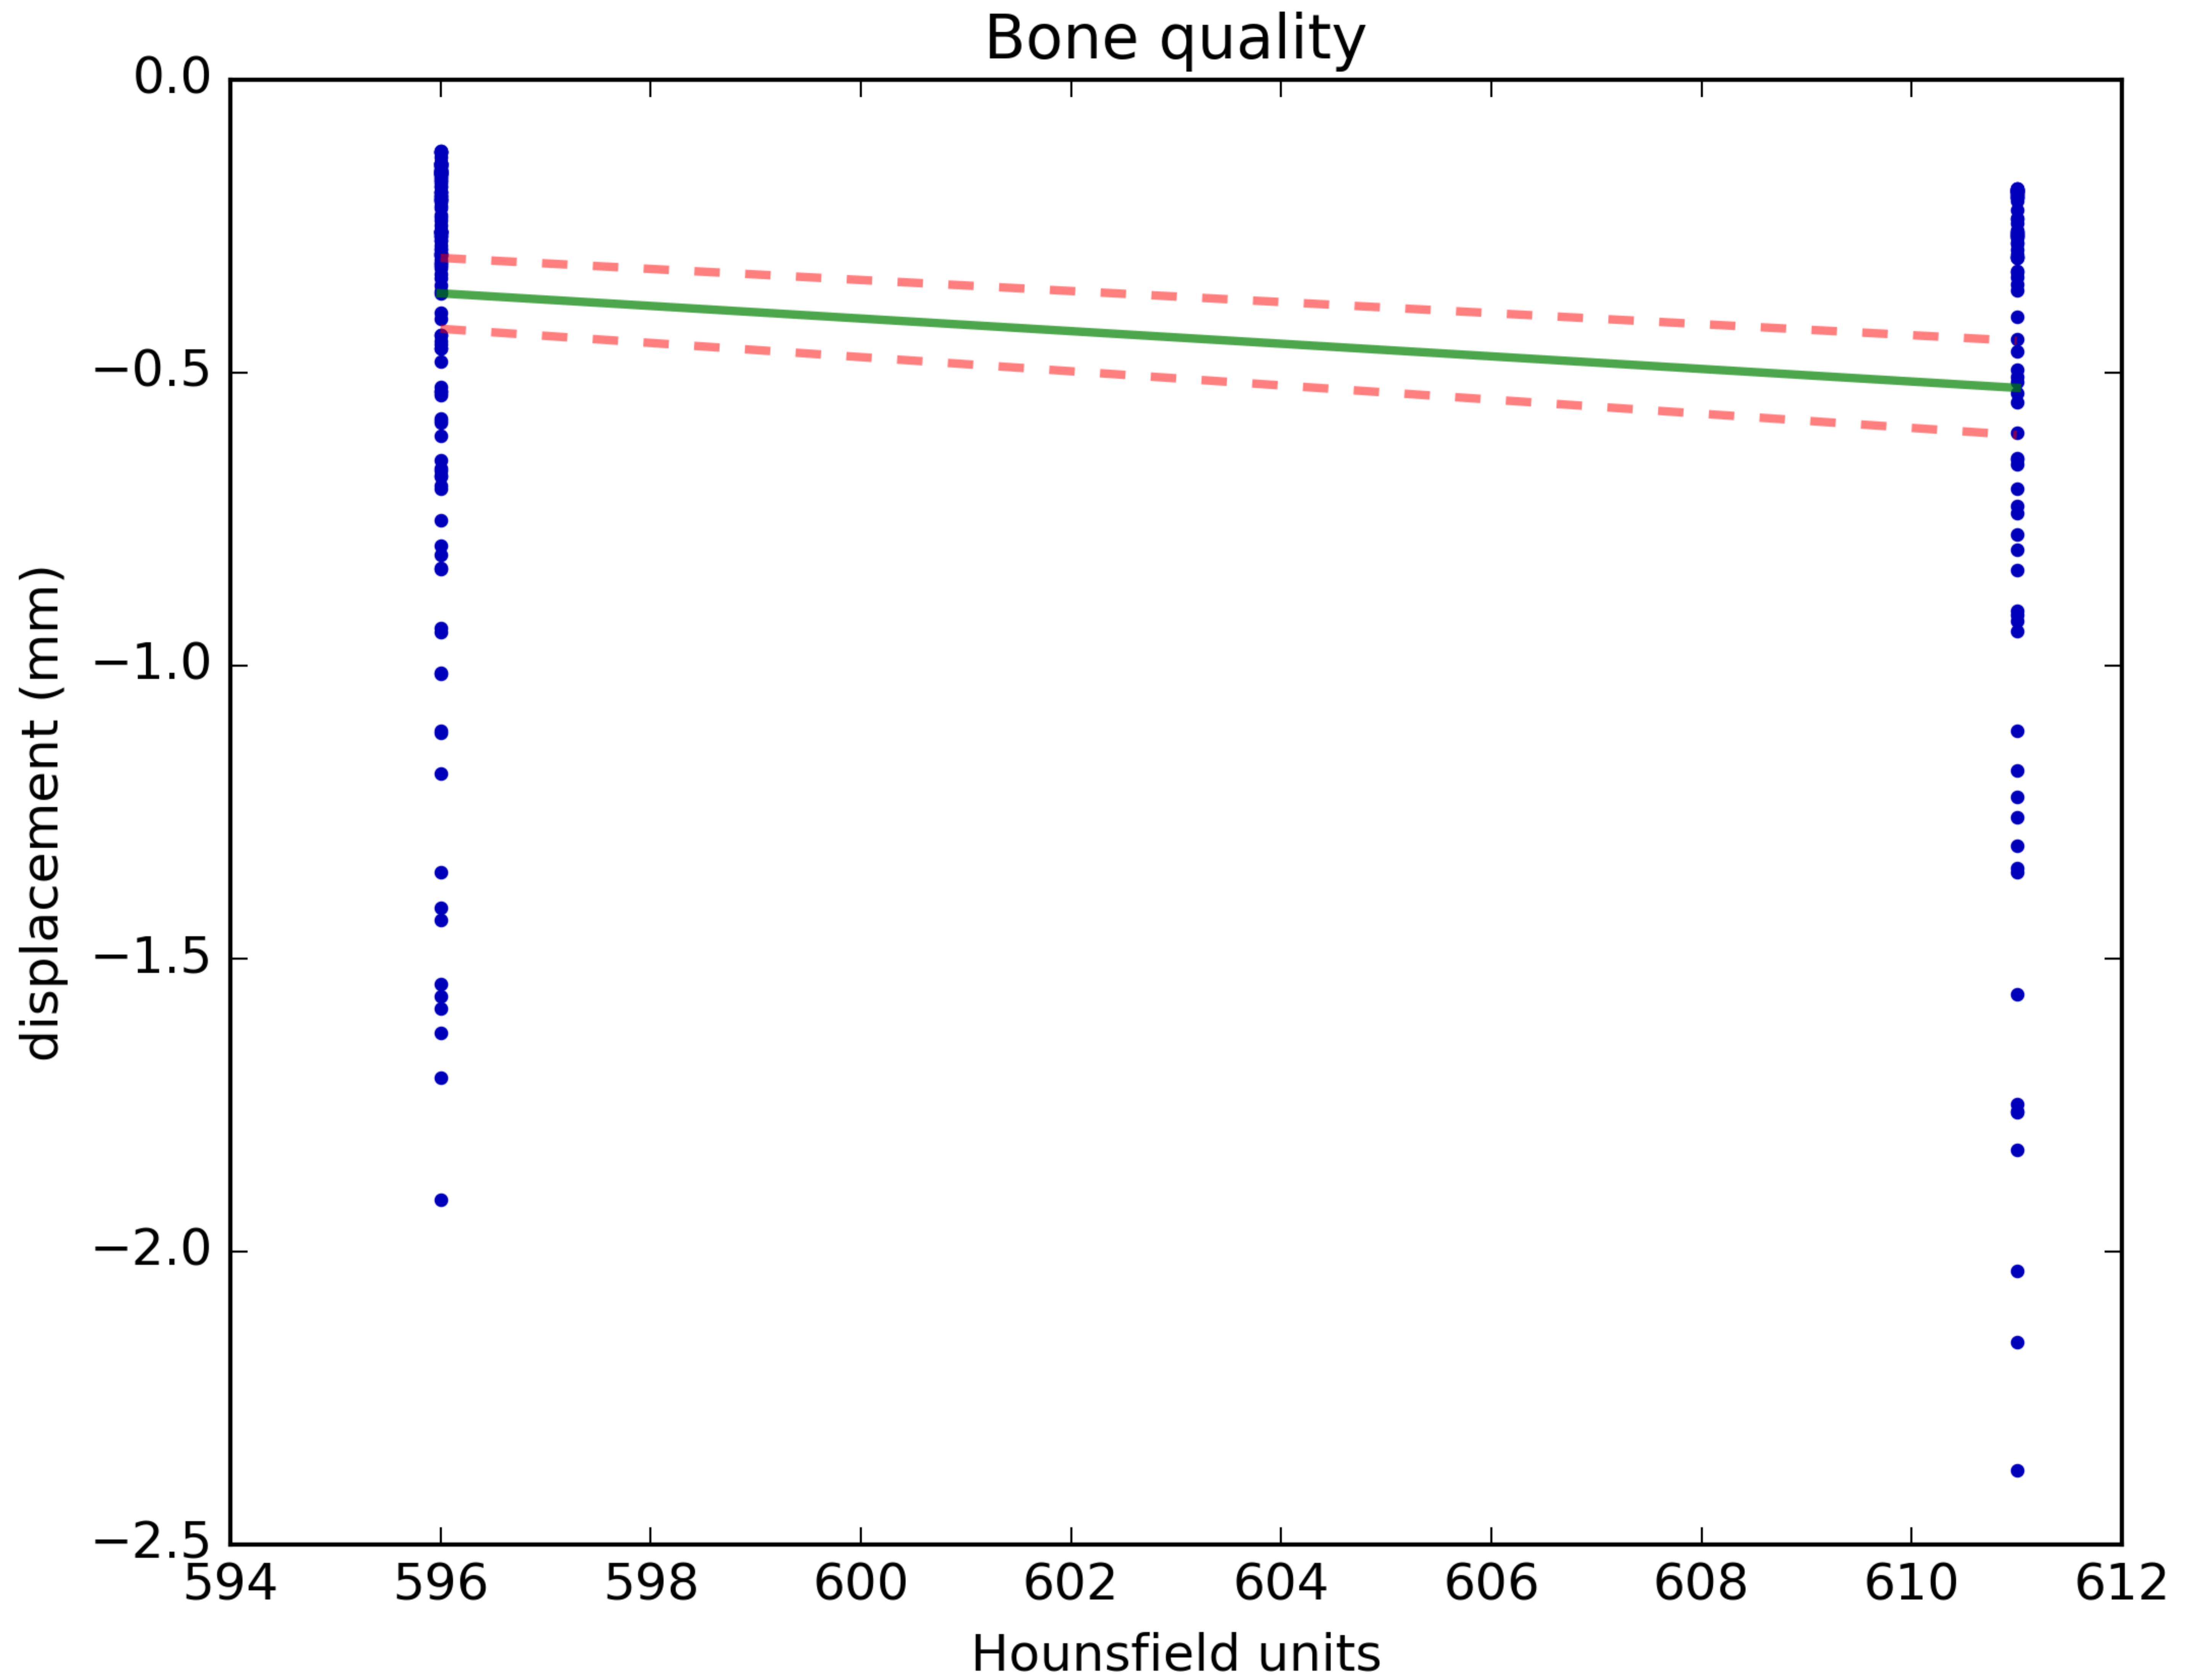

S3: Effect of the vertebral level in determining the average axial displacement

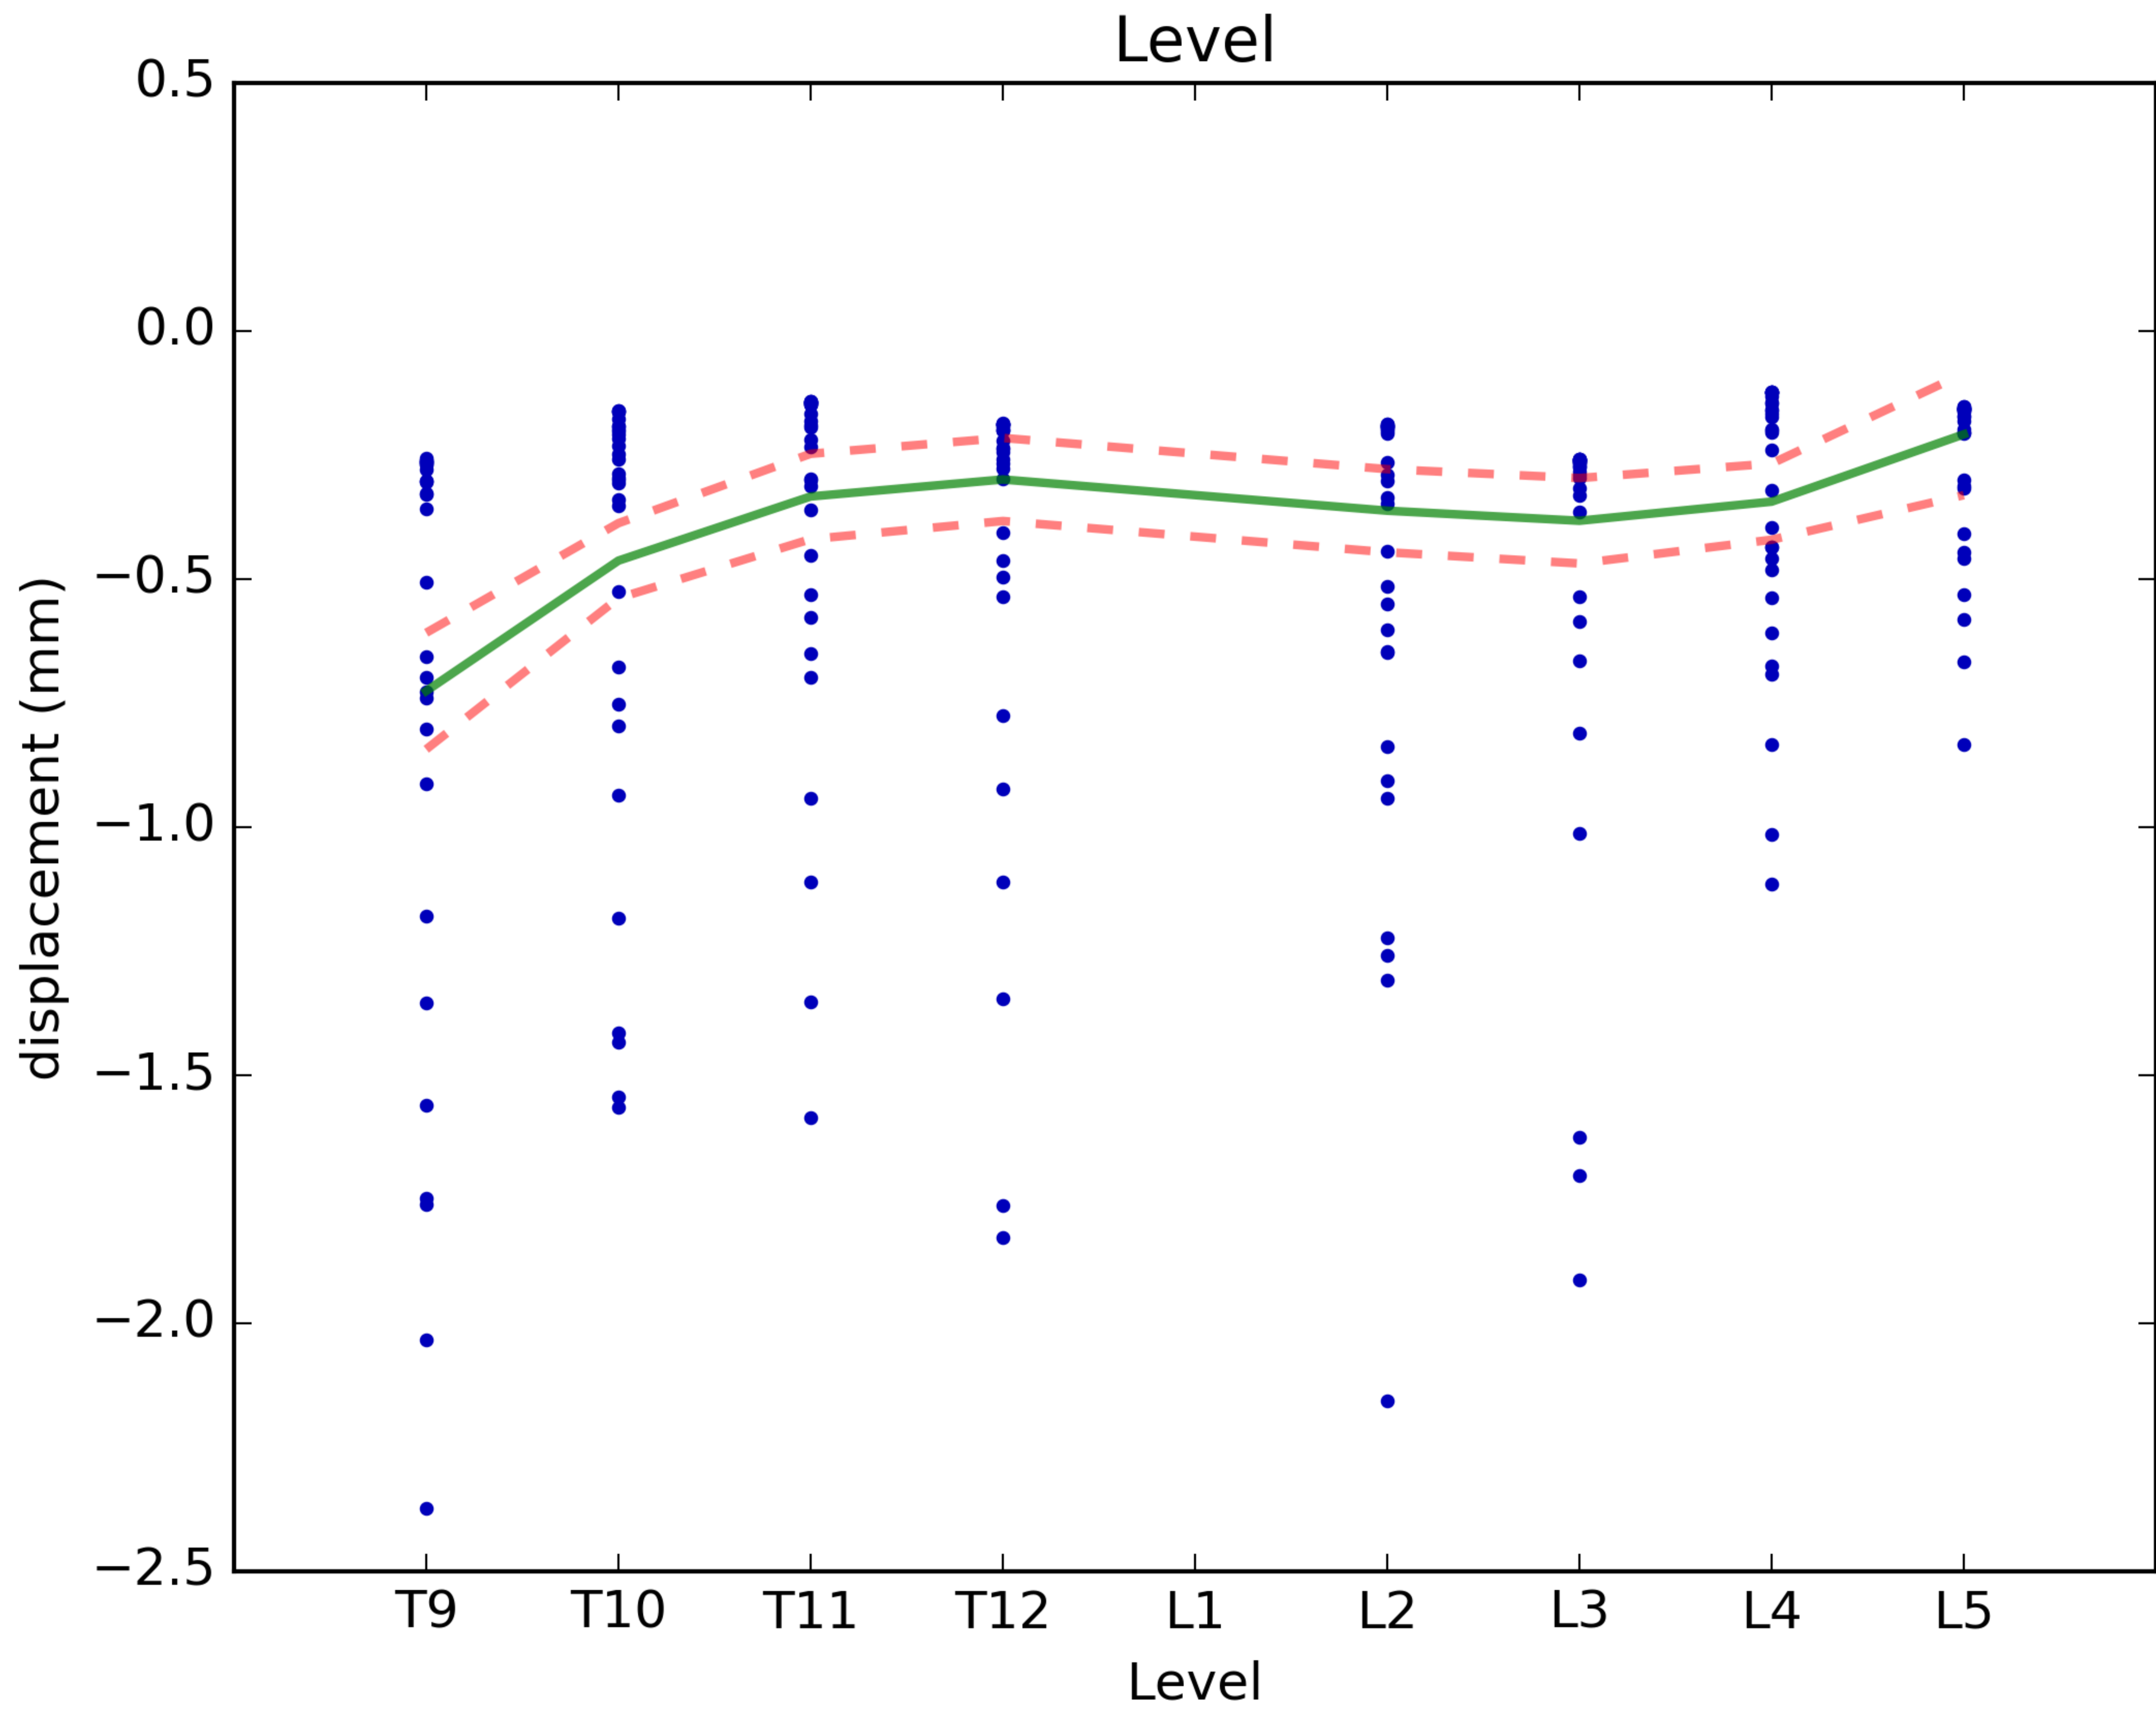

S3: Effect of the tumor size (in mm) in determining the vertebral bulge

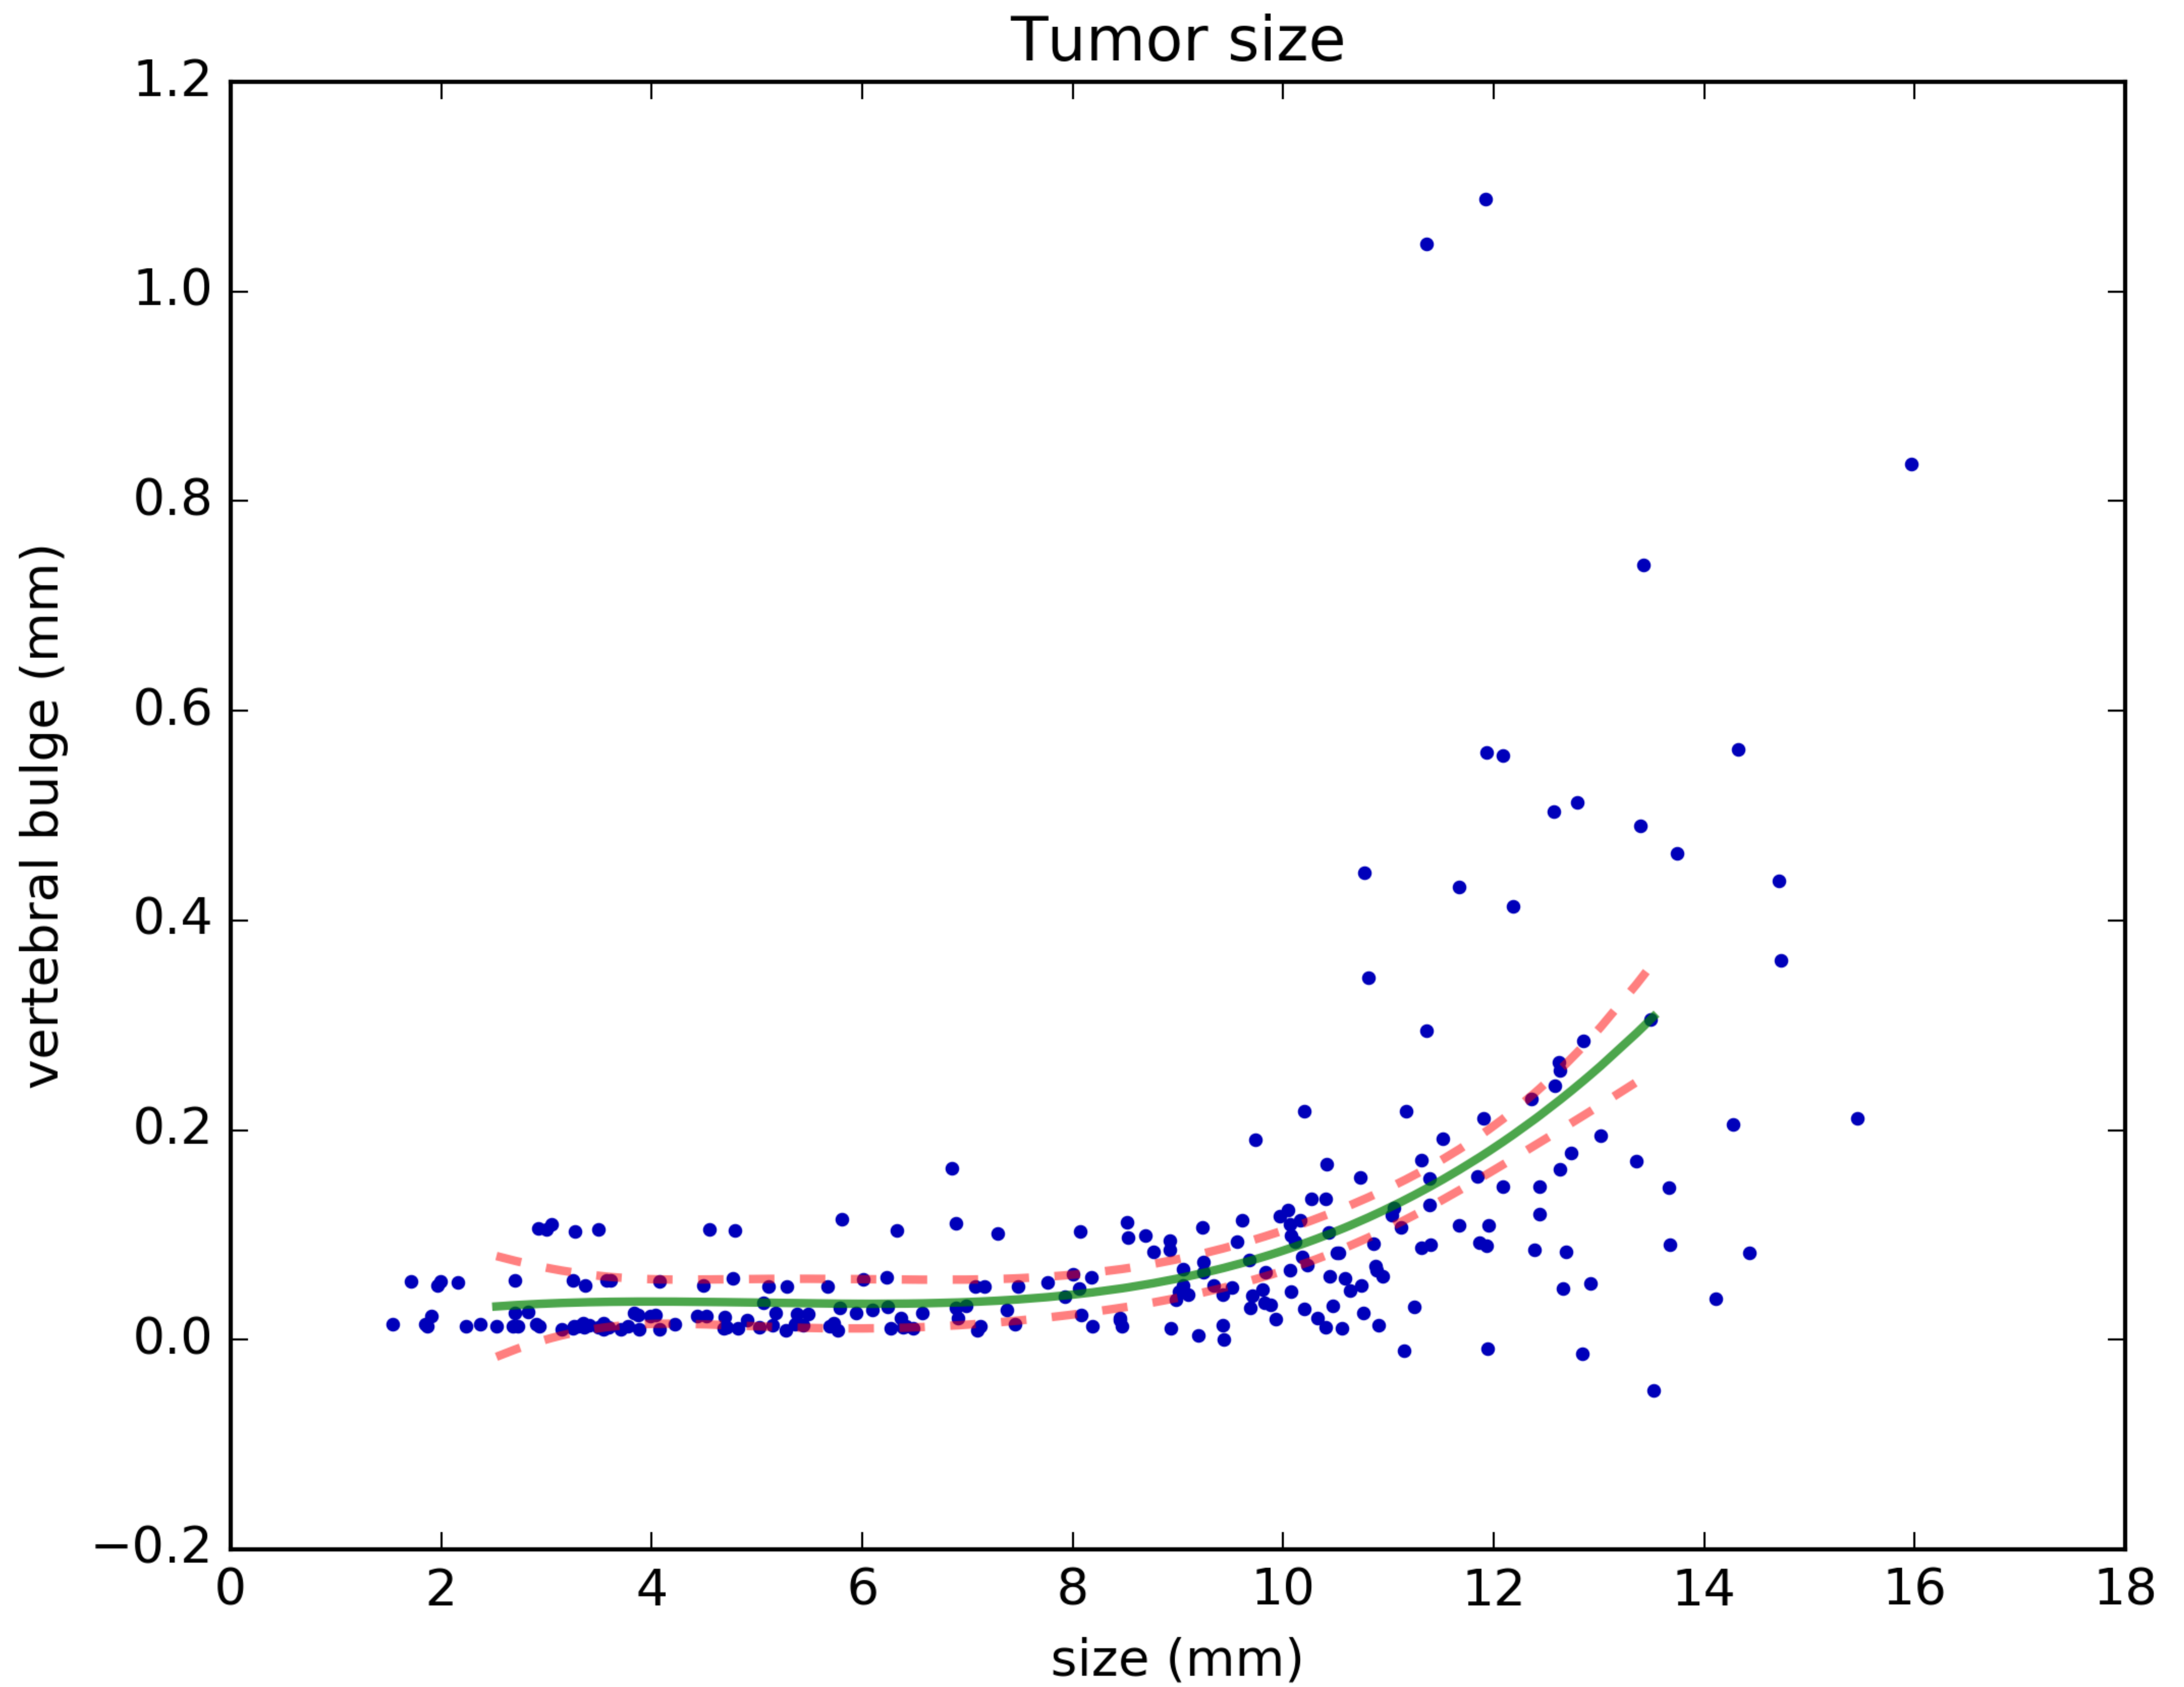



S3: Effect of the tumor size (in mm<sup>3</sup>) in determining the vertebral bulge

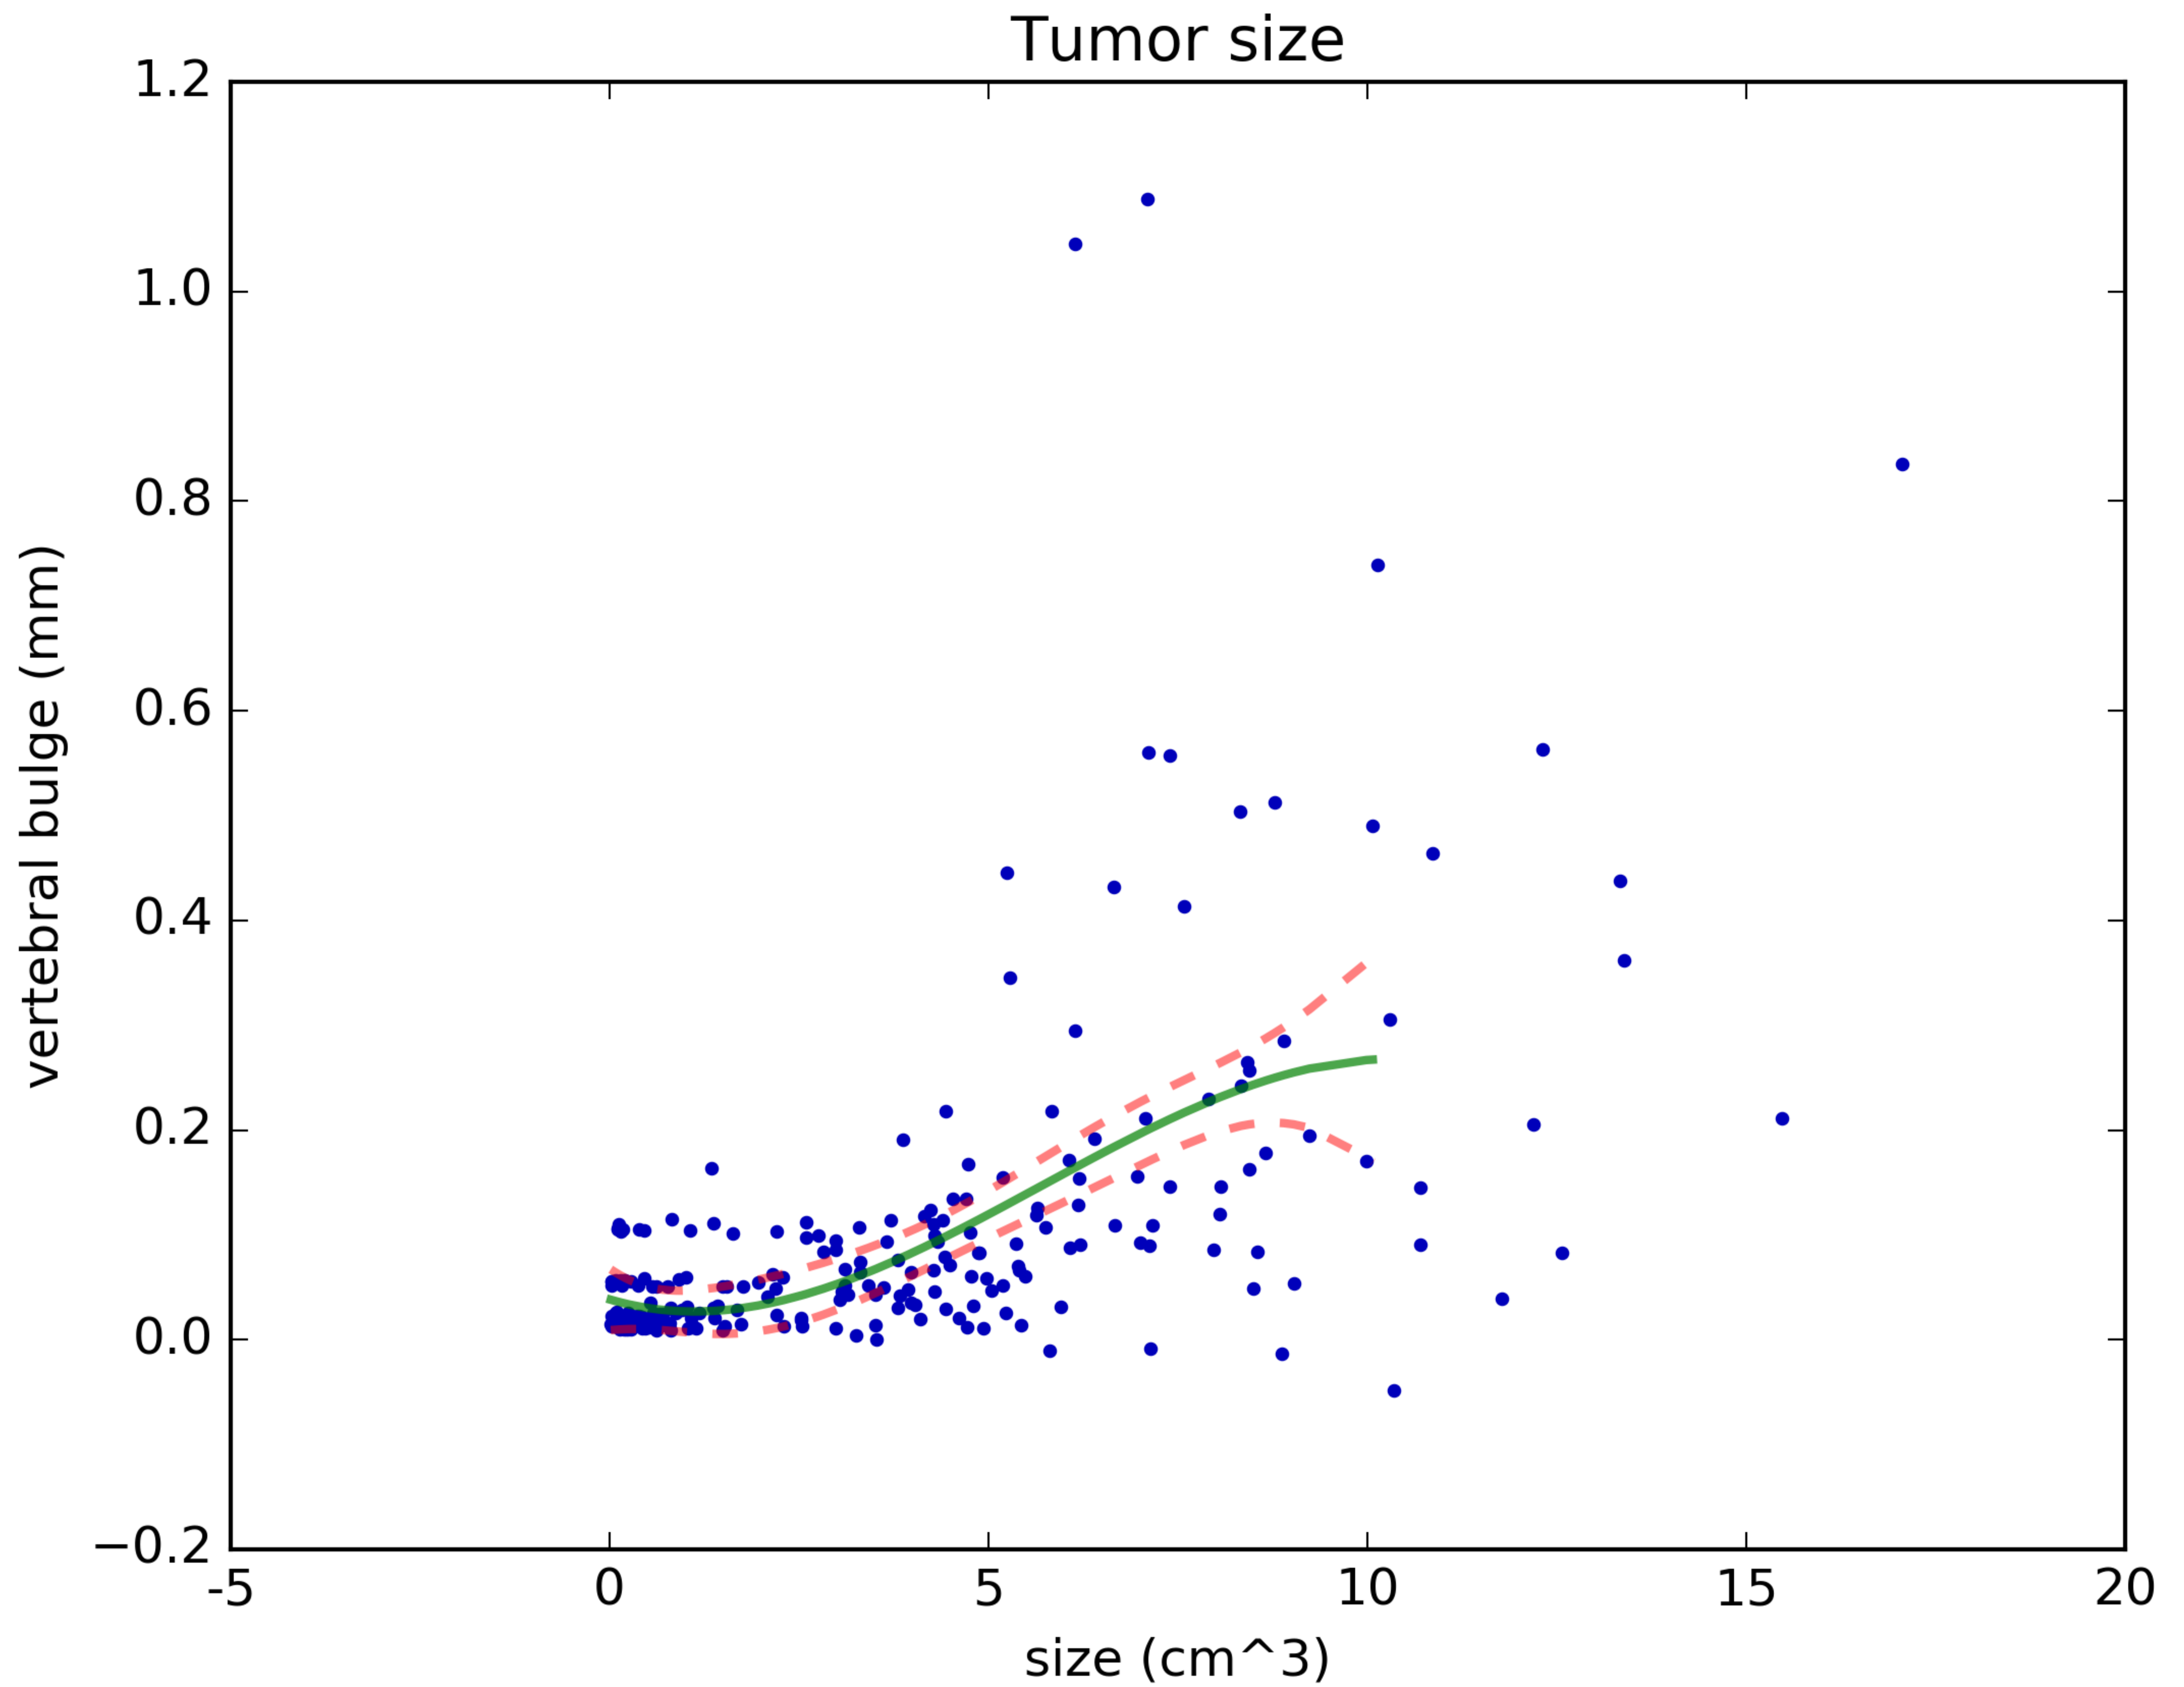

S3: Effect of the tumor position (X coordinate of the centroid) in determining the vertebral bulge

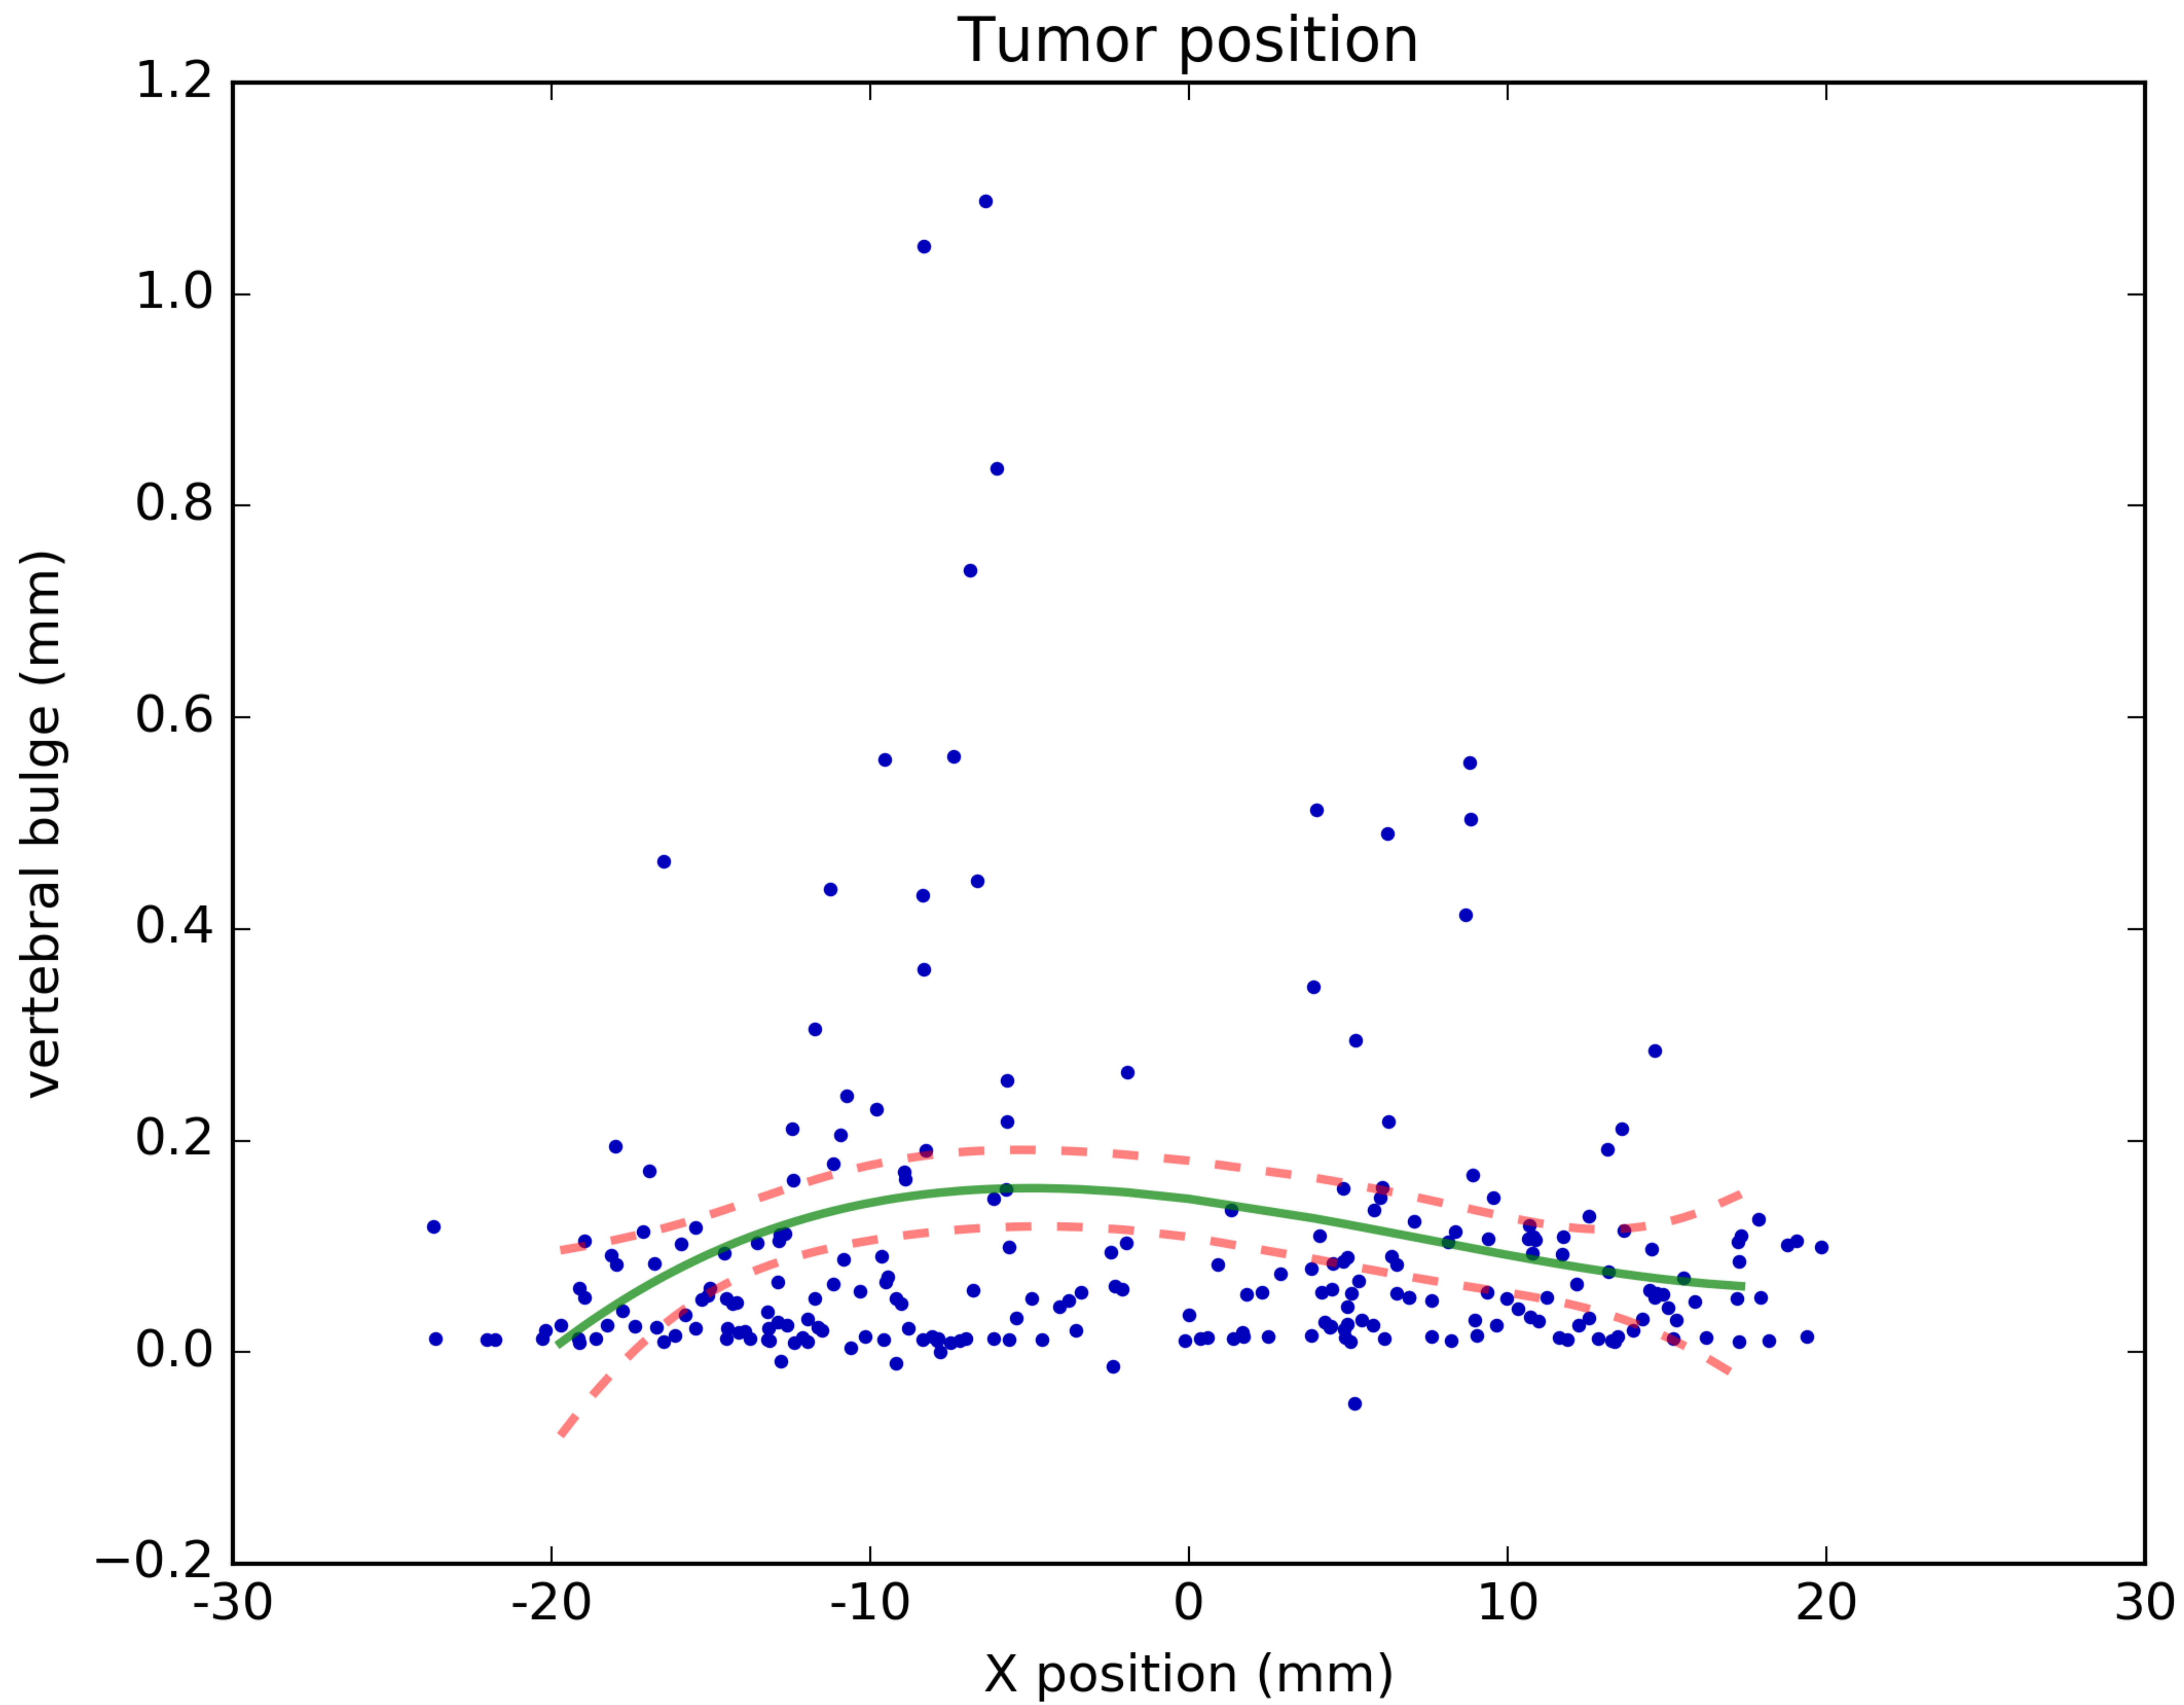

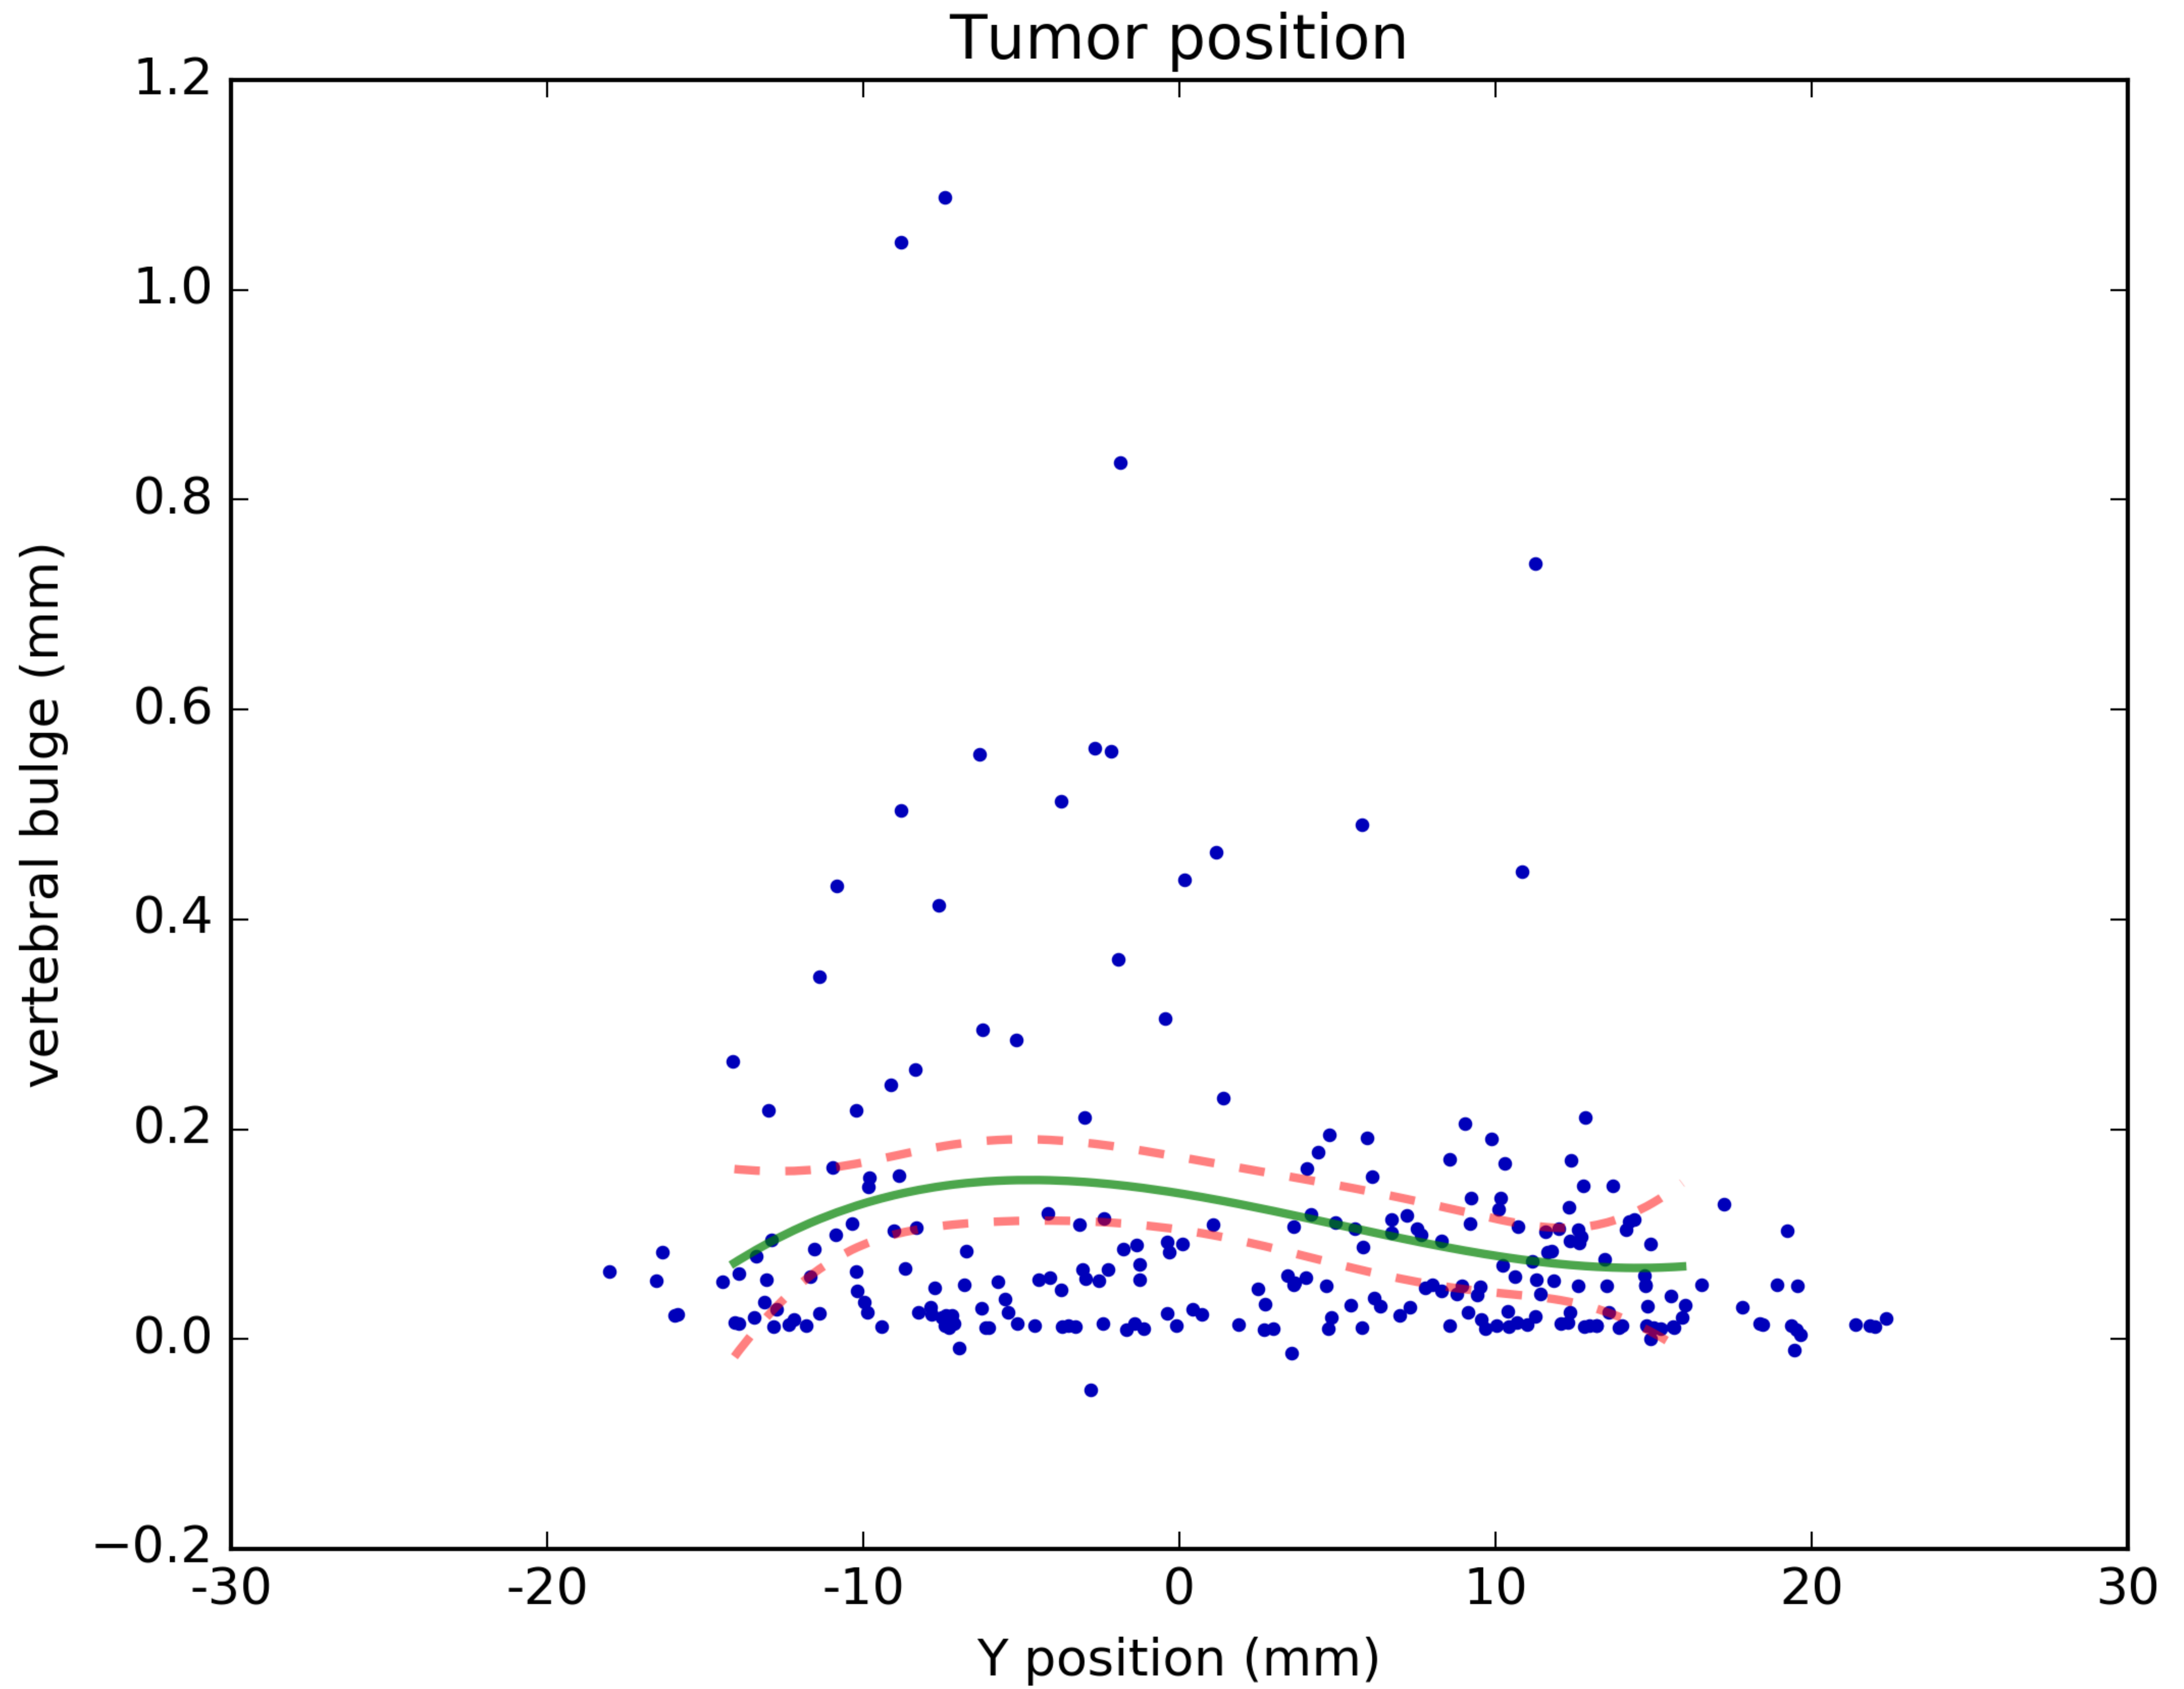

S3: Effect of the tumor position (Z coordinate of the centroid) in determining the vertebral bulge

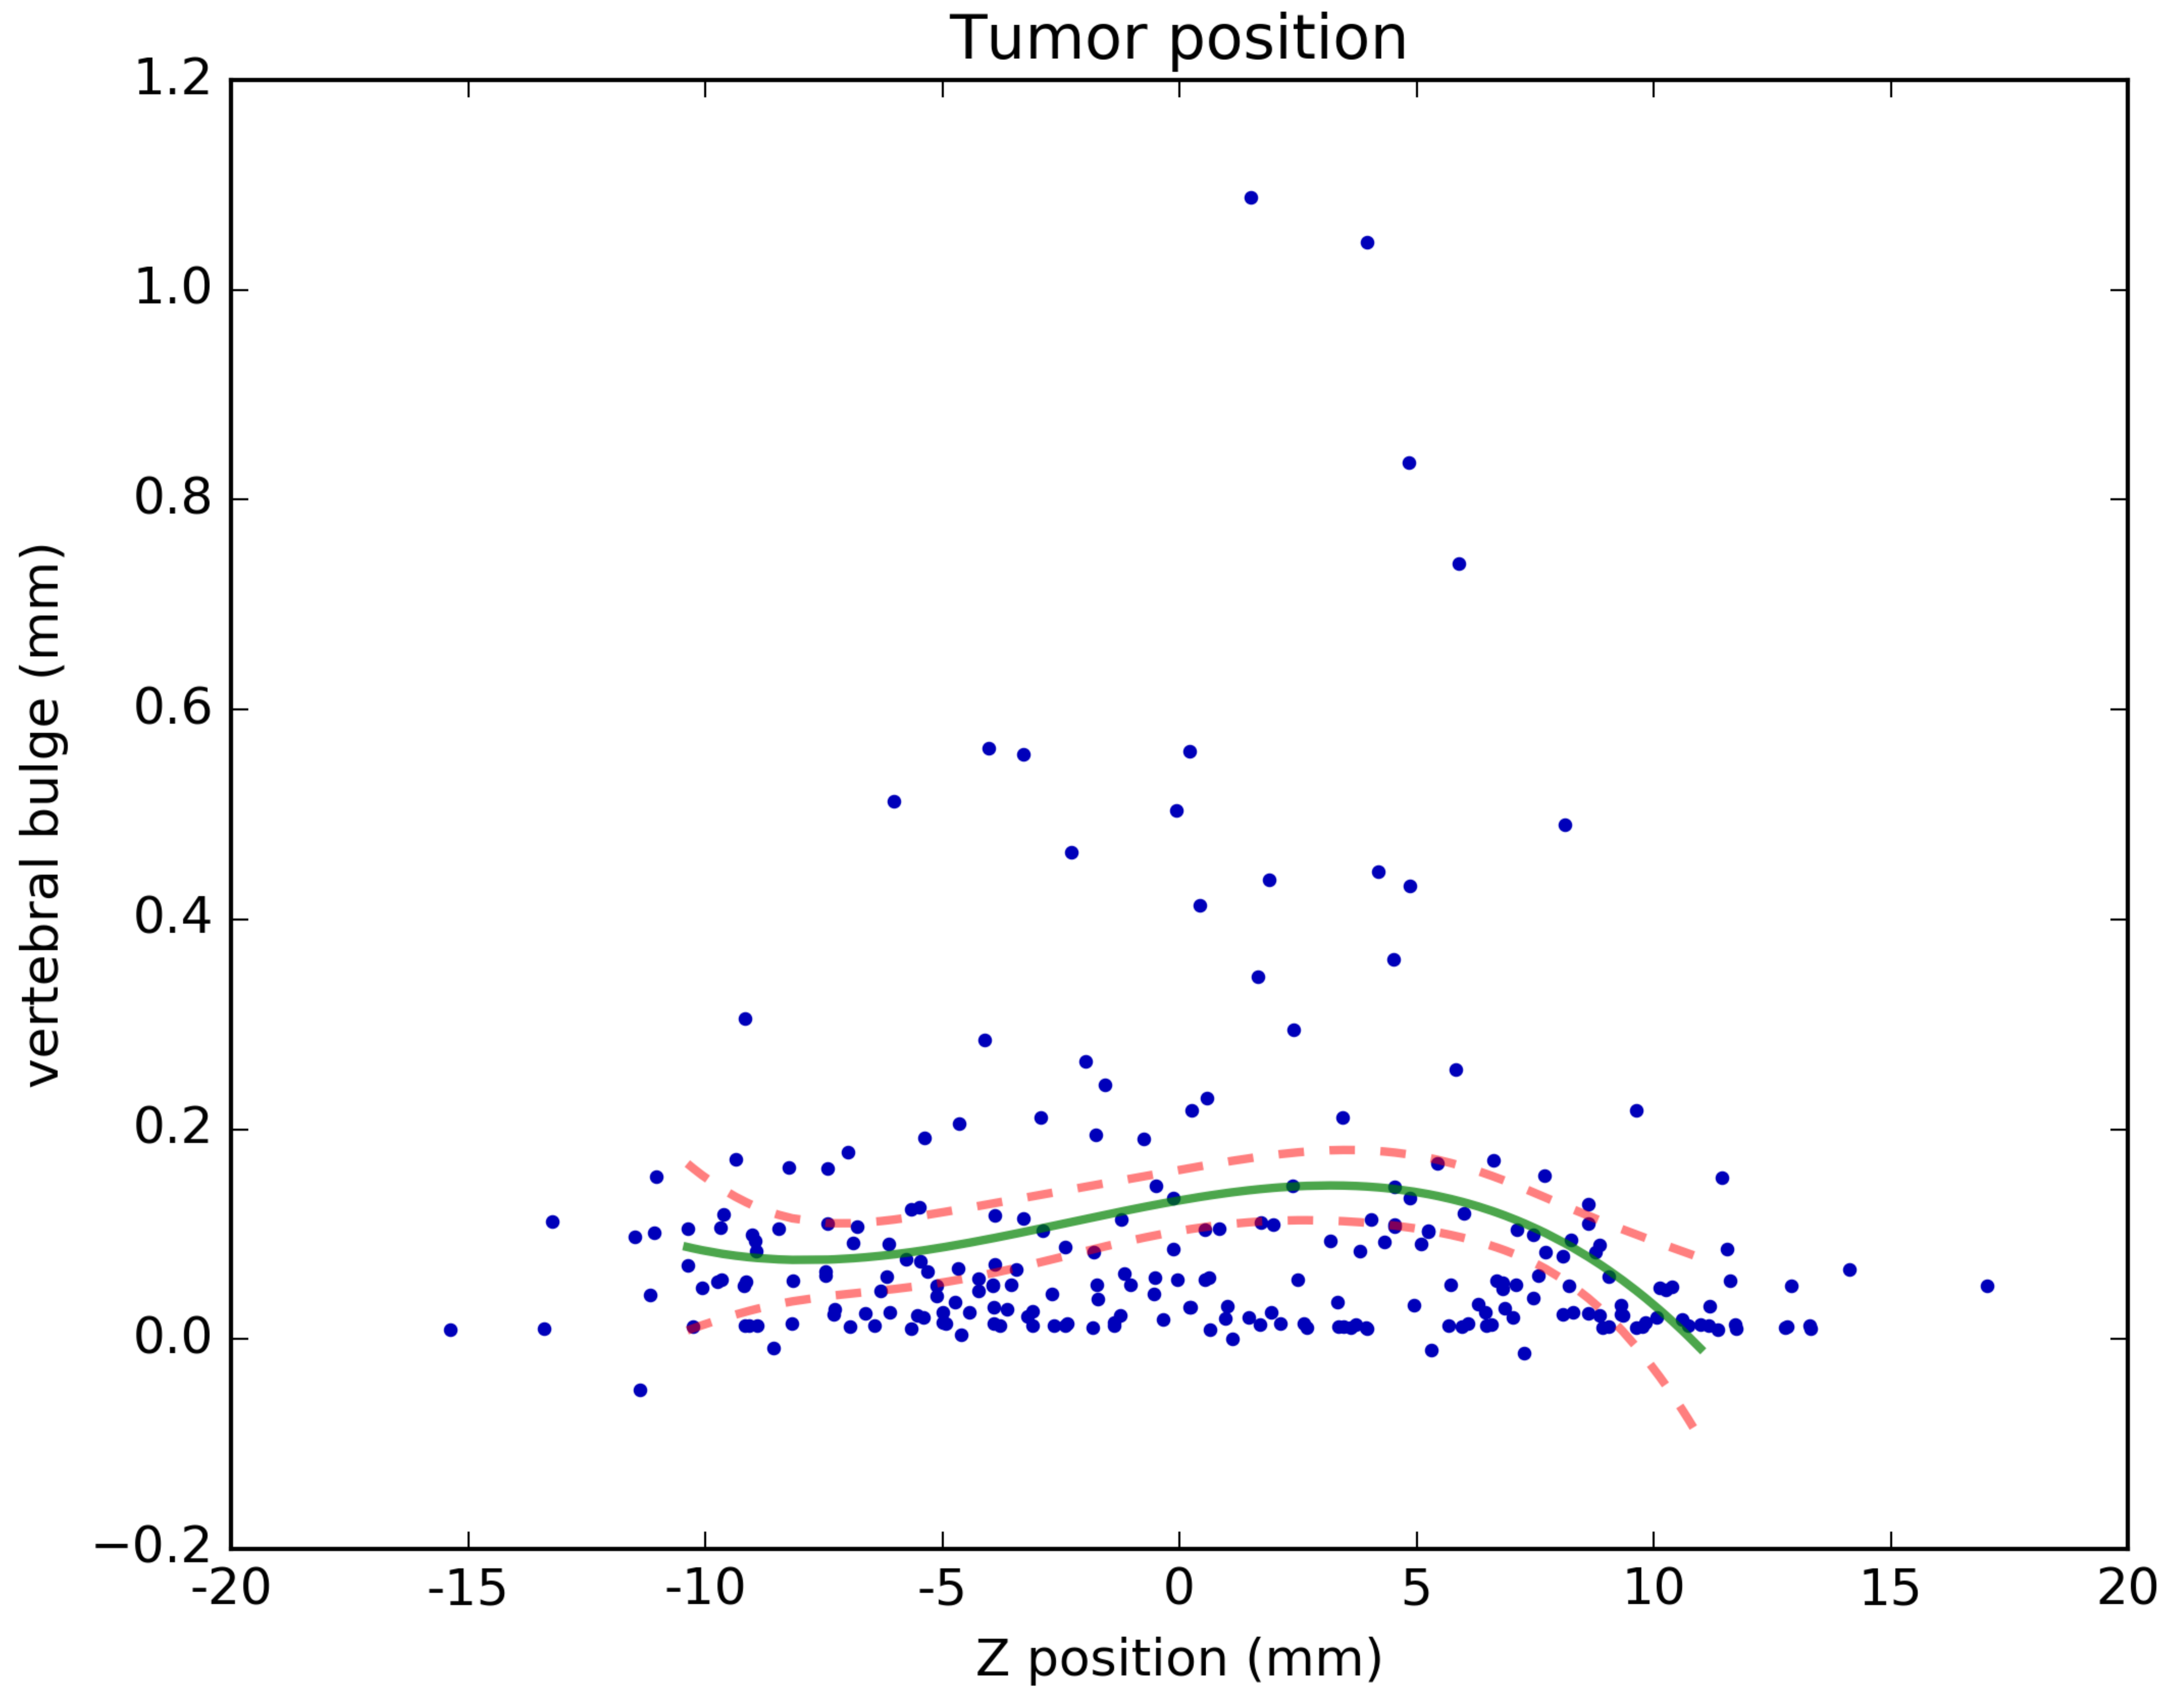

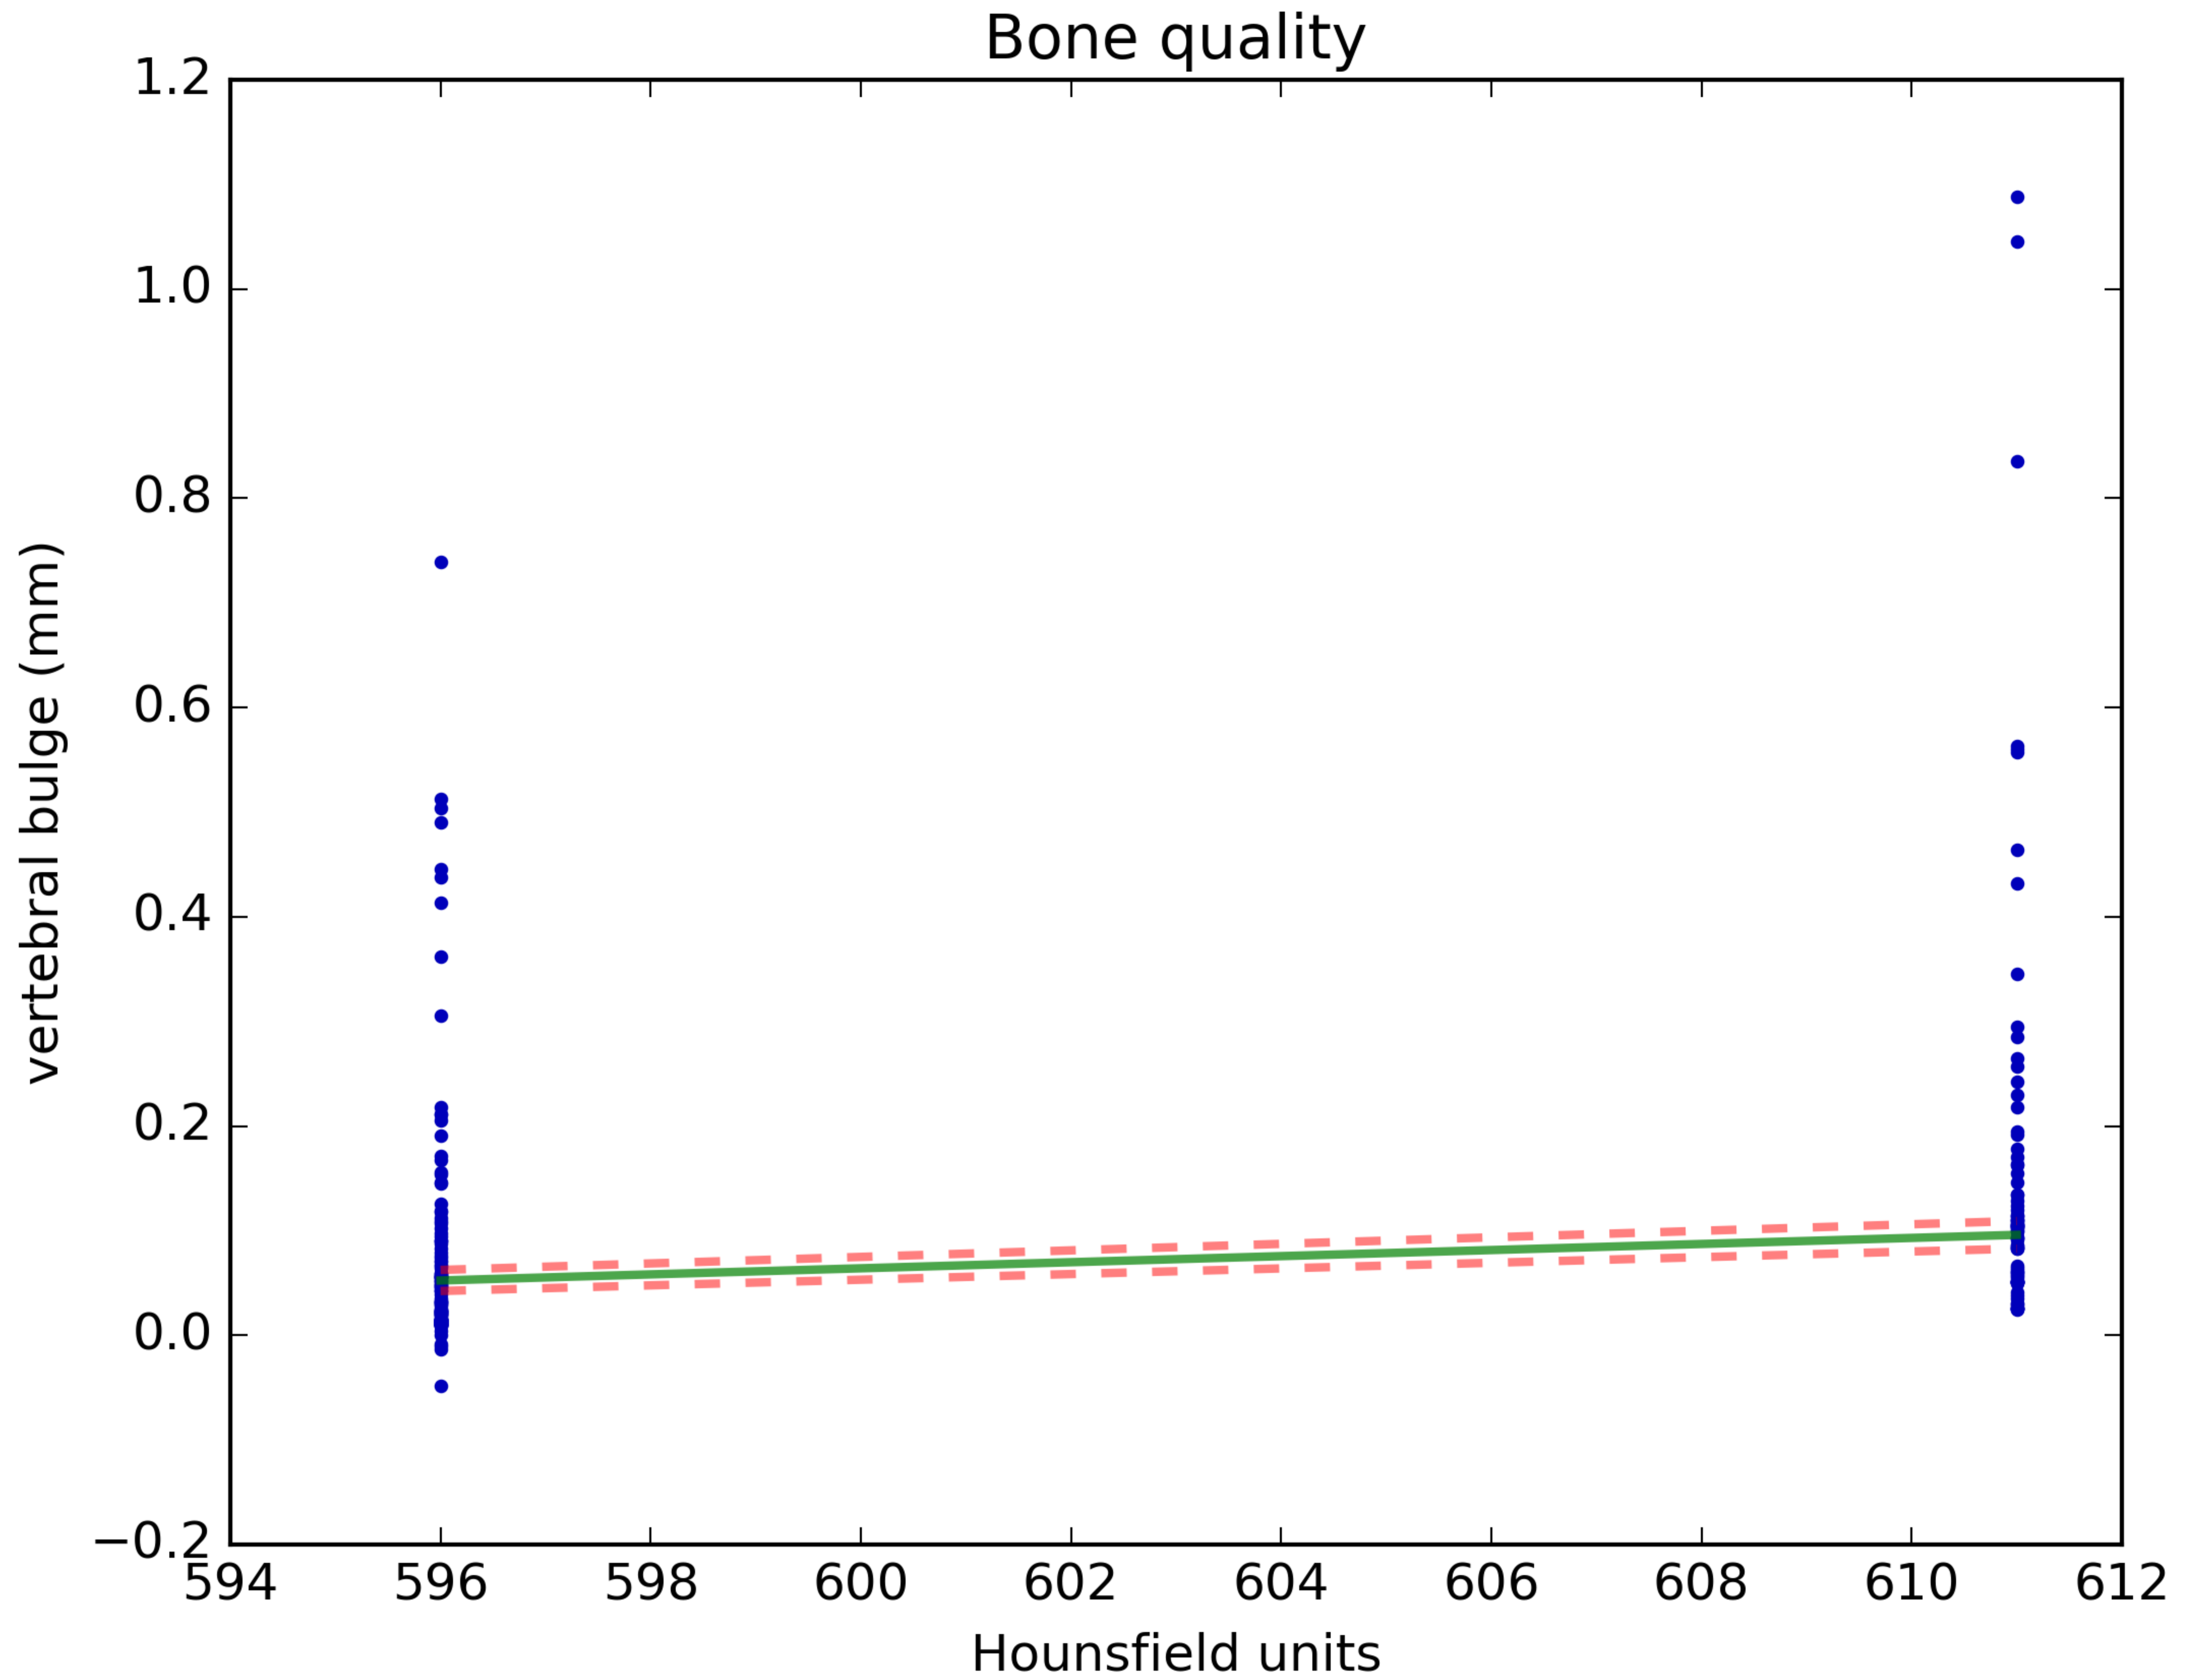

S3: Effect of the vertebral level in determining the vertebral bulge

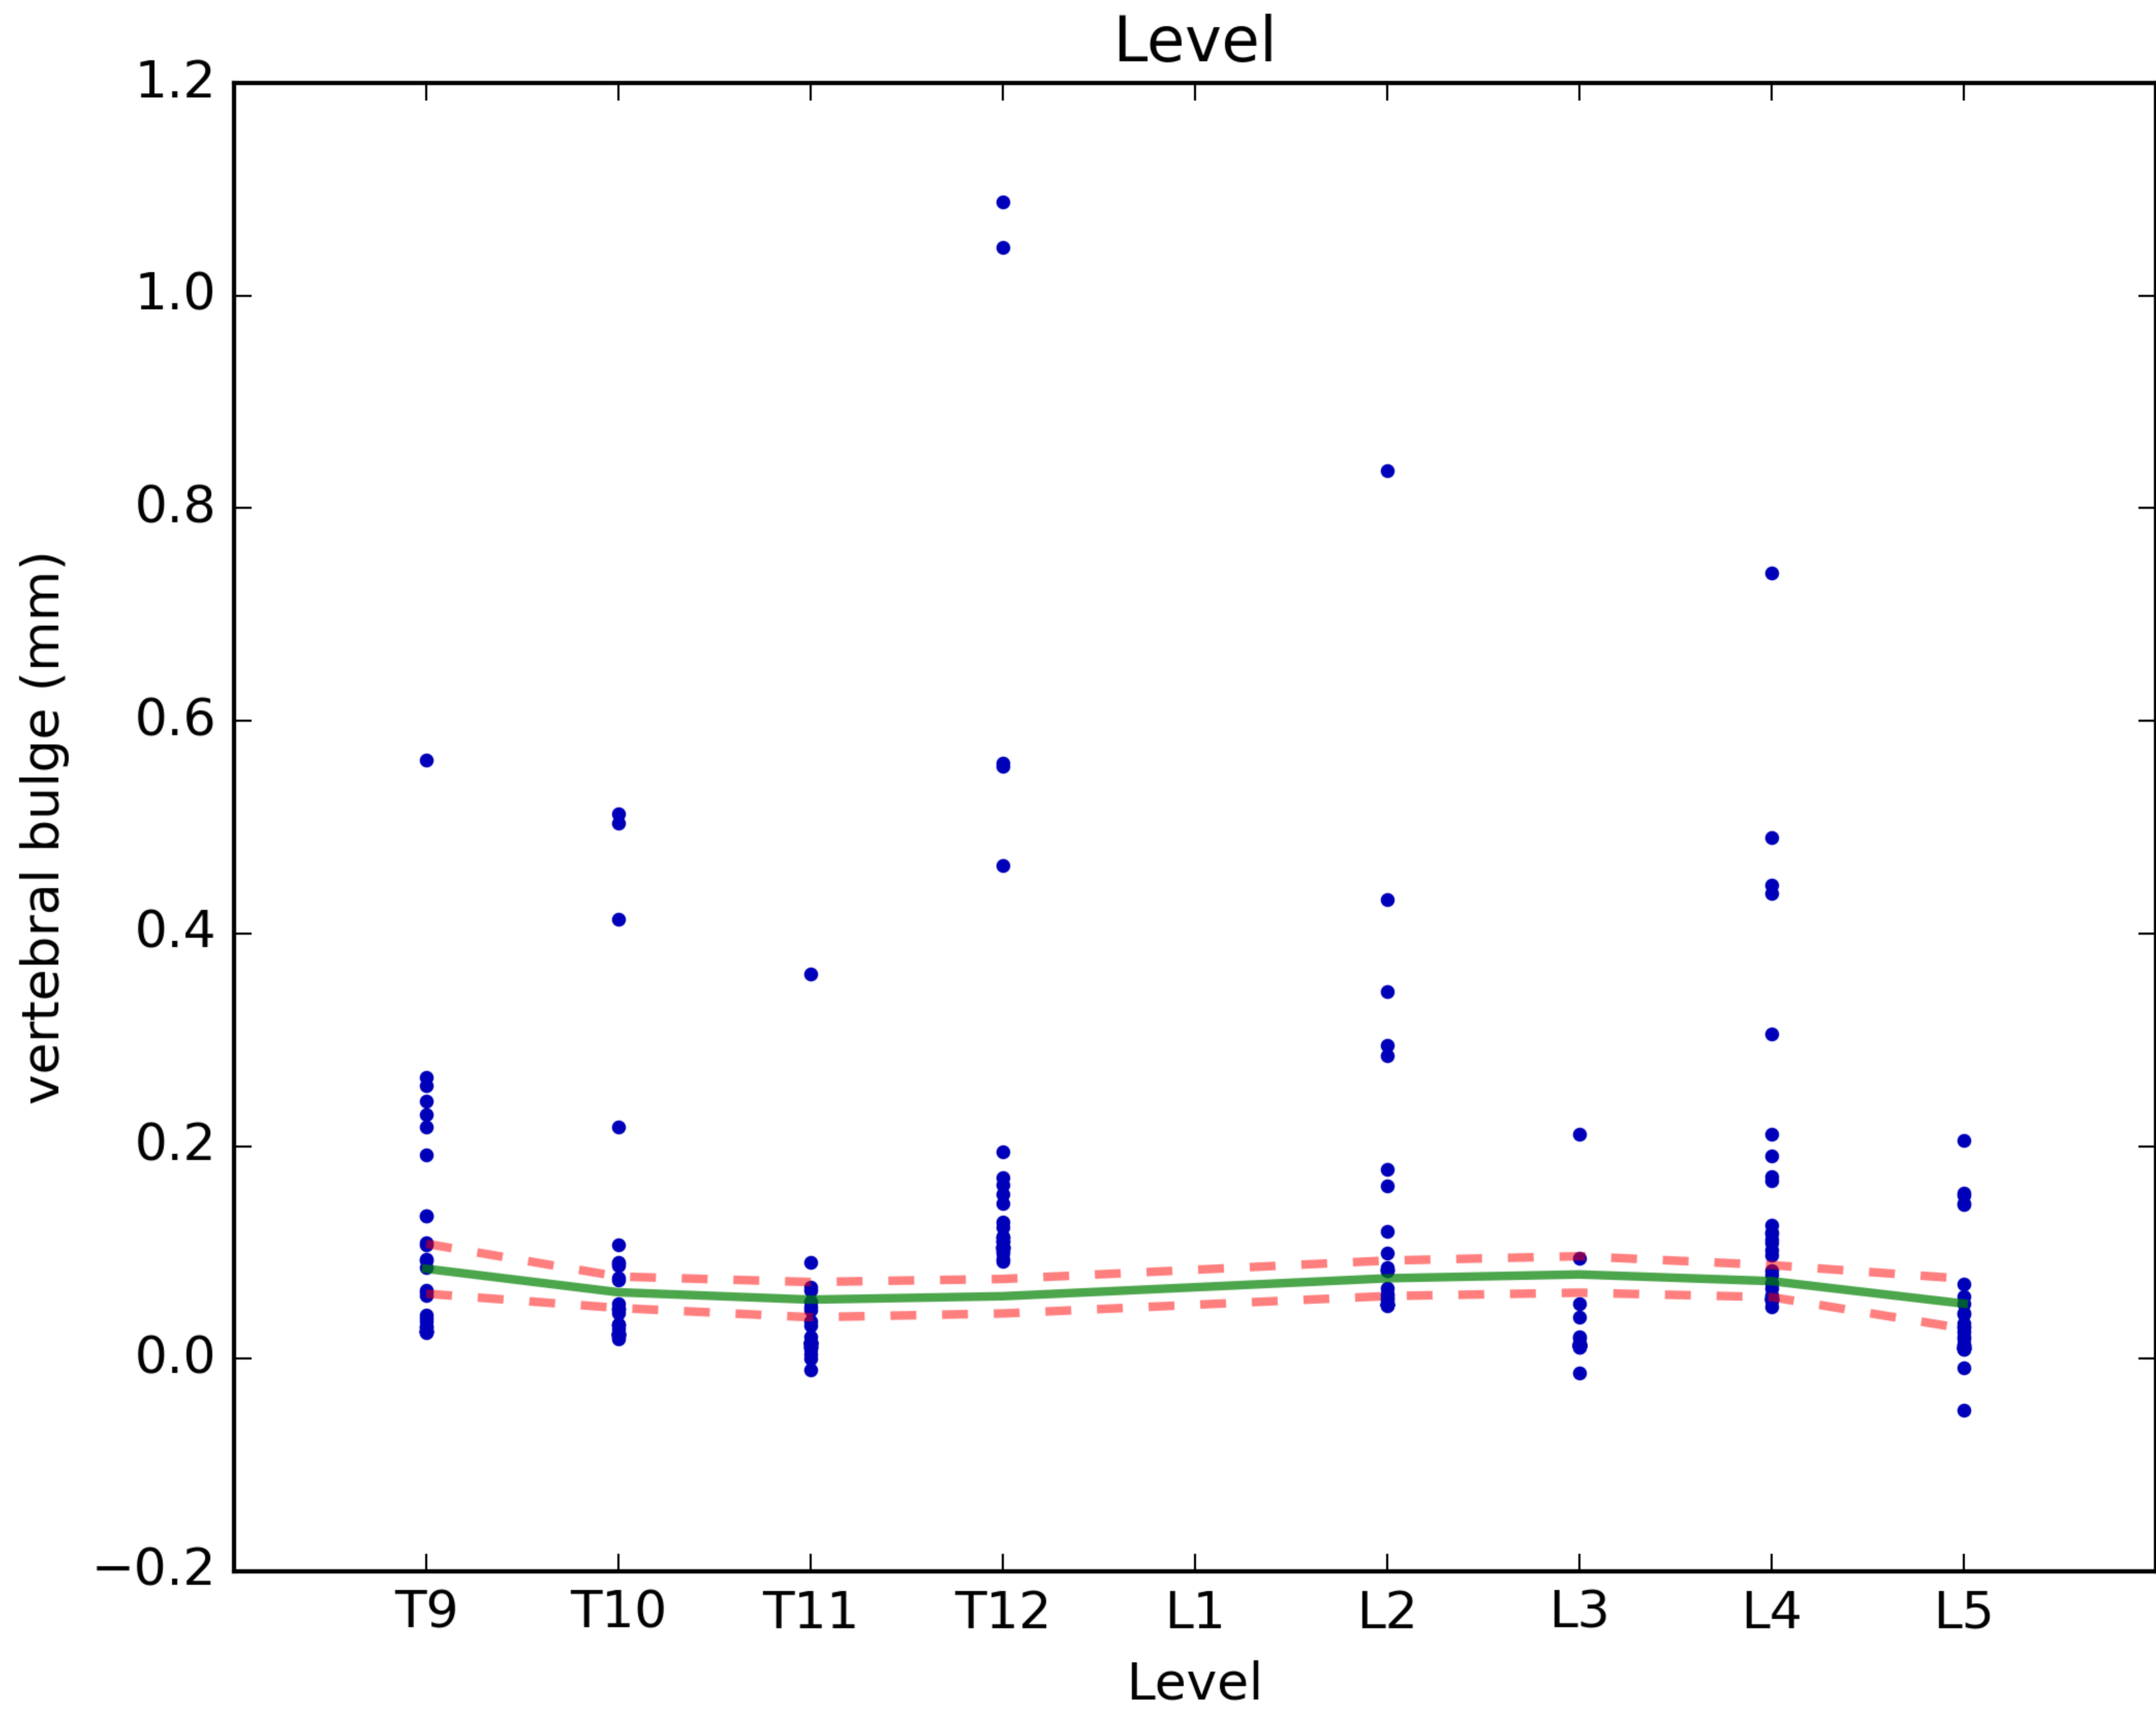

S3: Effect of the tumor size (in mm) in determining the load-induced canal narrowing

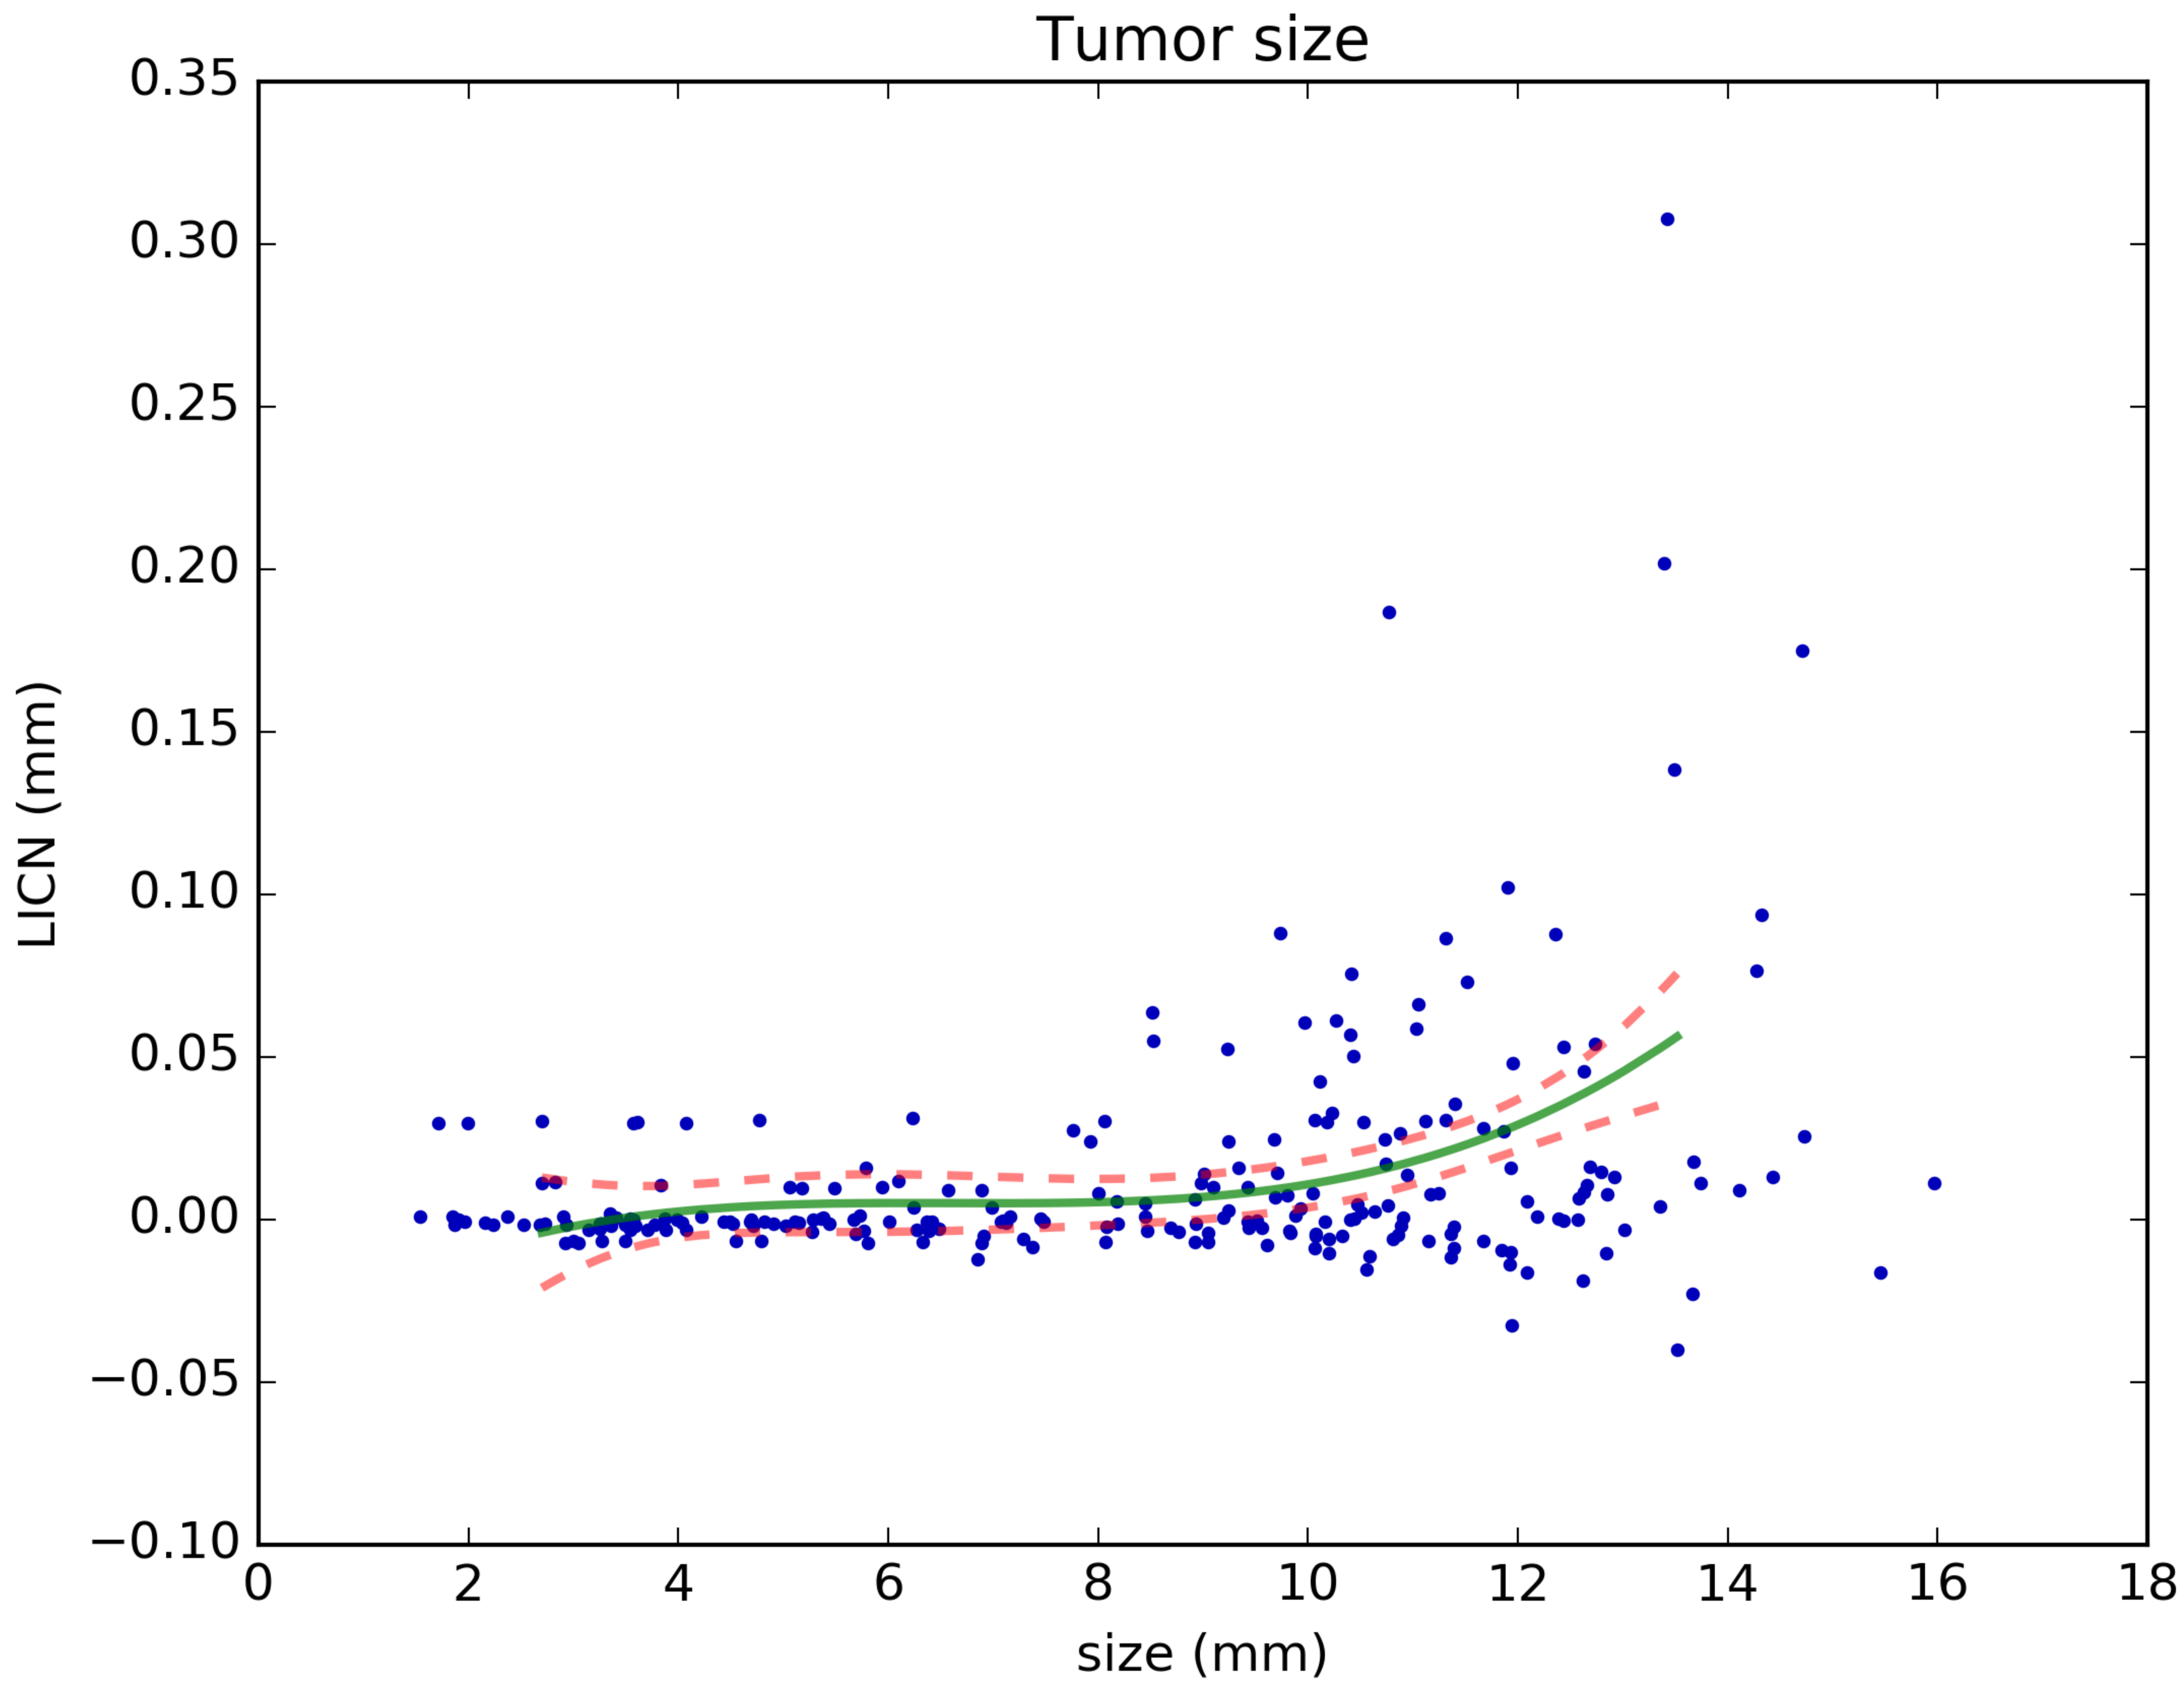

S3: Effect of the tumor size (in mm<sup>3</sup>) in determining the load-induced canal narrowing

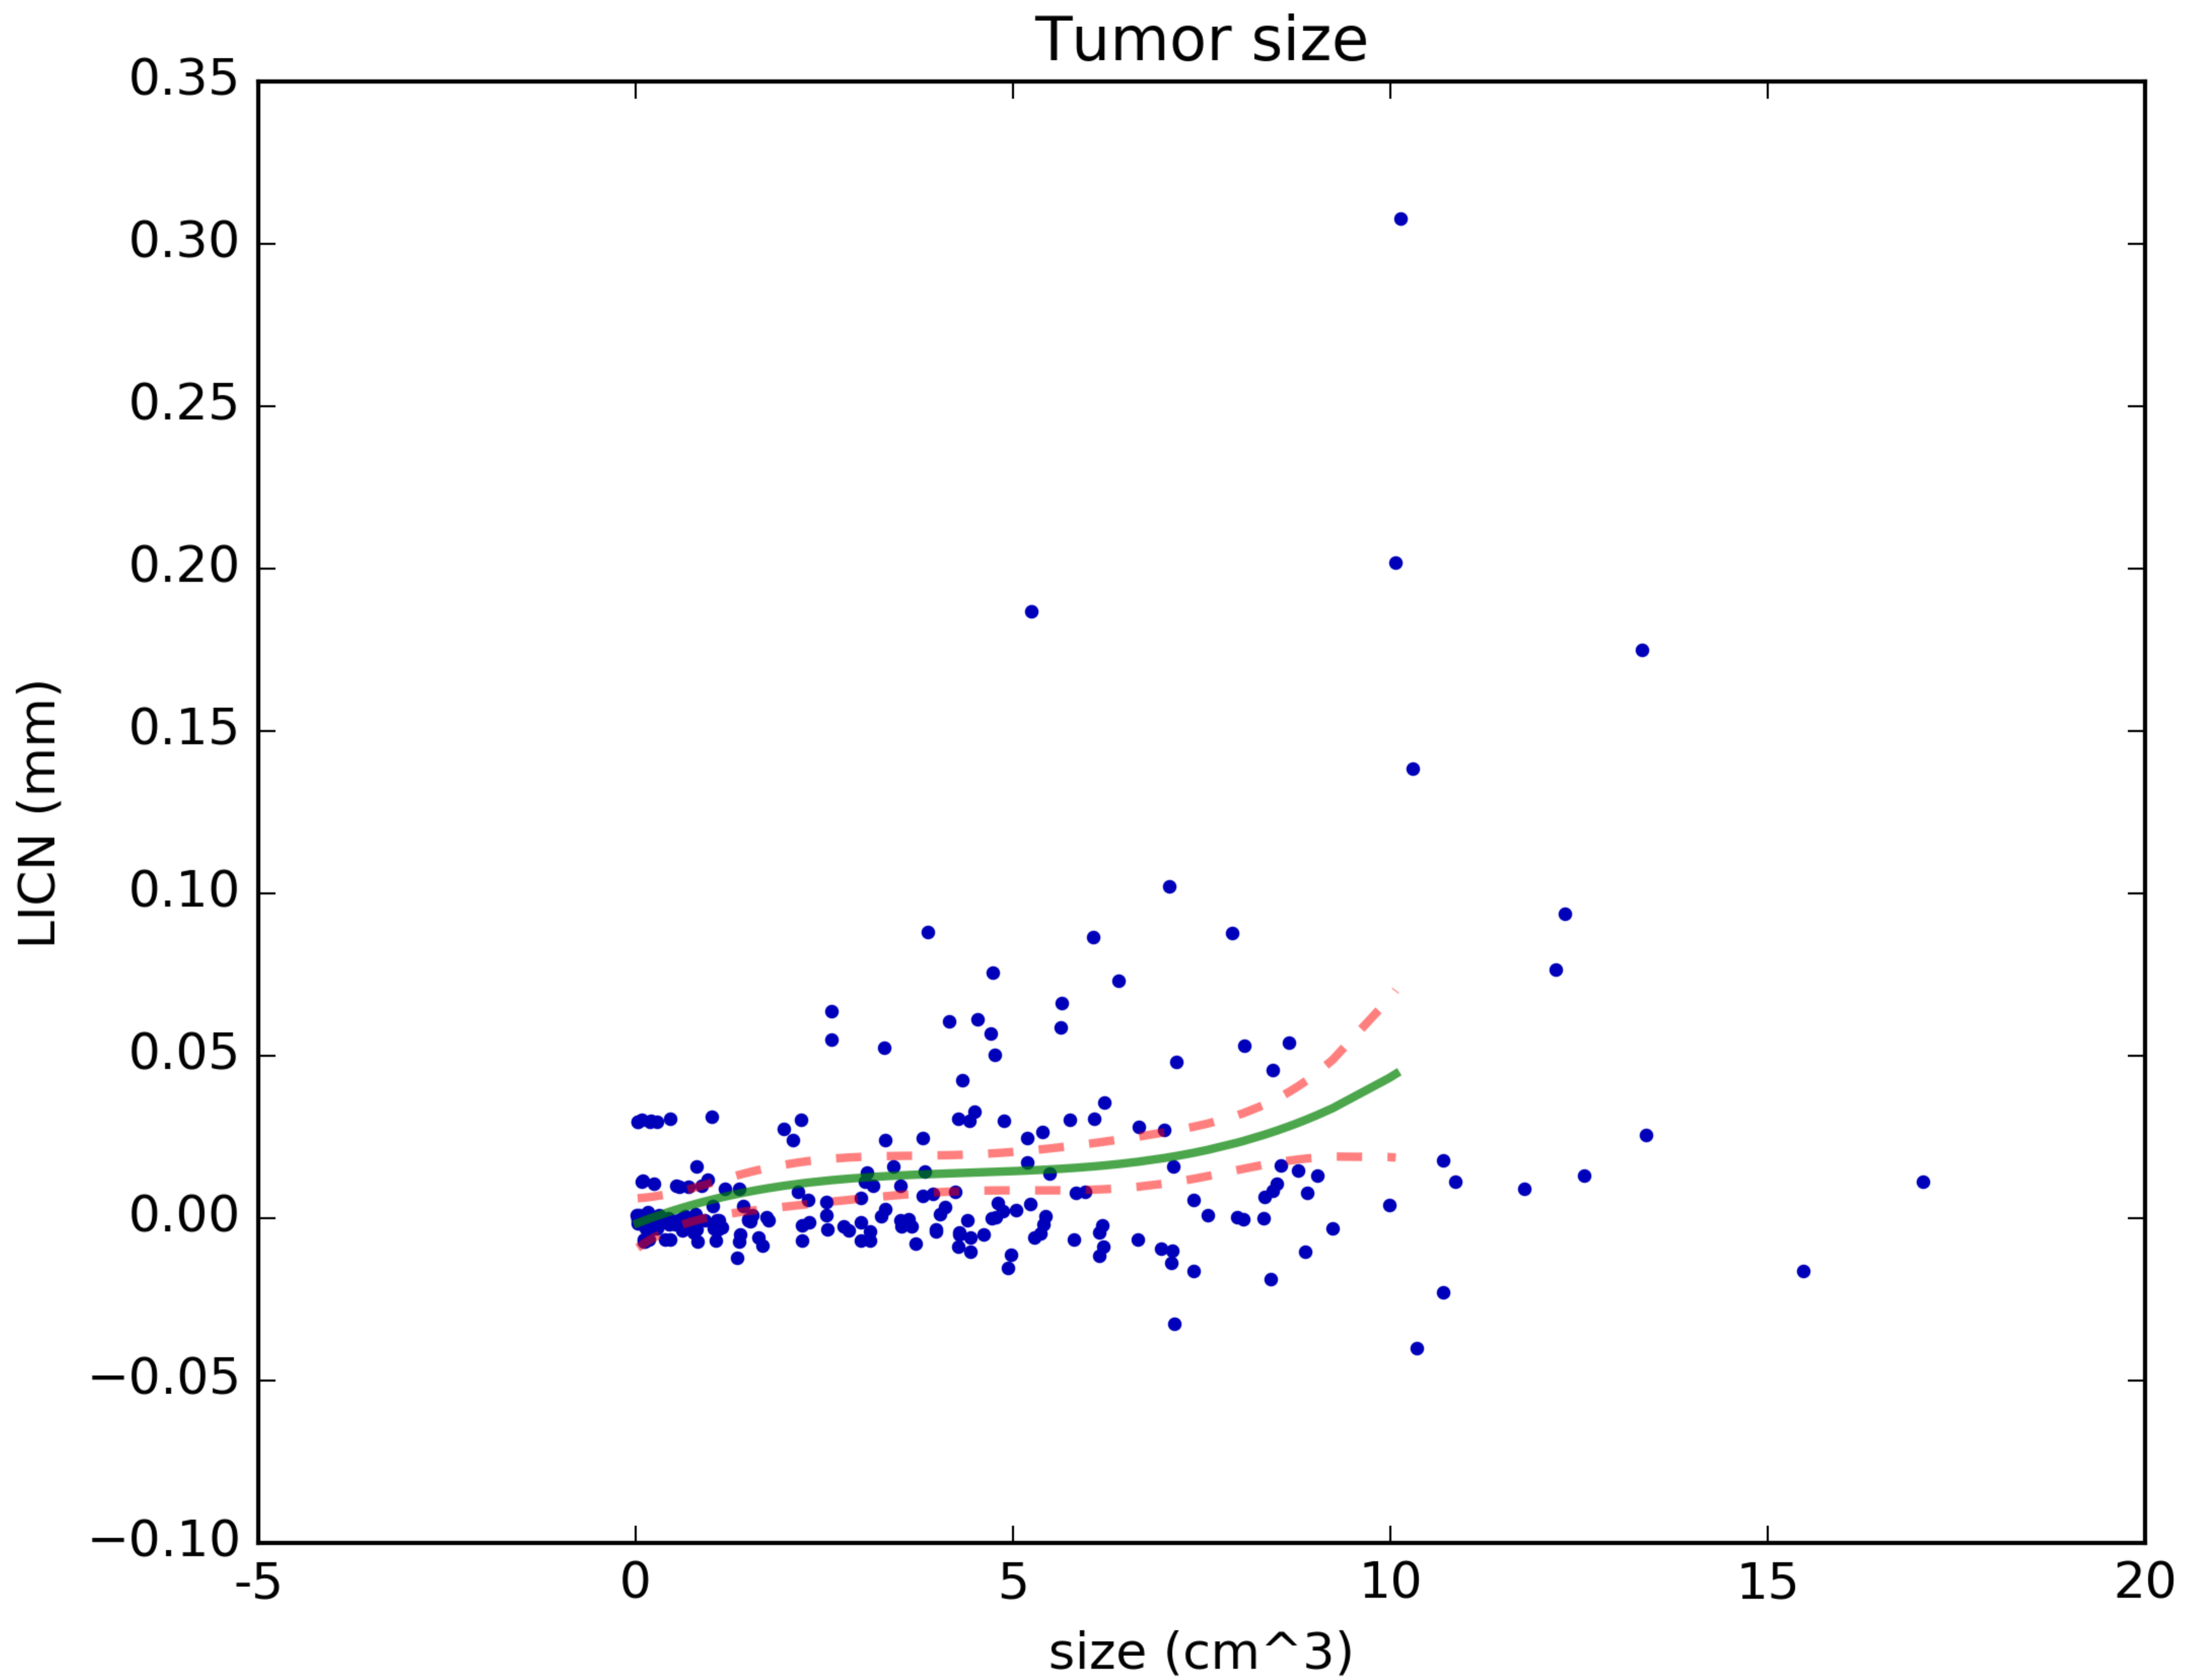





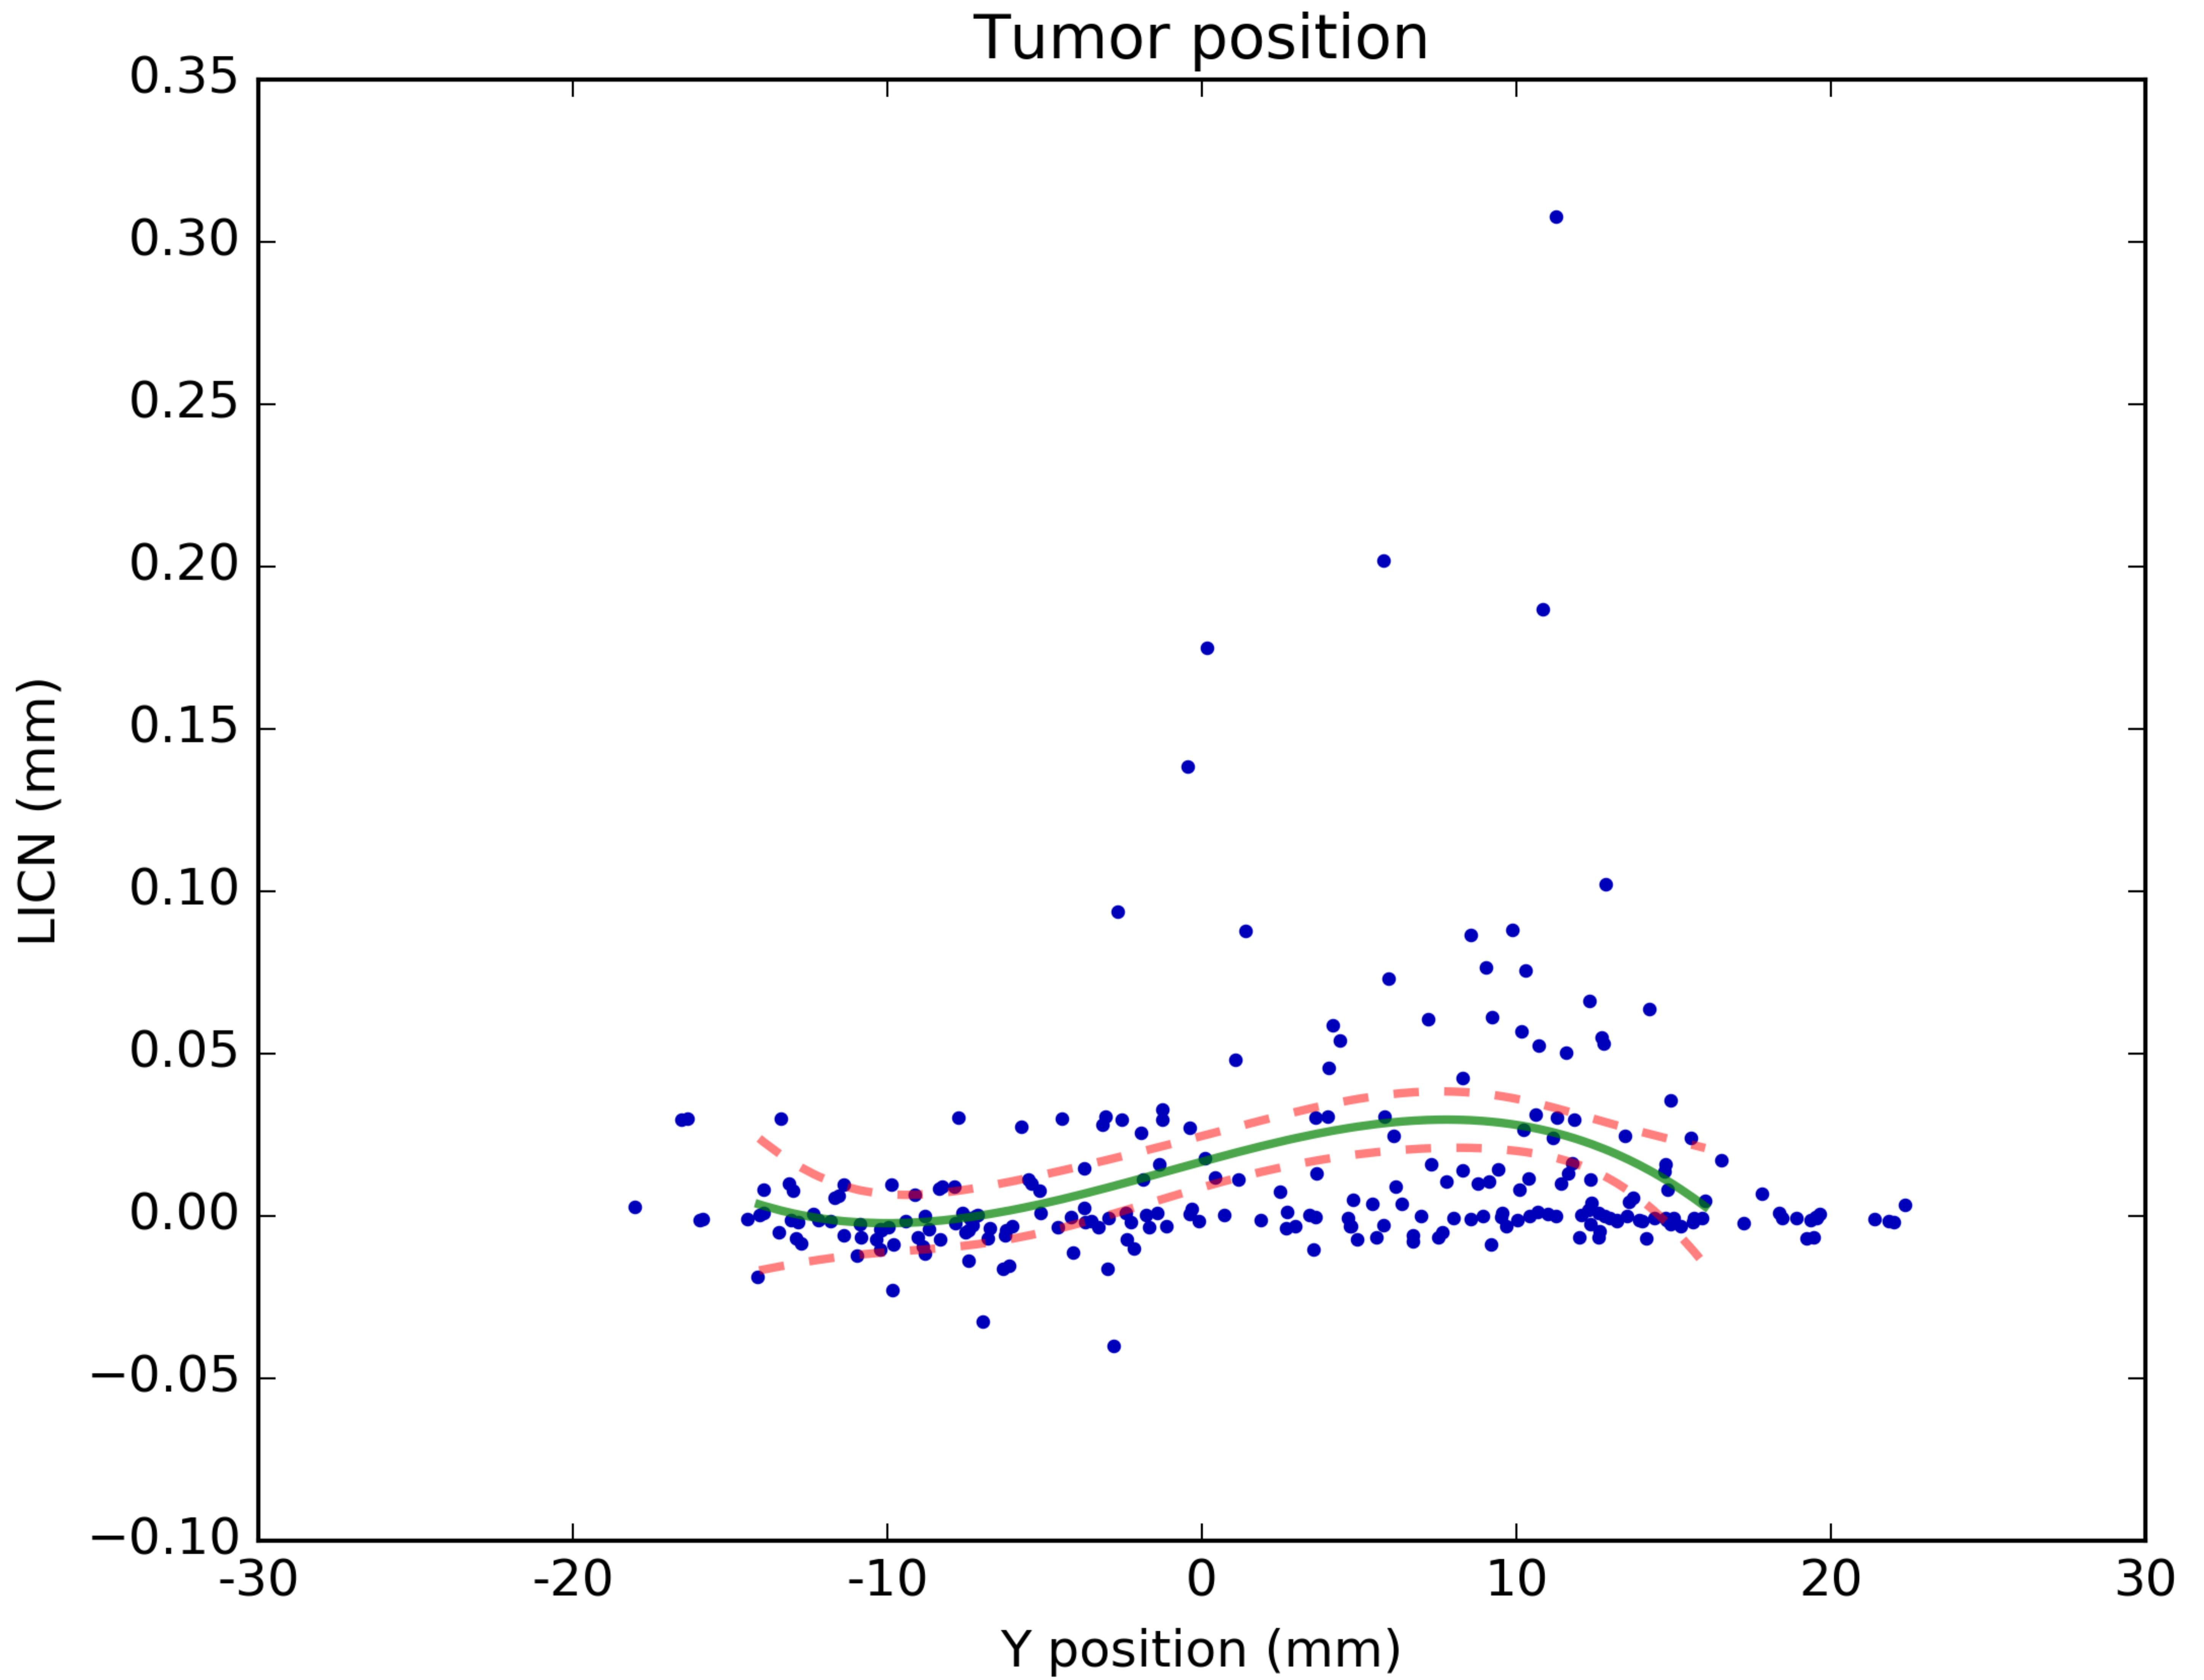

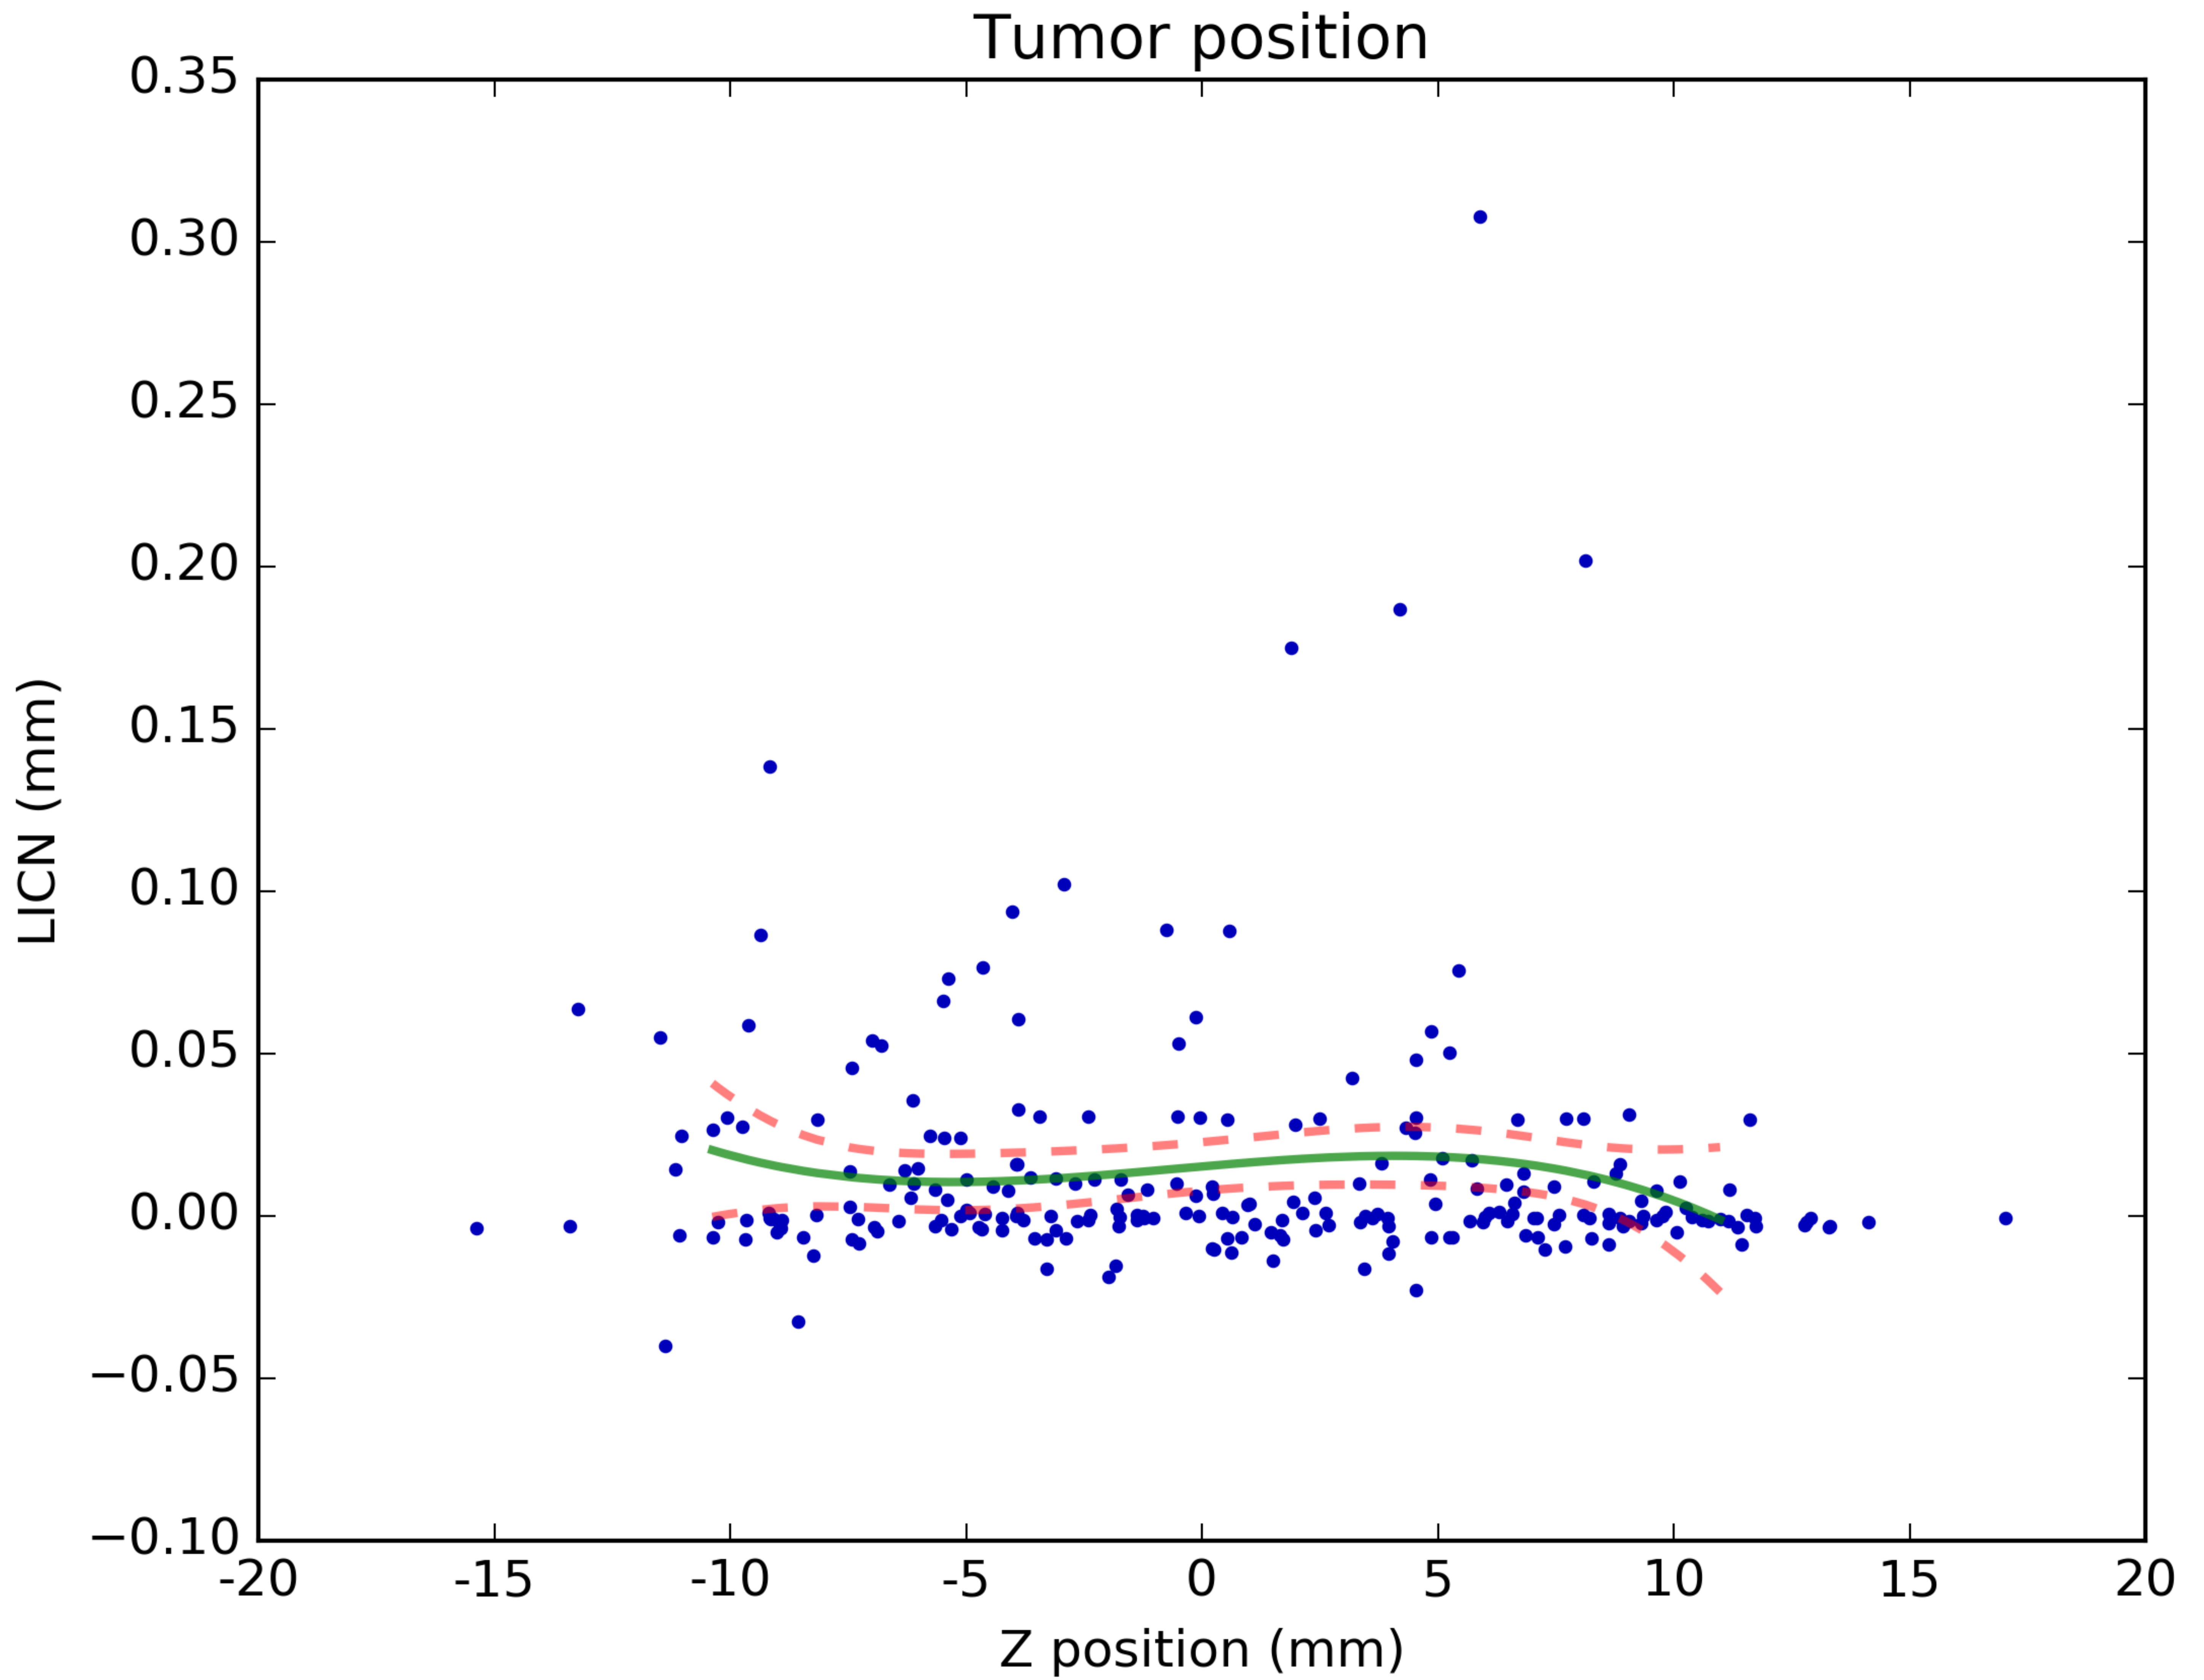

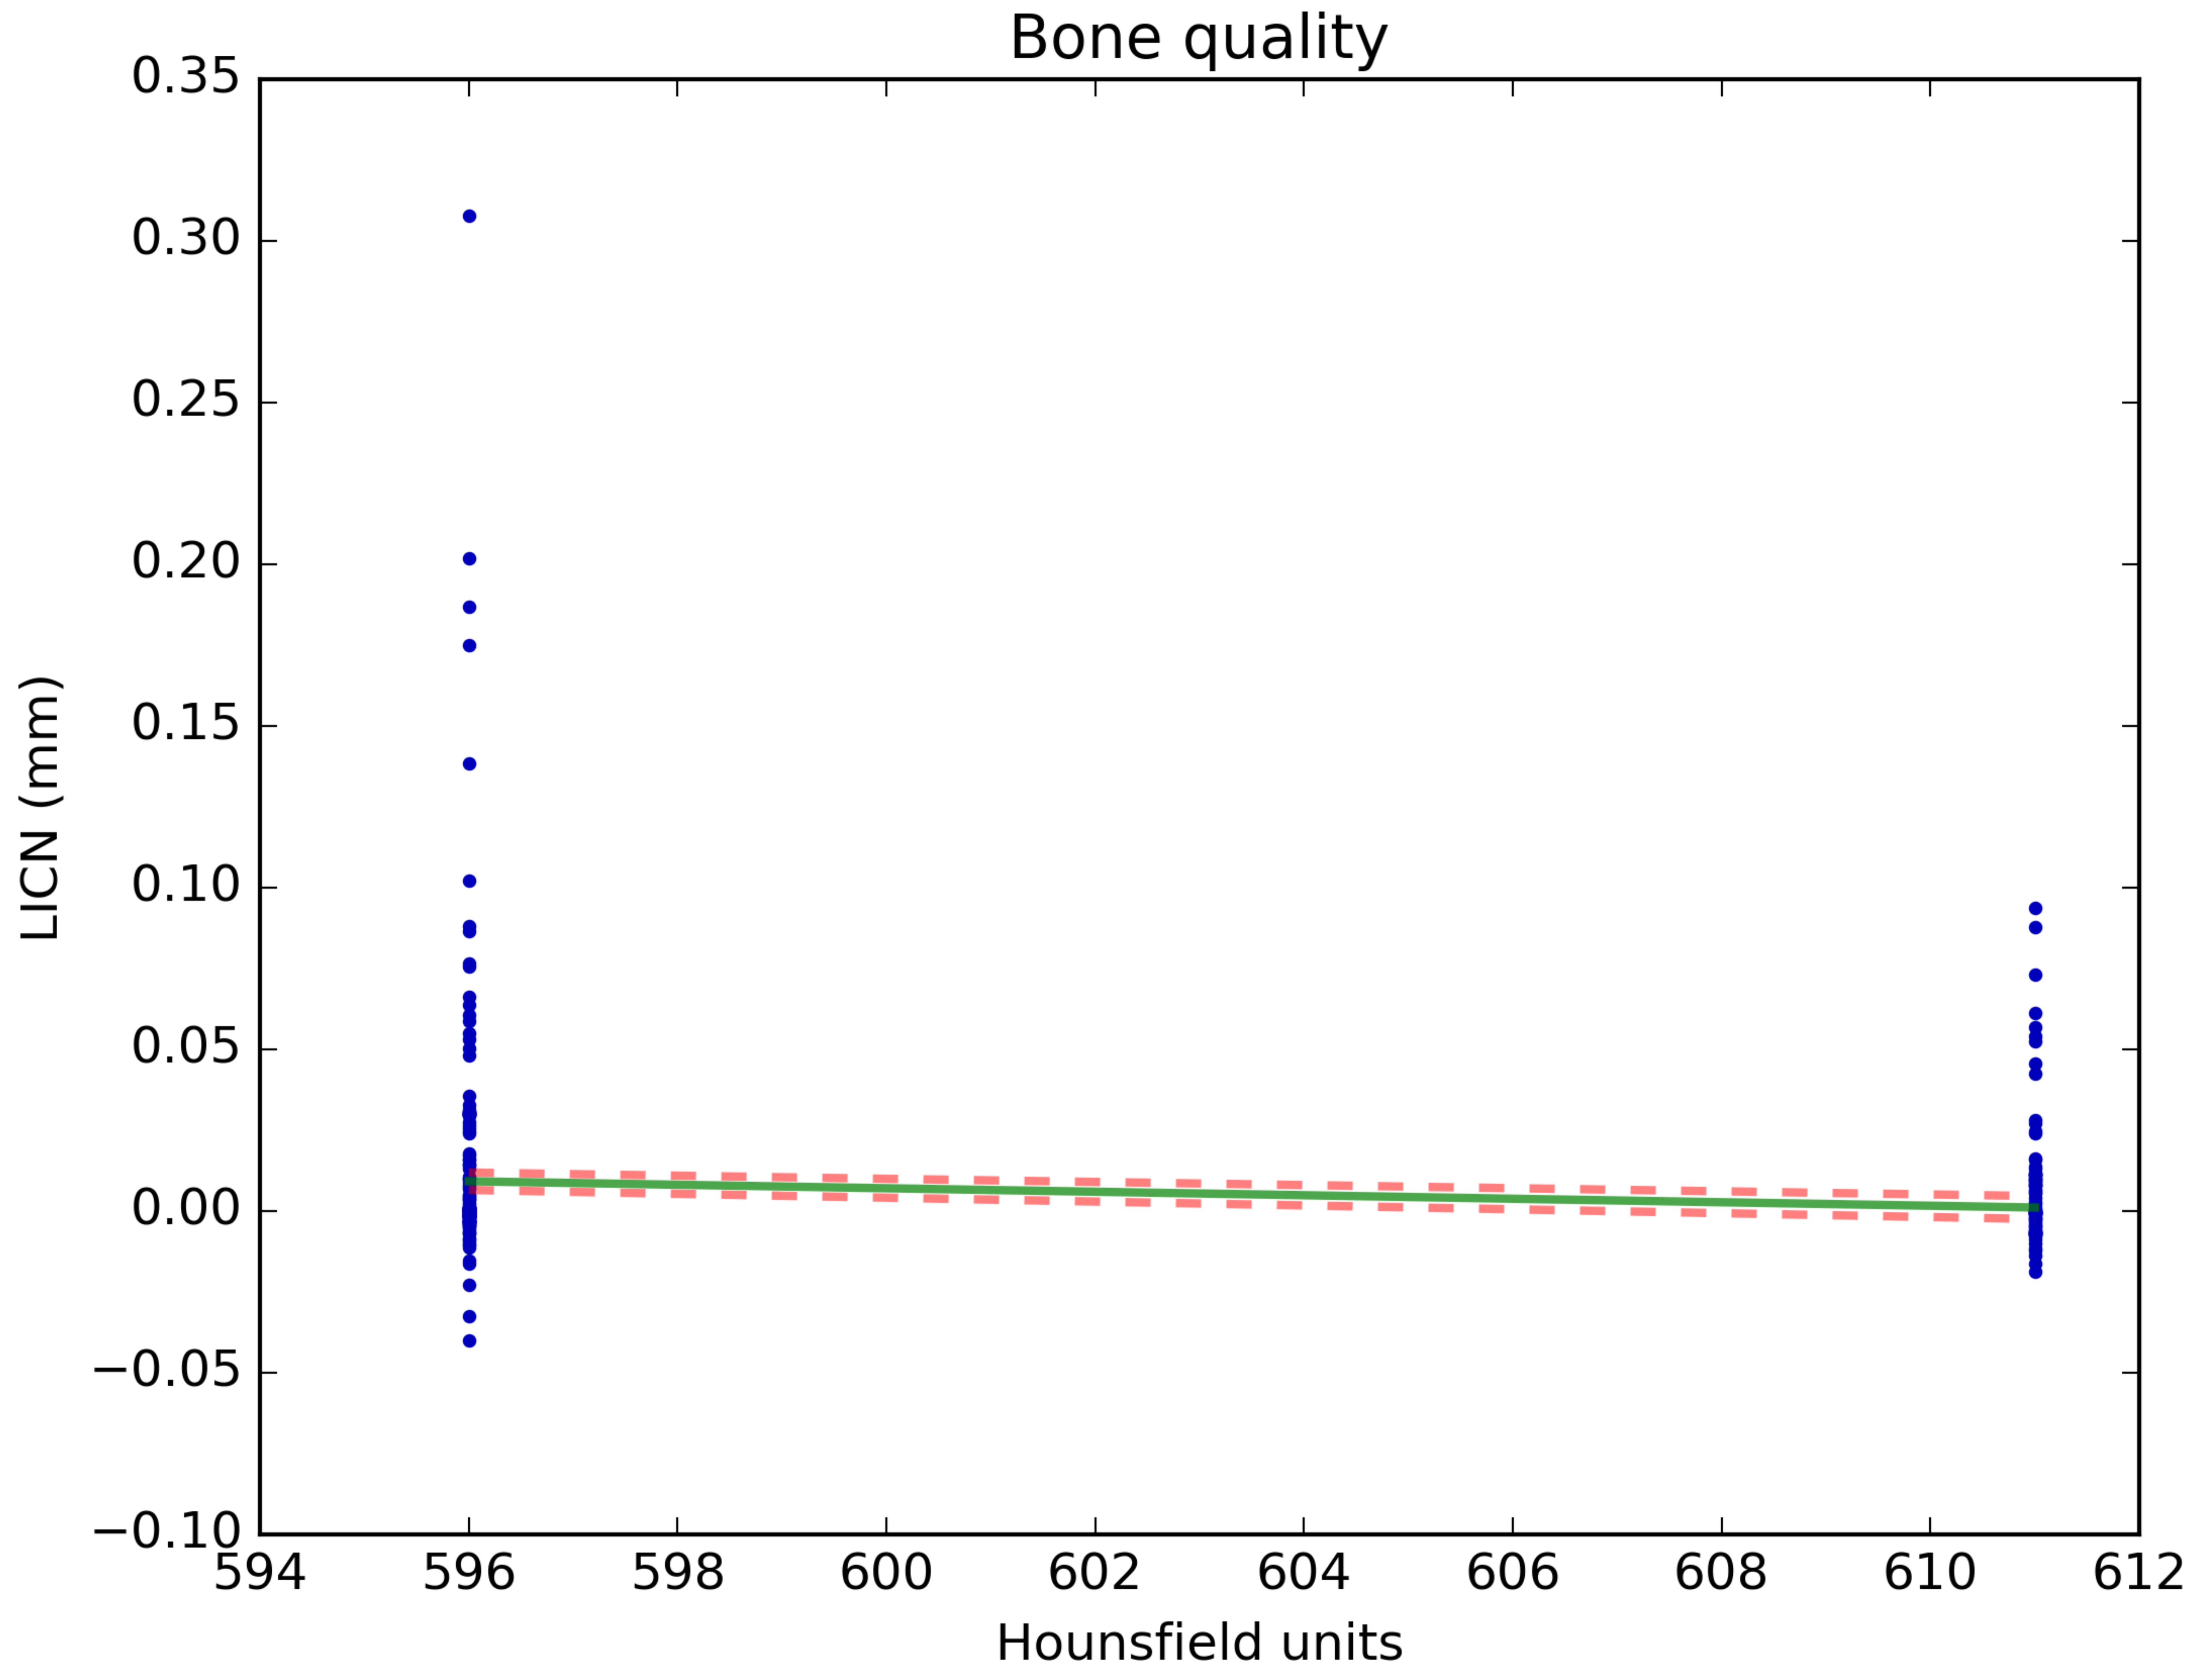

S3: Effect of the vertebral level in determining the load-induced canal narrowing

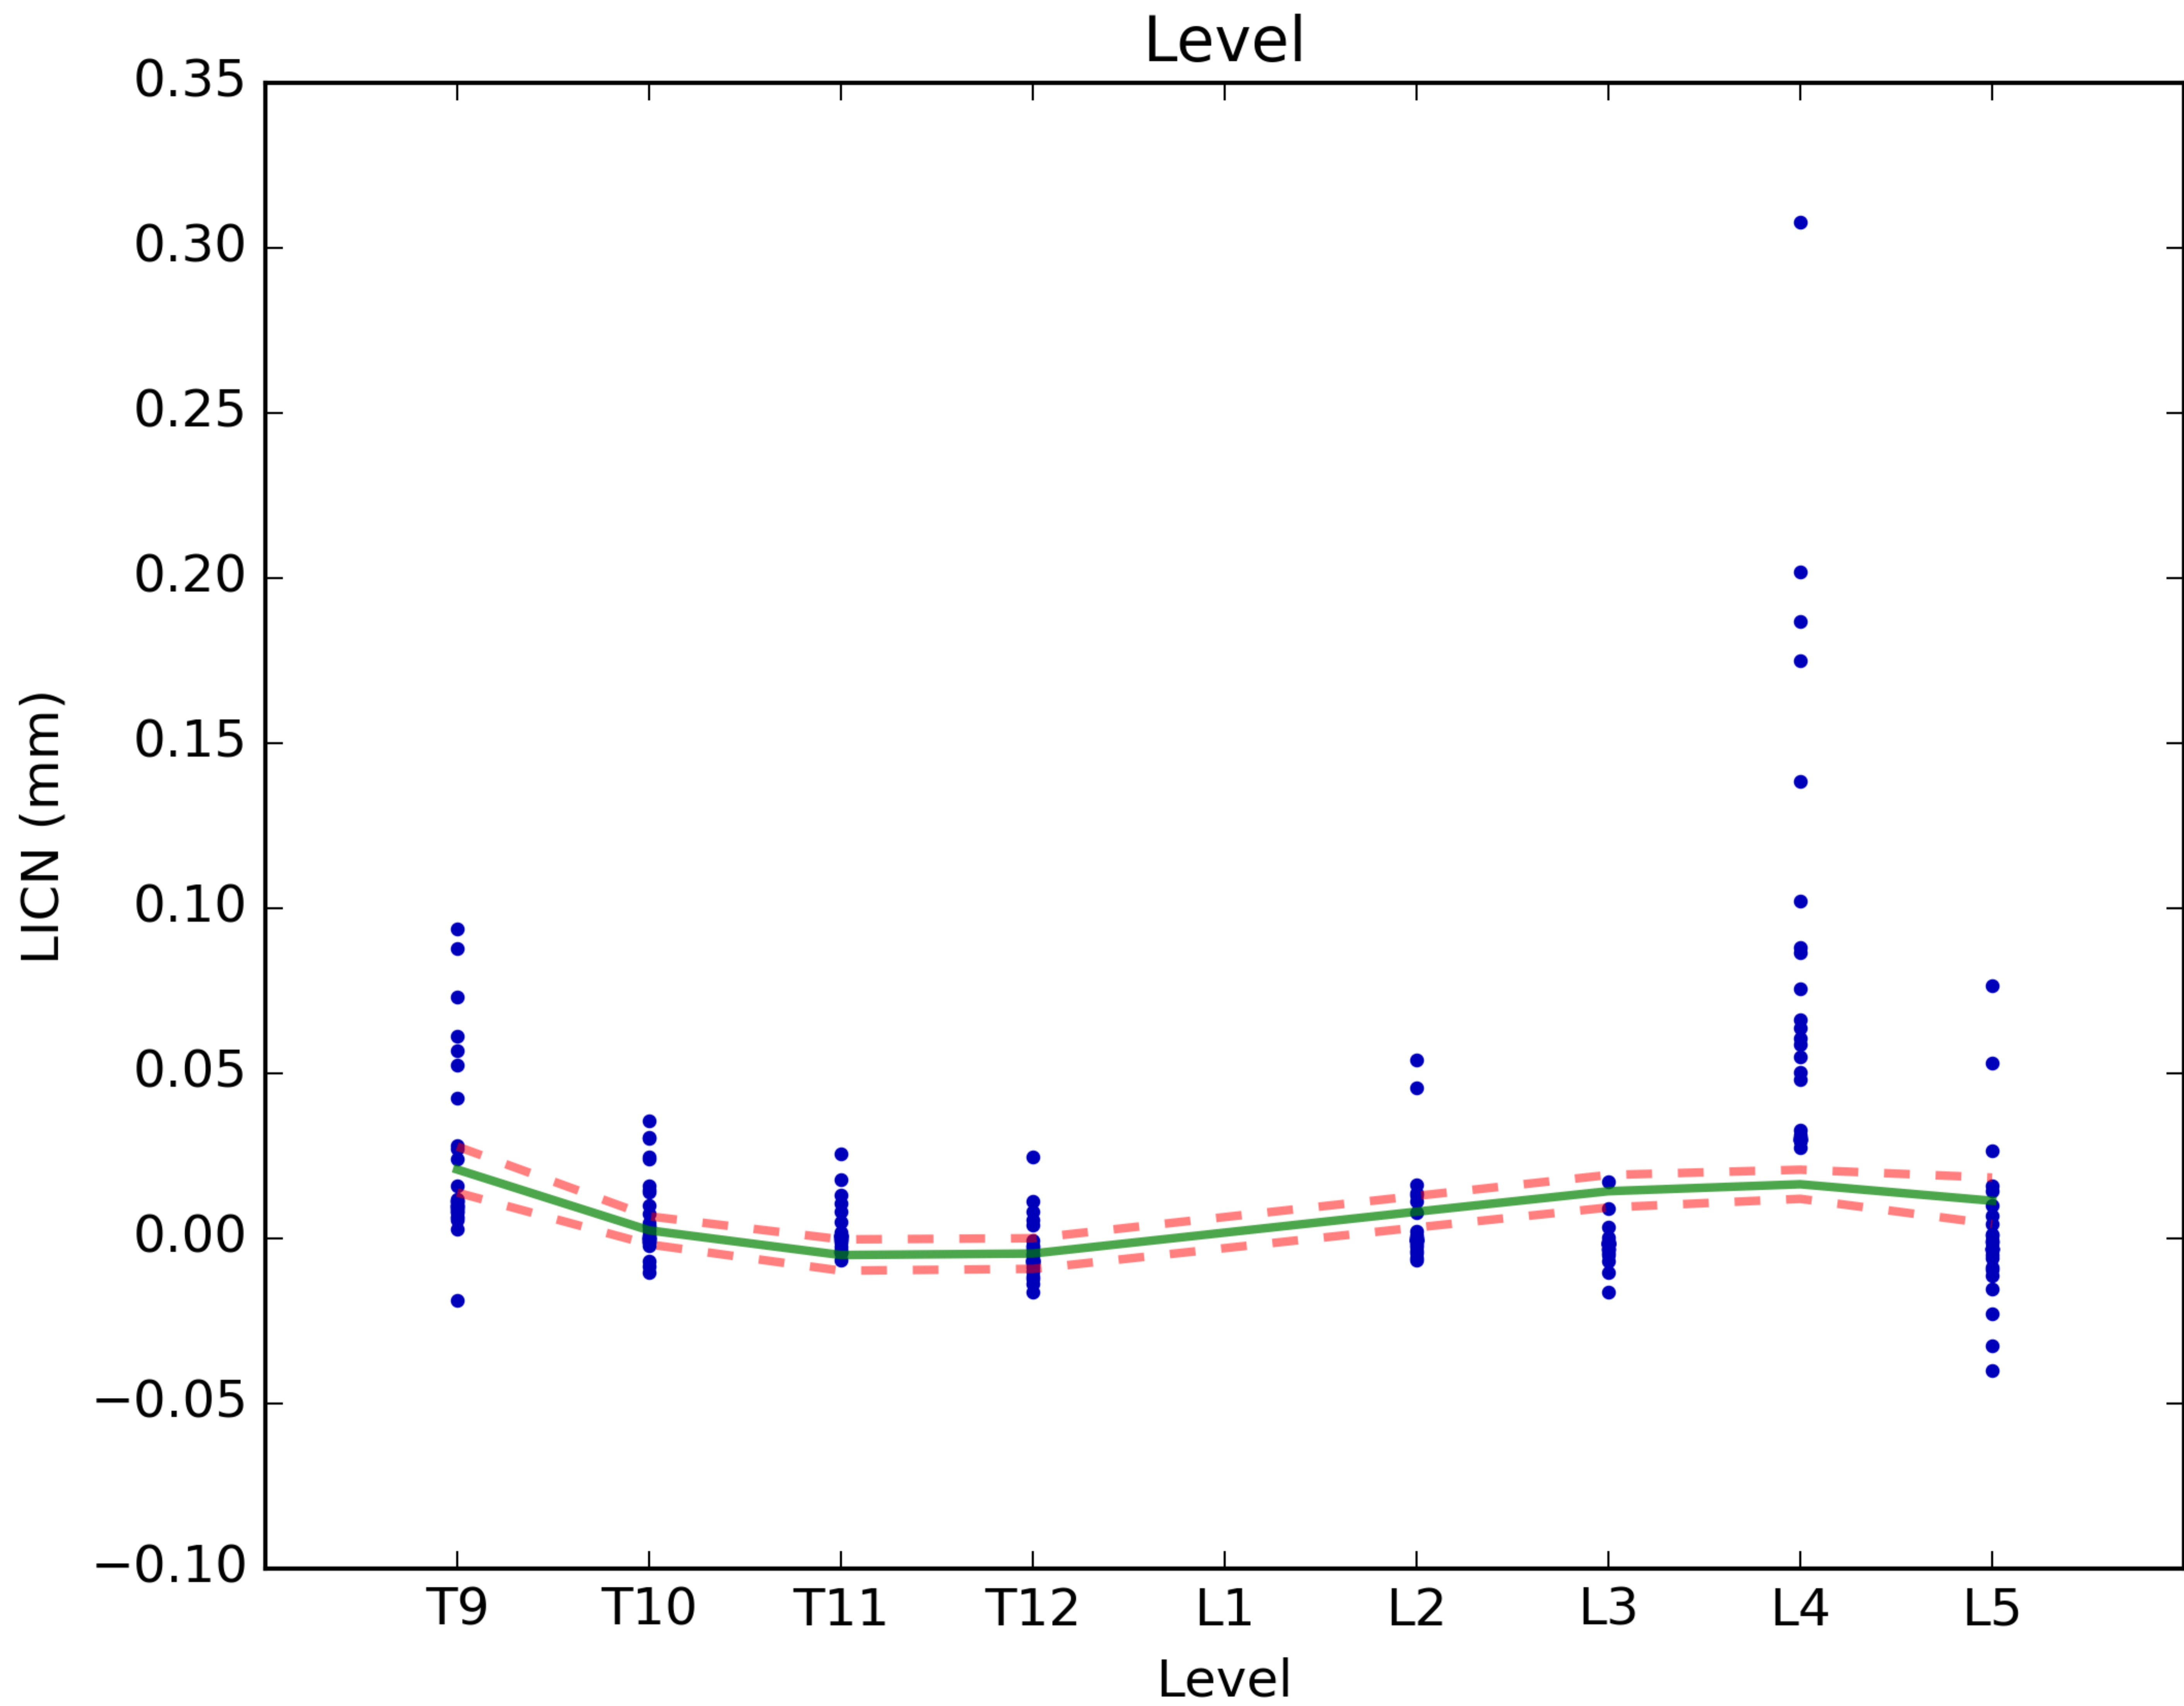

Supplement: mmc3.pdf [file mmc3.pdf]
