# Supplementary figures and images for: The Role of the Size and Location of the Tumors and of the Vertebral Anatomy in Determining the Structural Stability of the Metastatically Involved Spine: a Finite Element Study
Source: PubMed Central journal article supplement — Transl Oncol. 2018 Mar 28;11(3):639–46. doi: 10.1016/j.tranon.2018.03.002 (PMC6054594; doi:10.1016/j.tranon.2018.03.002), 2018-03-28

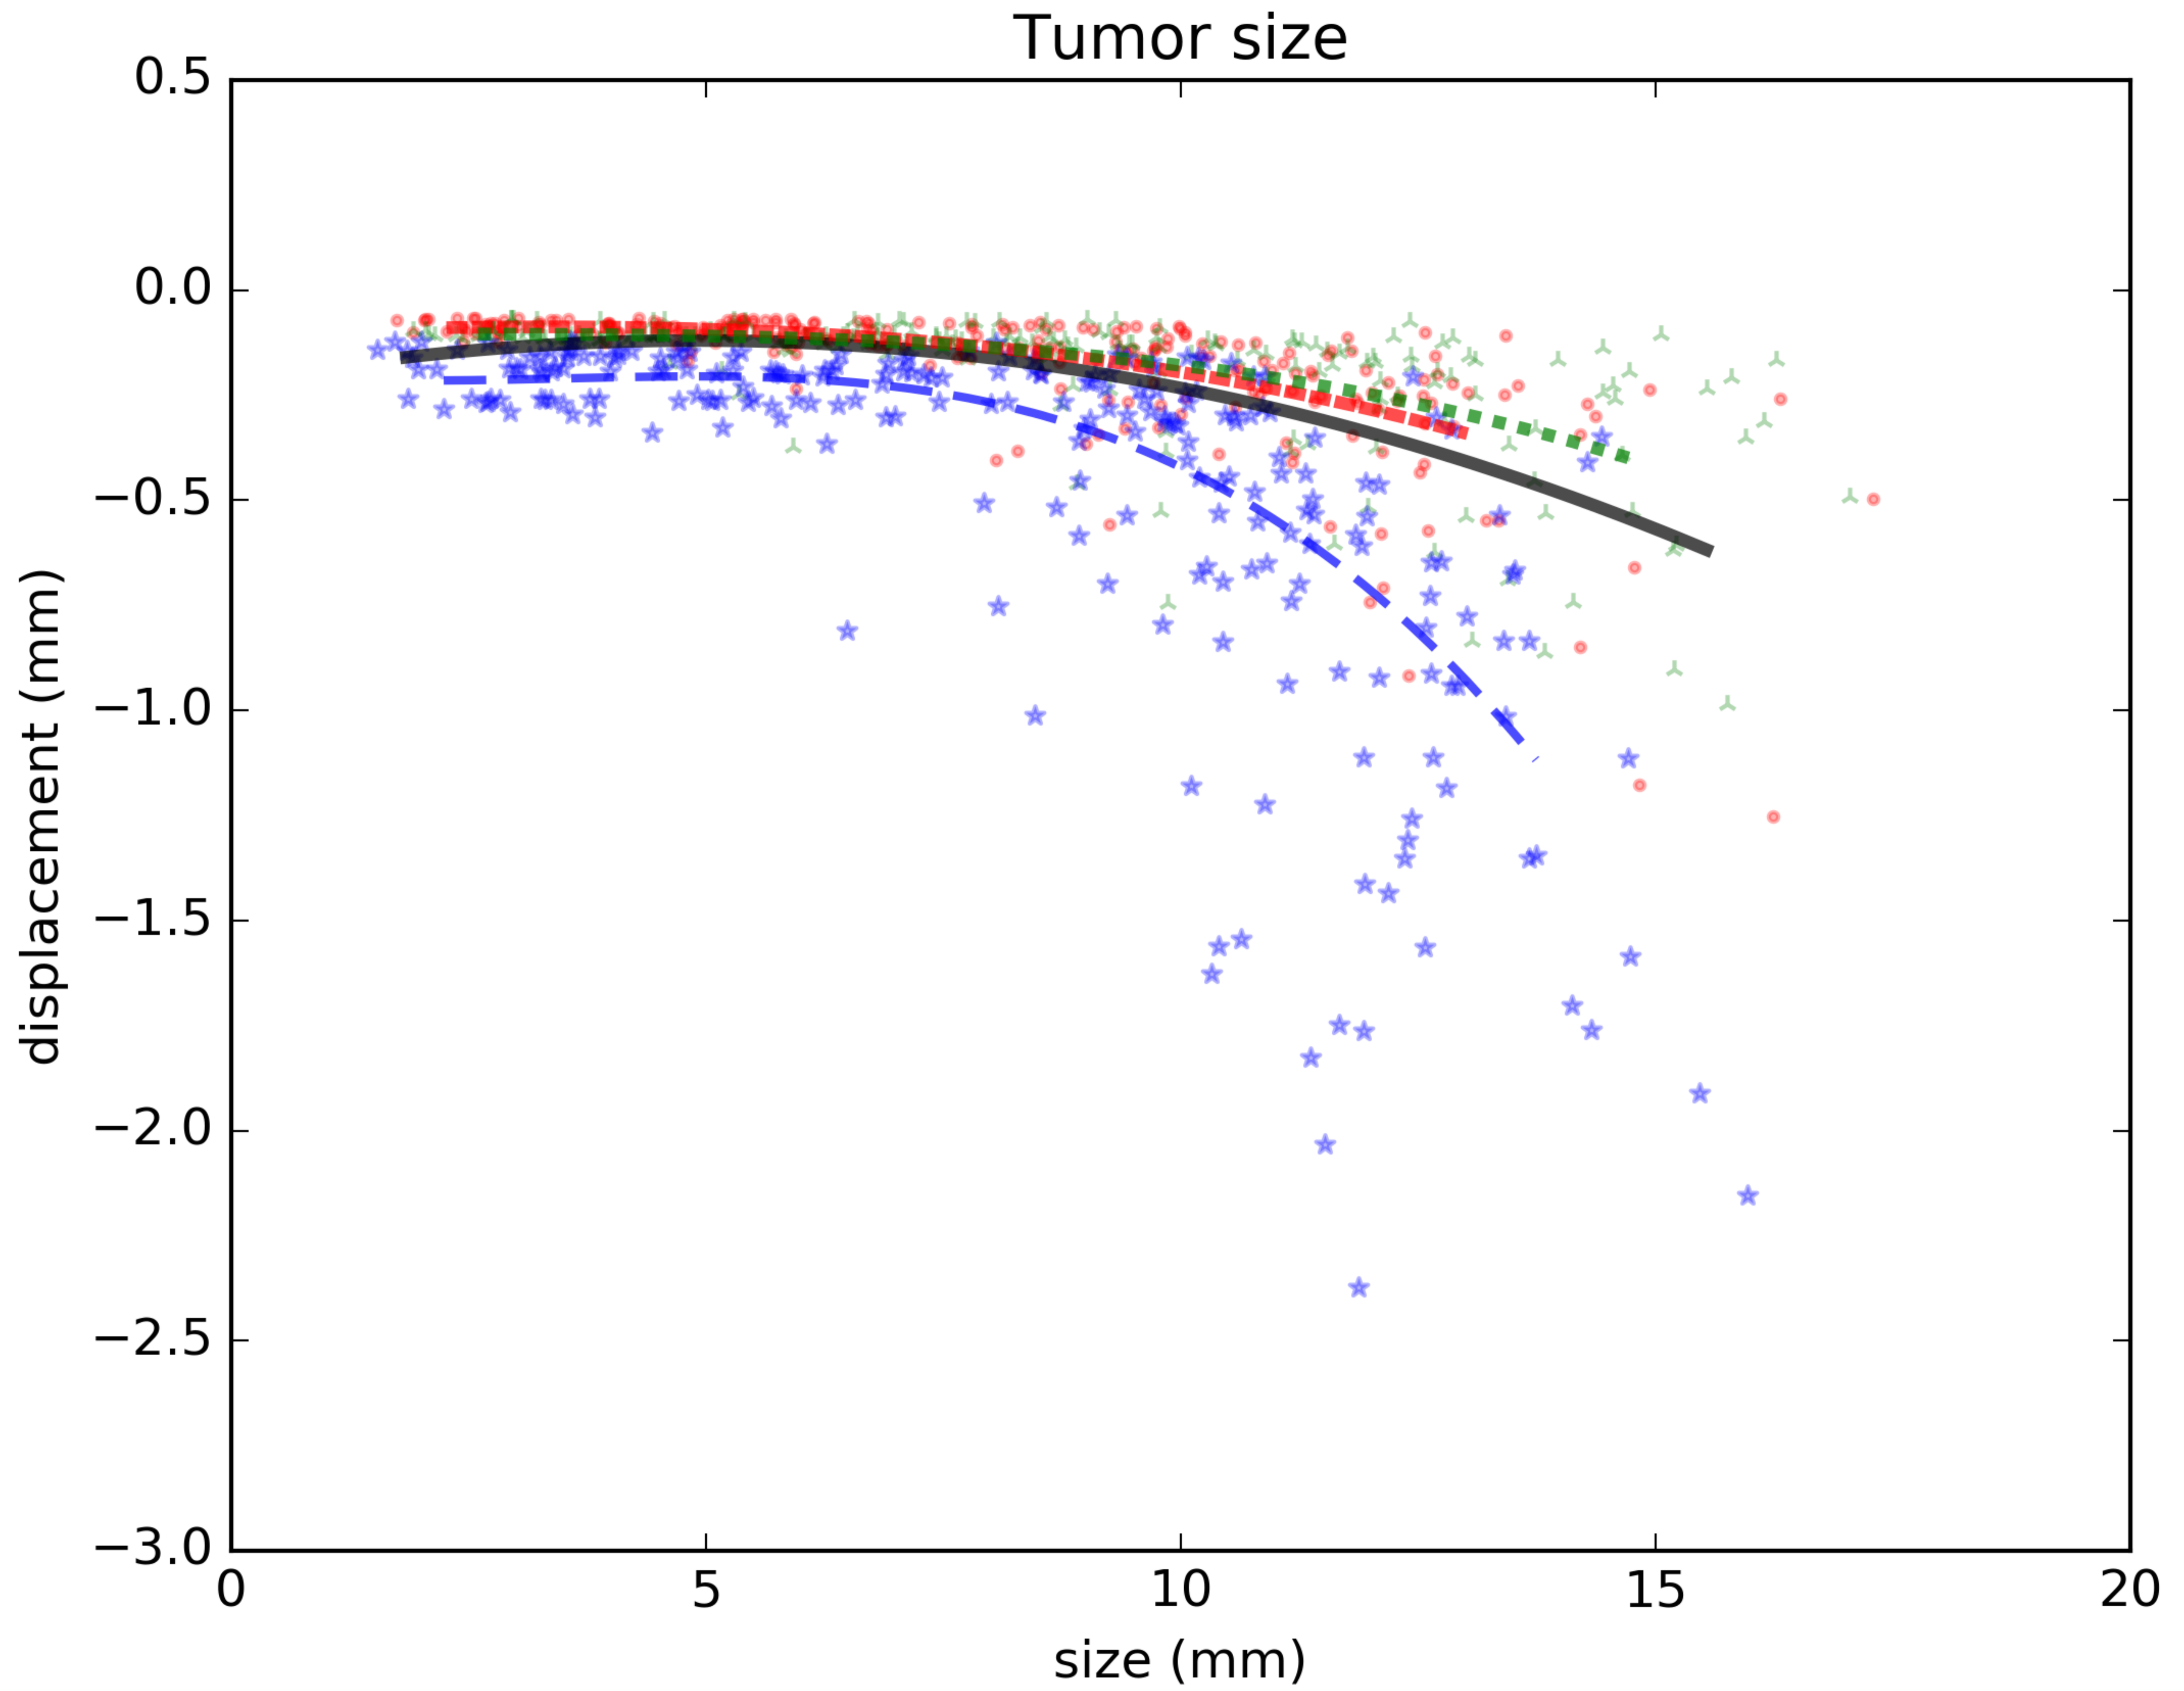

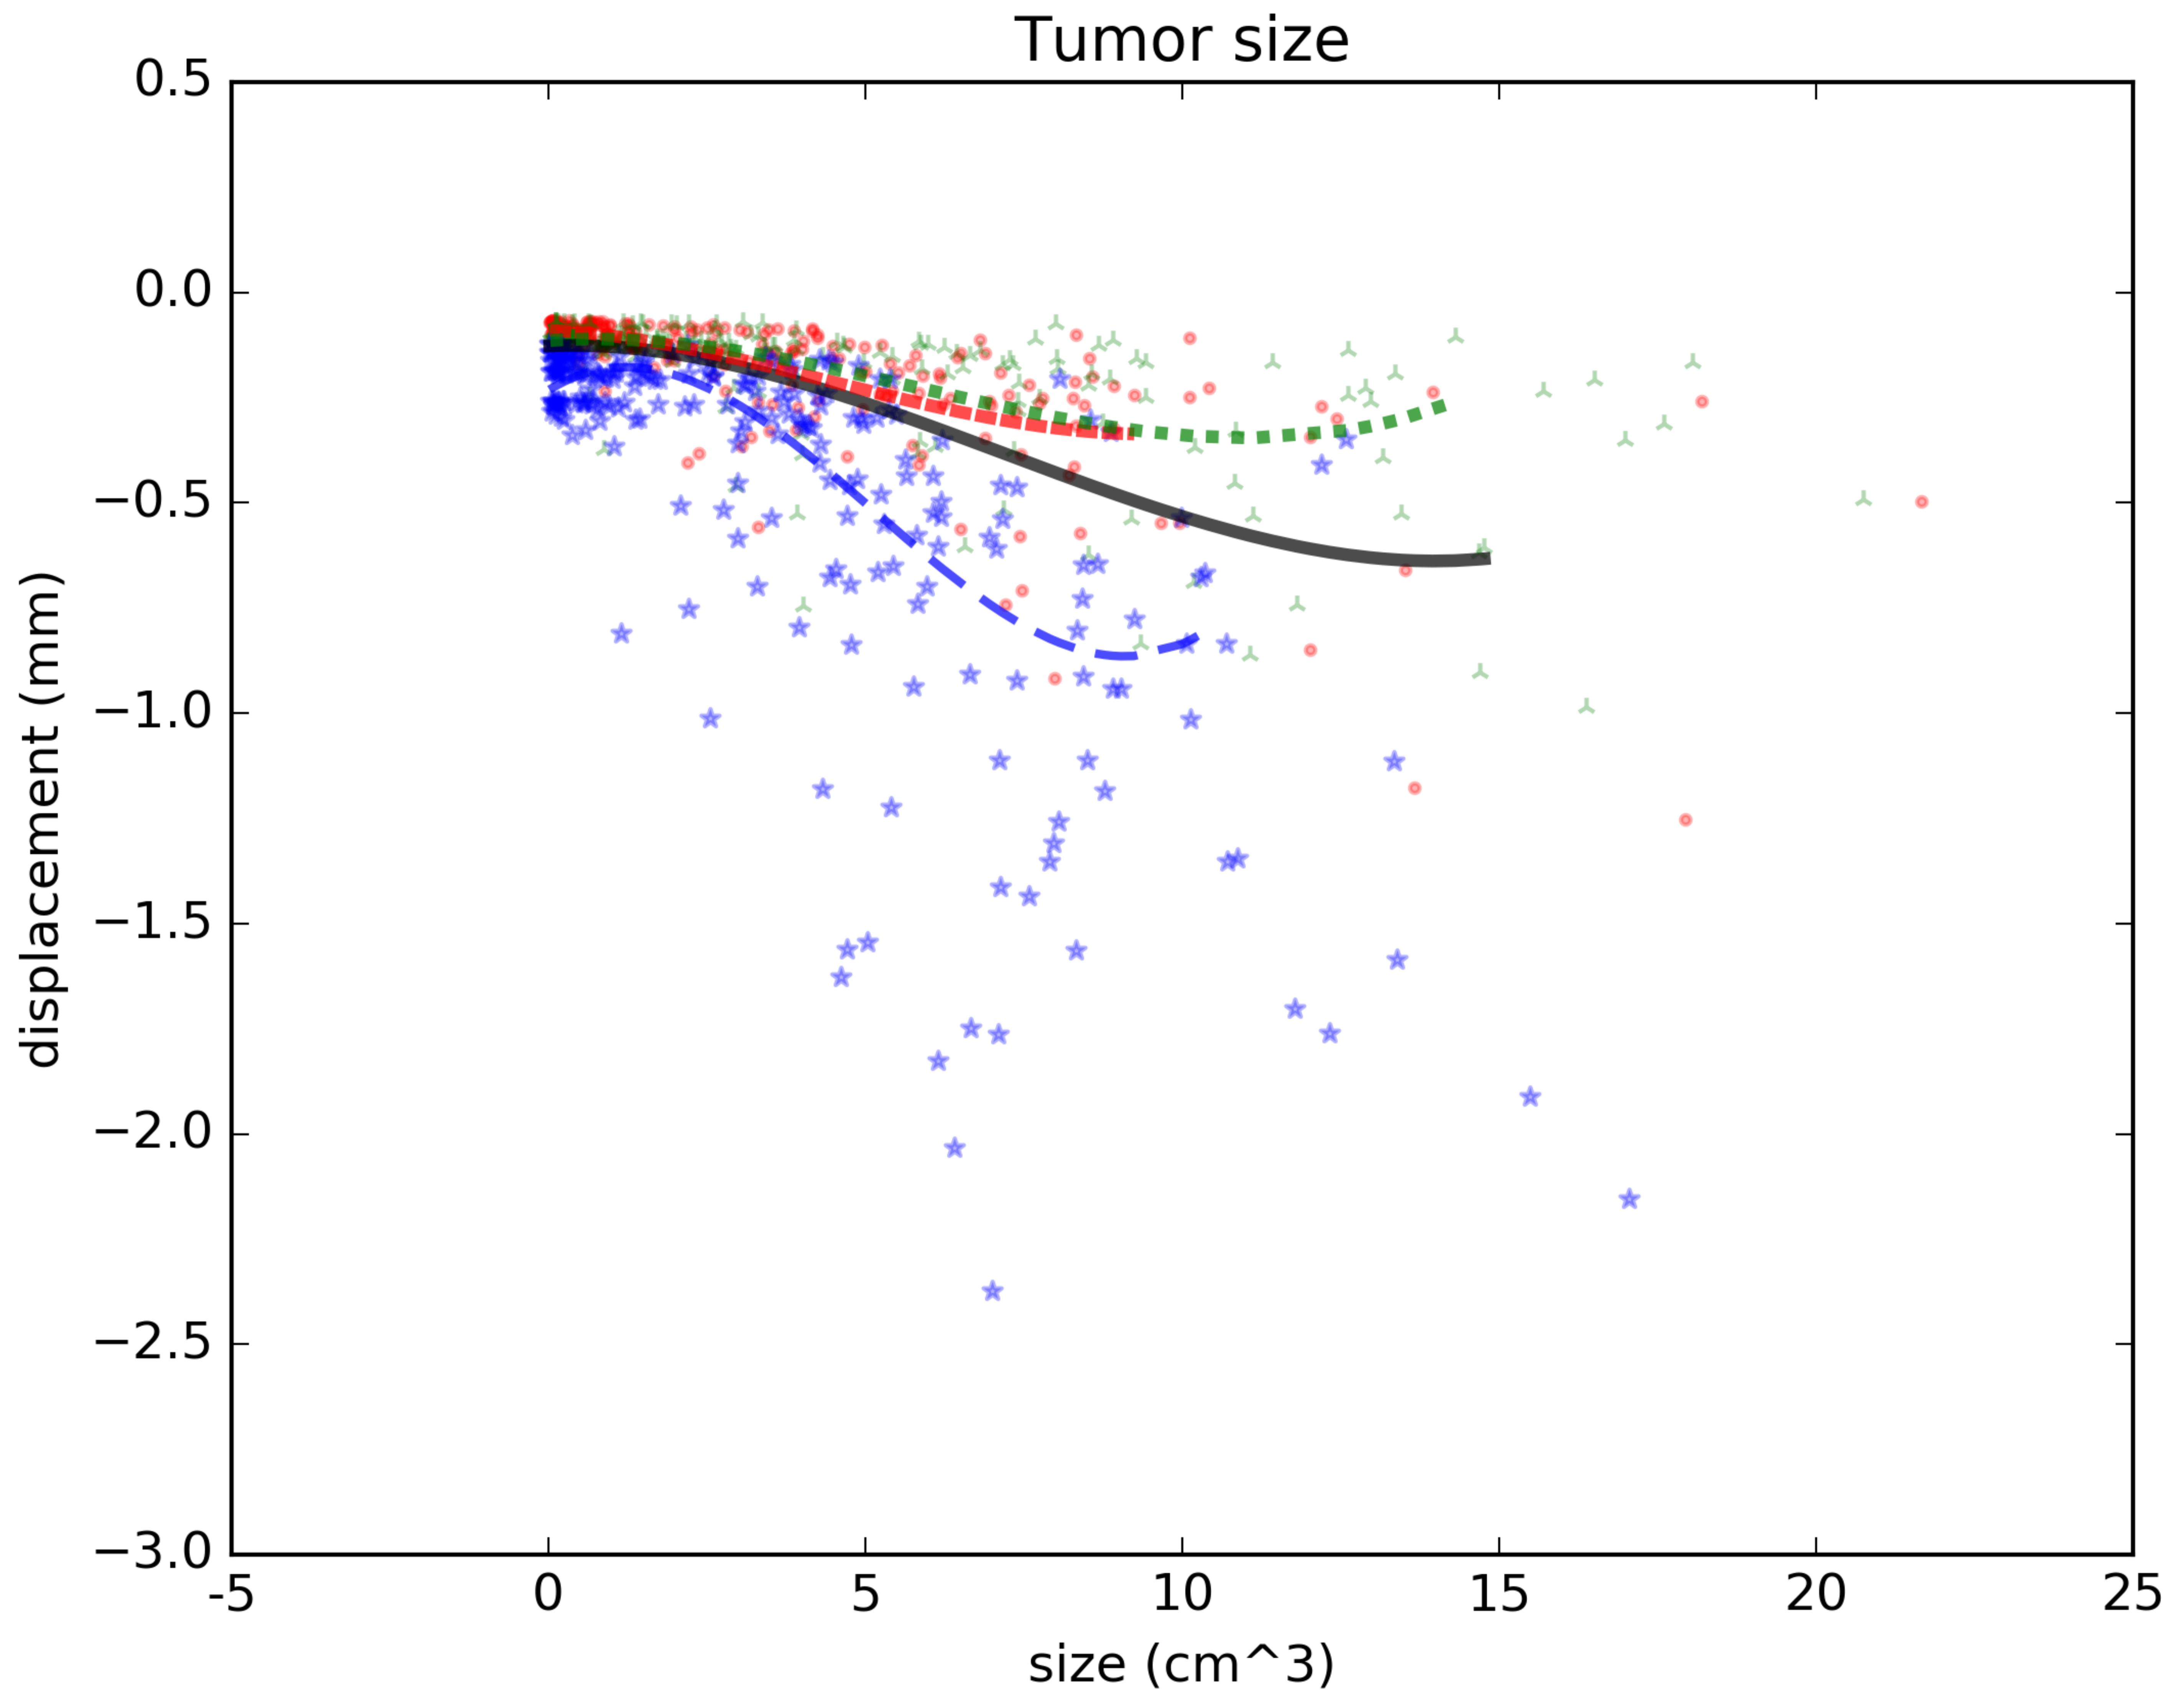

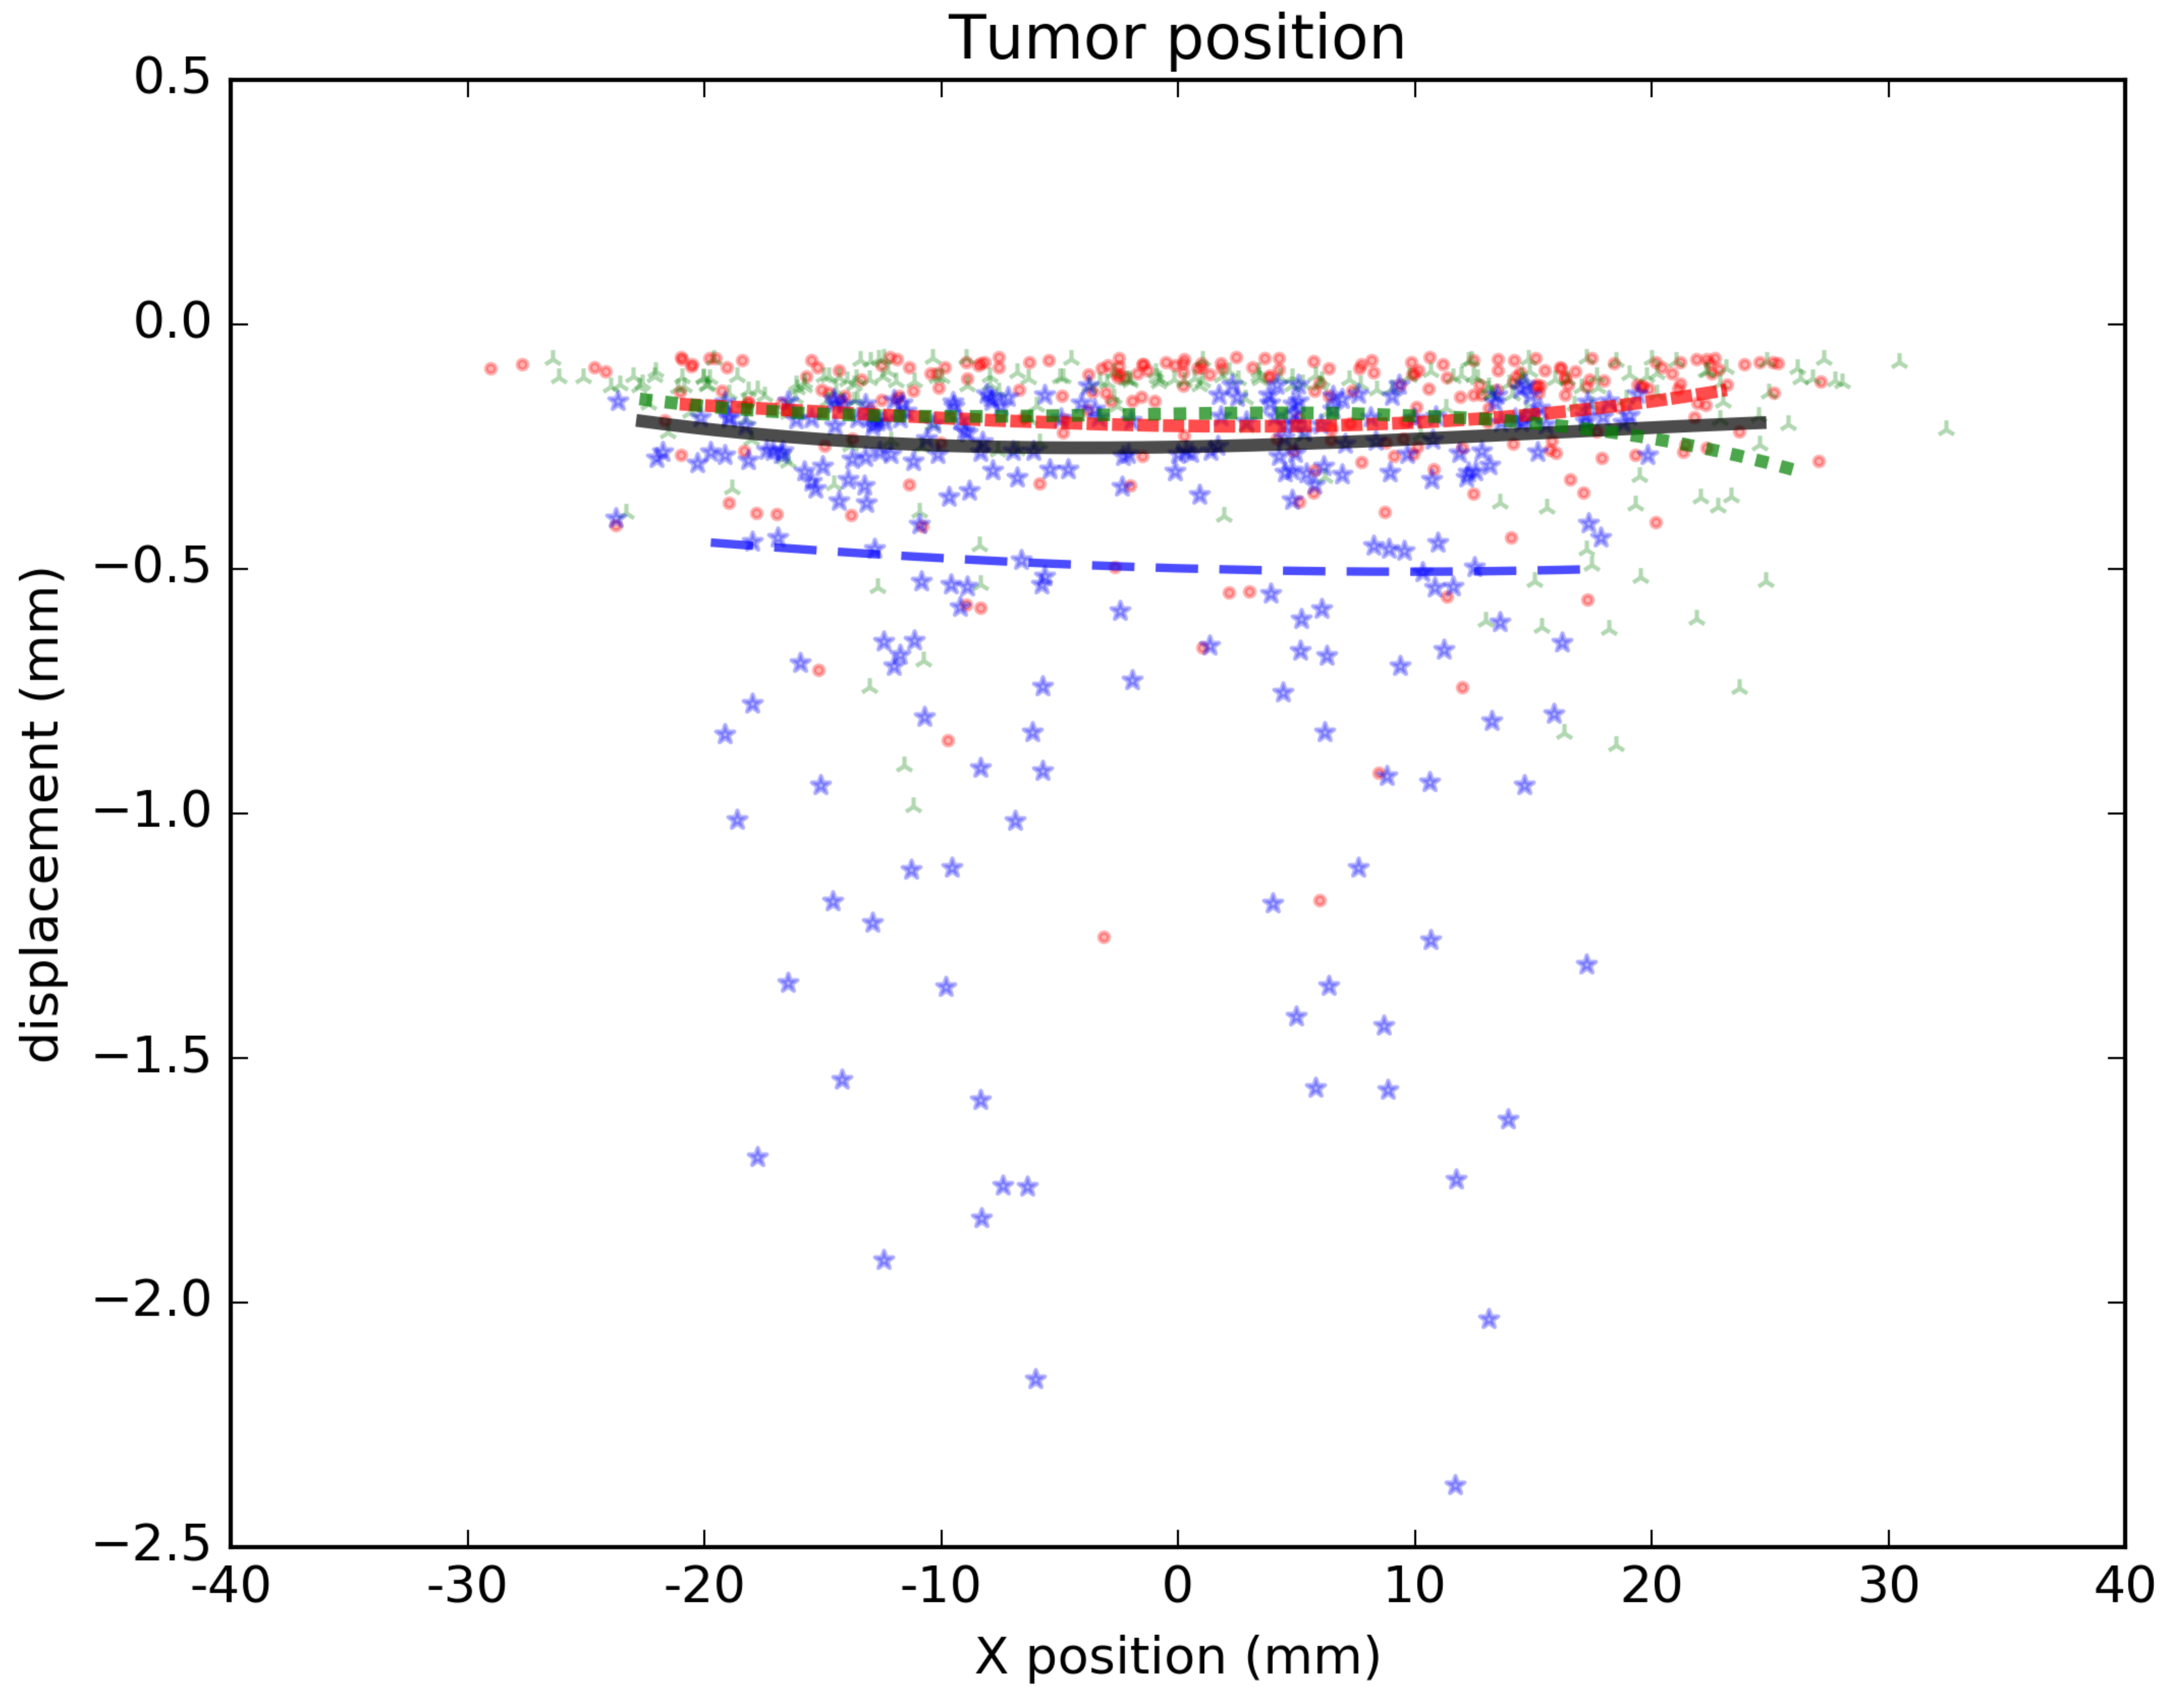

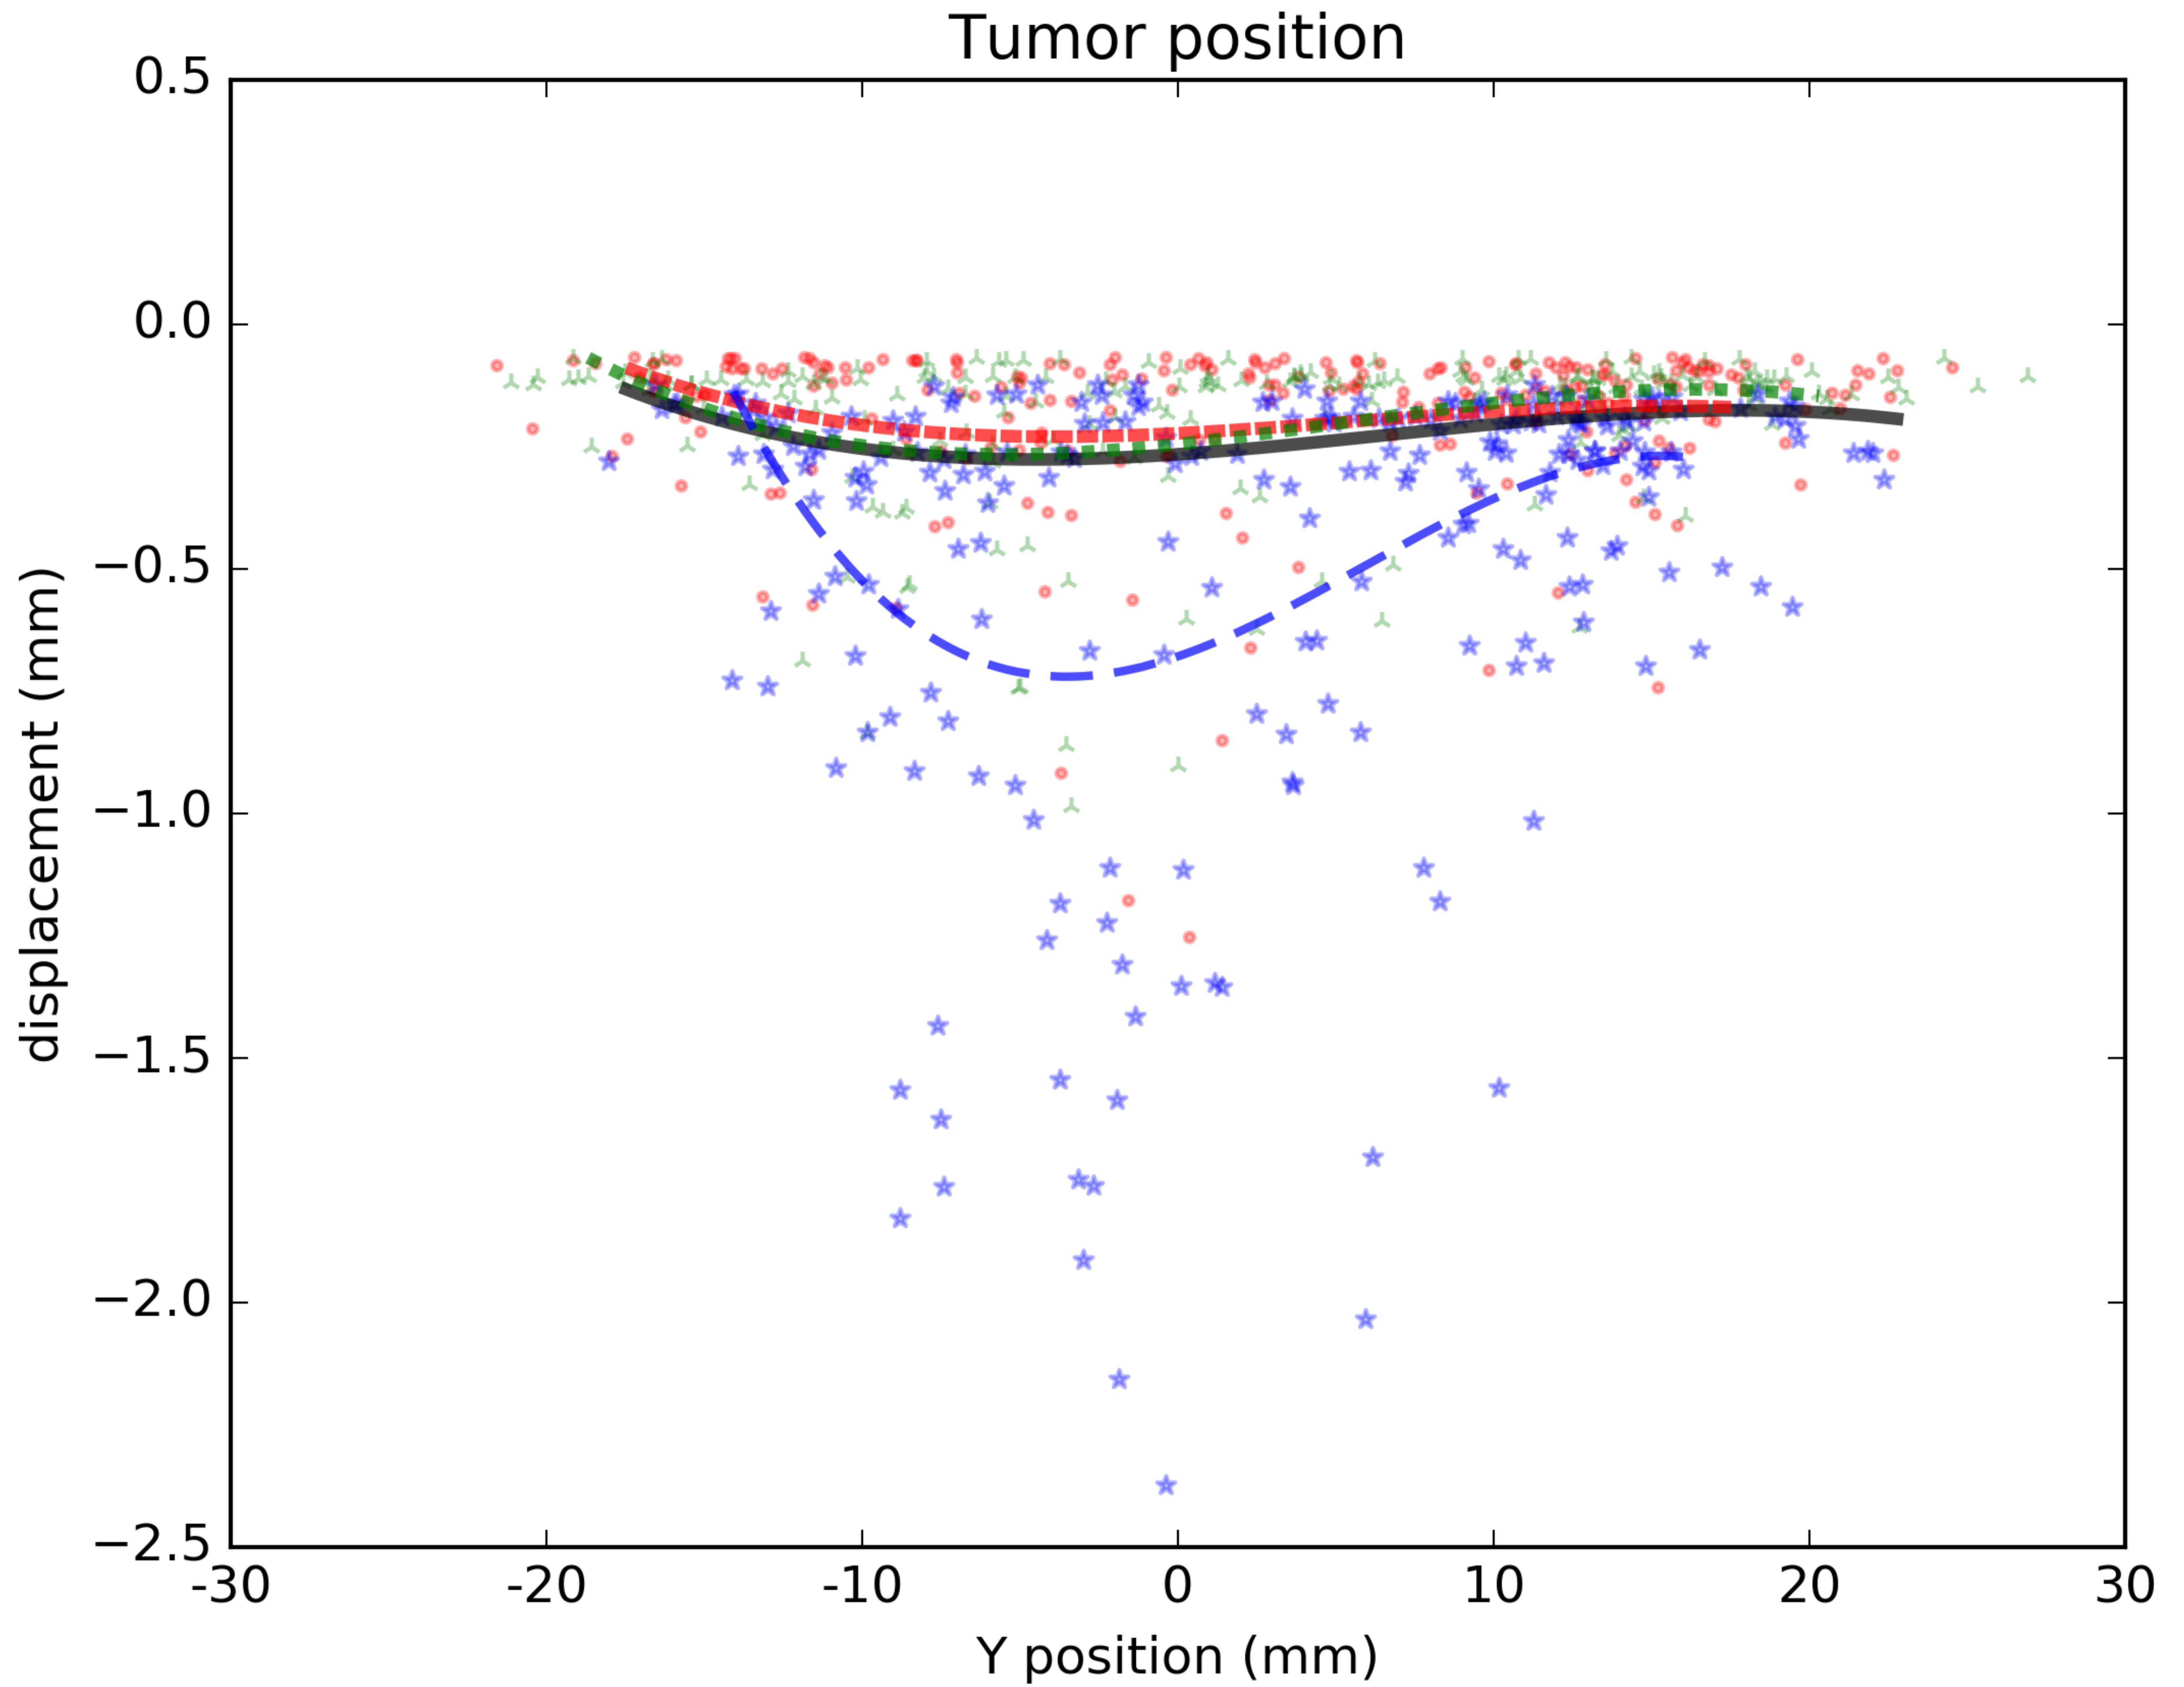

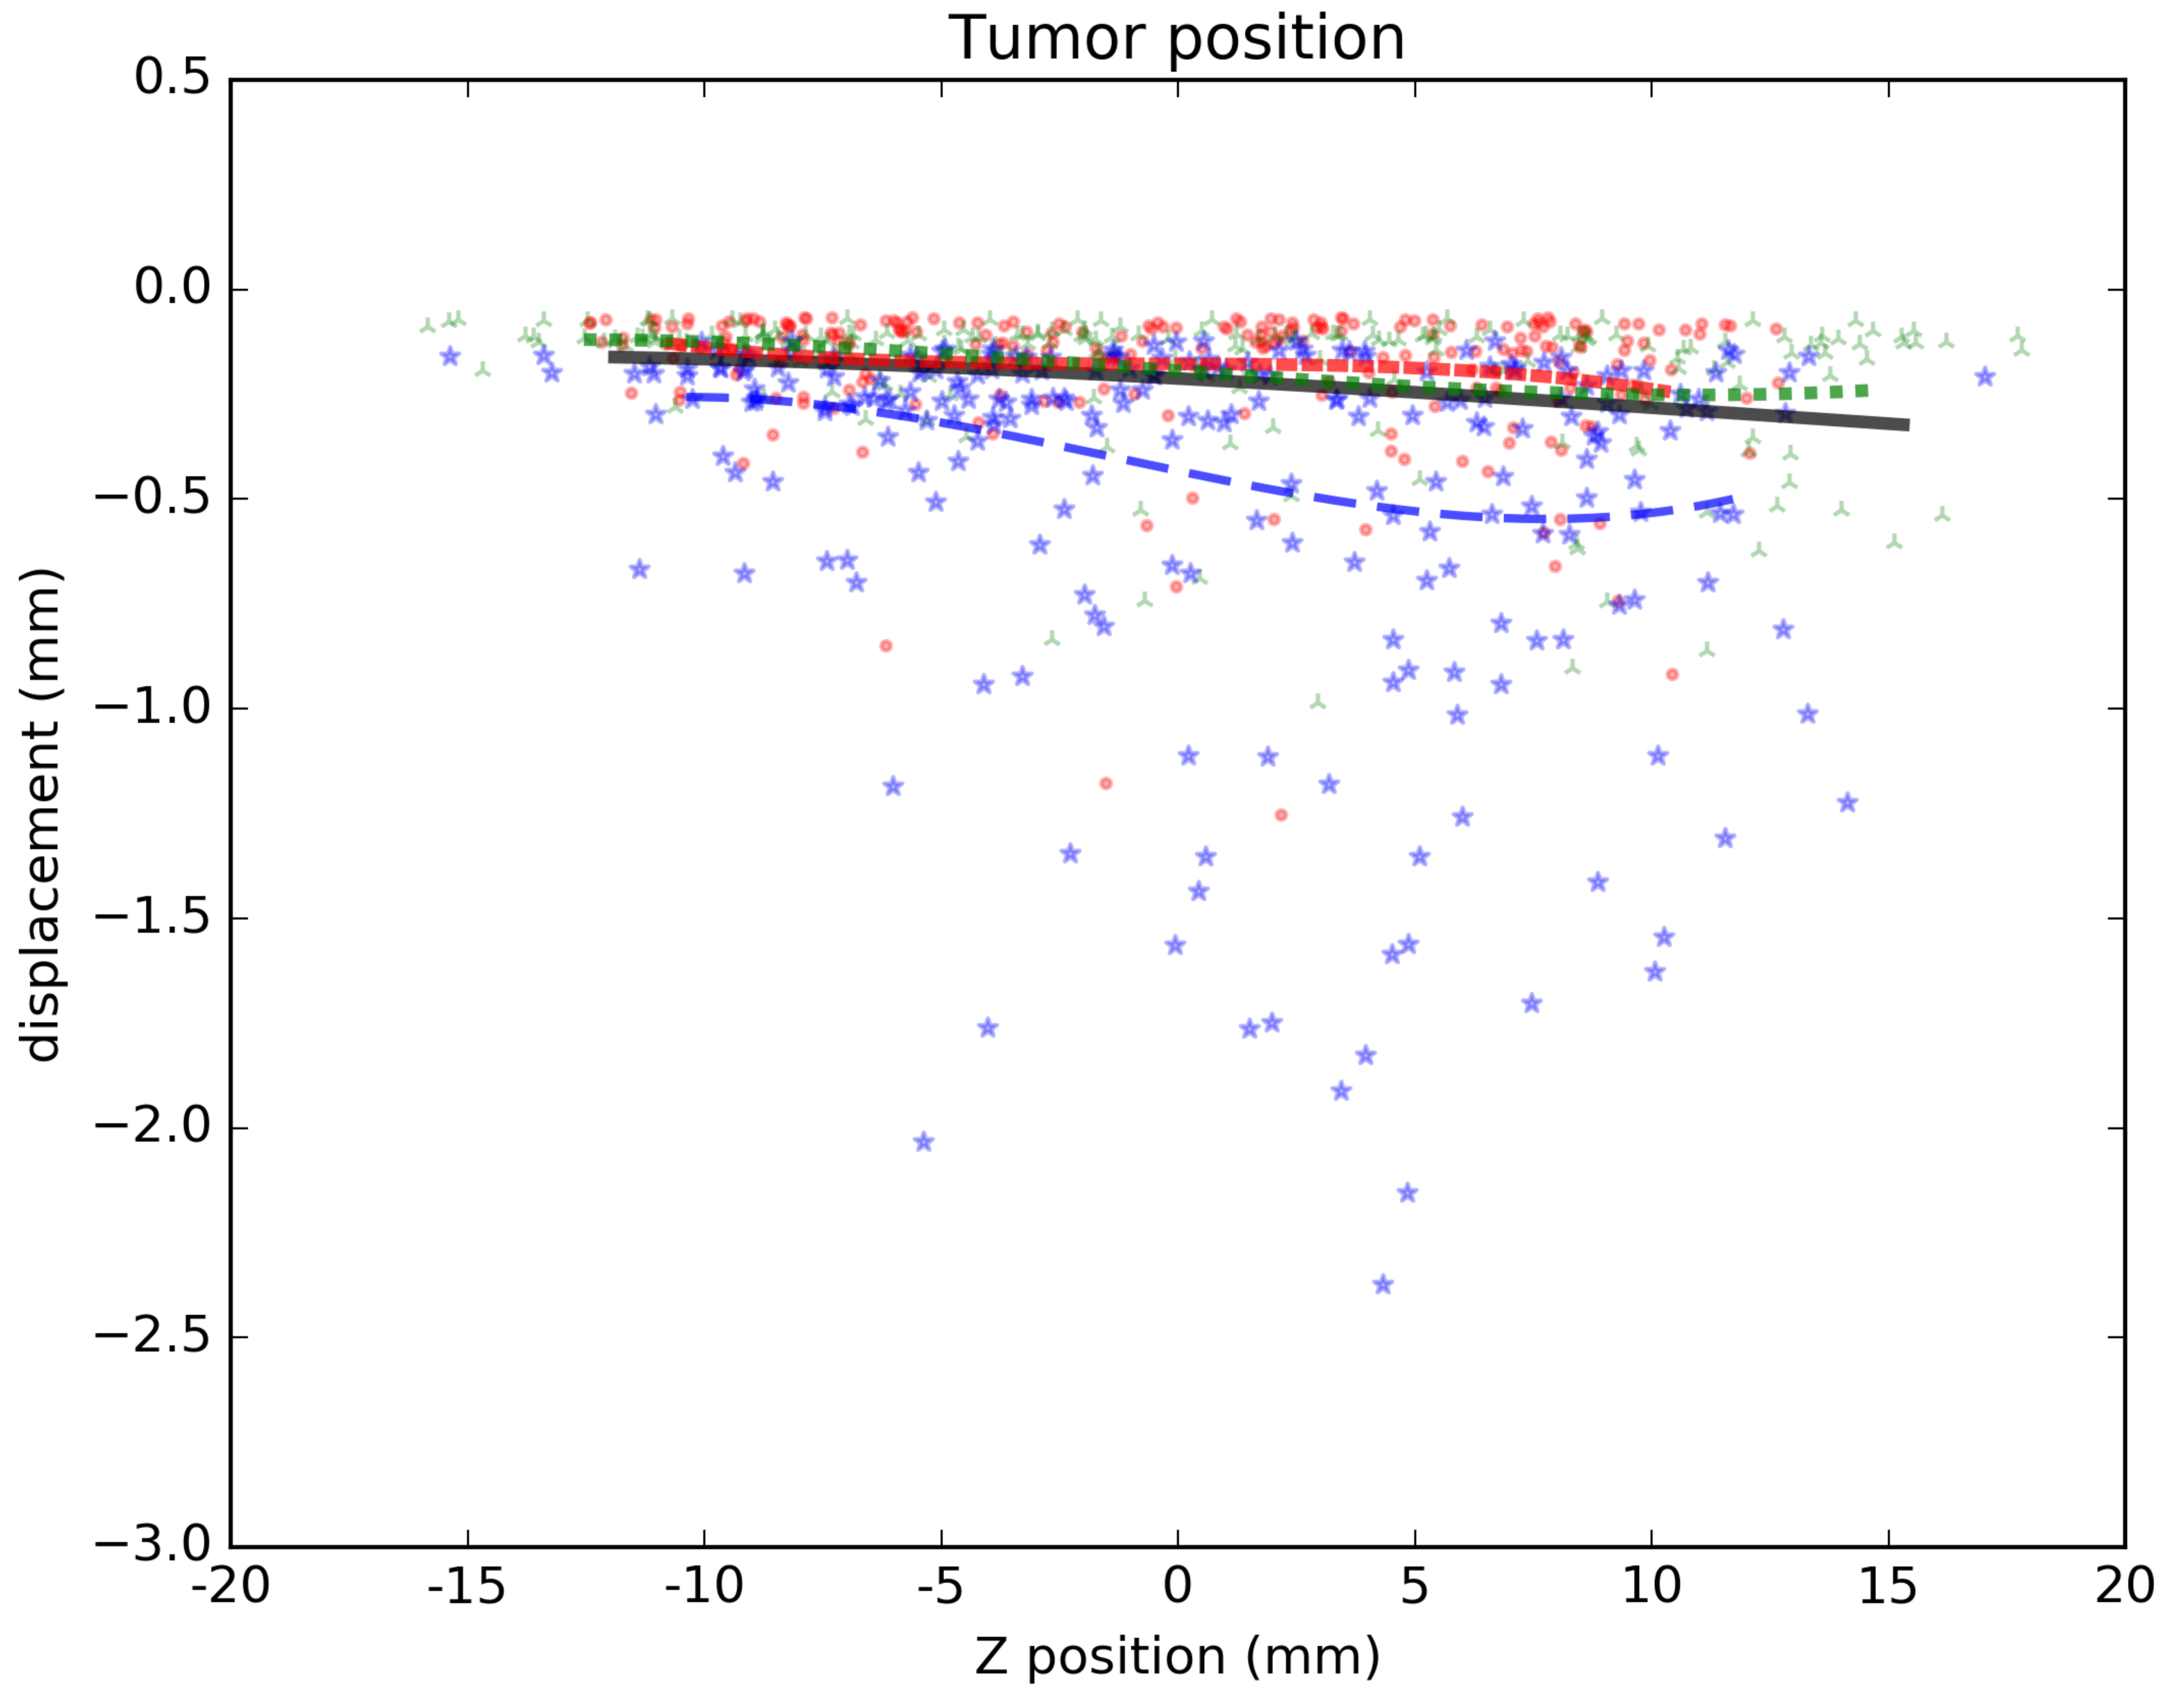

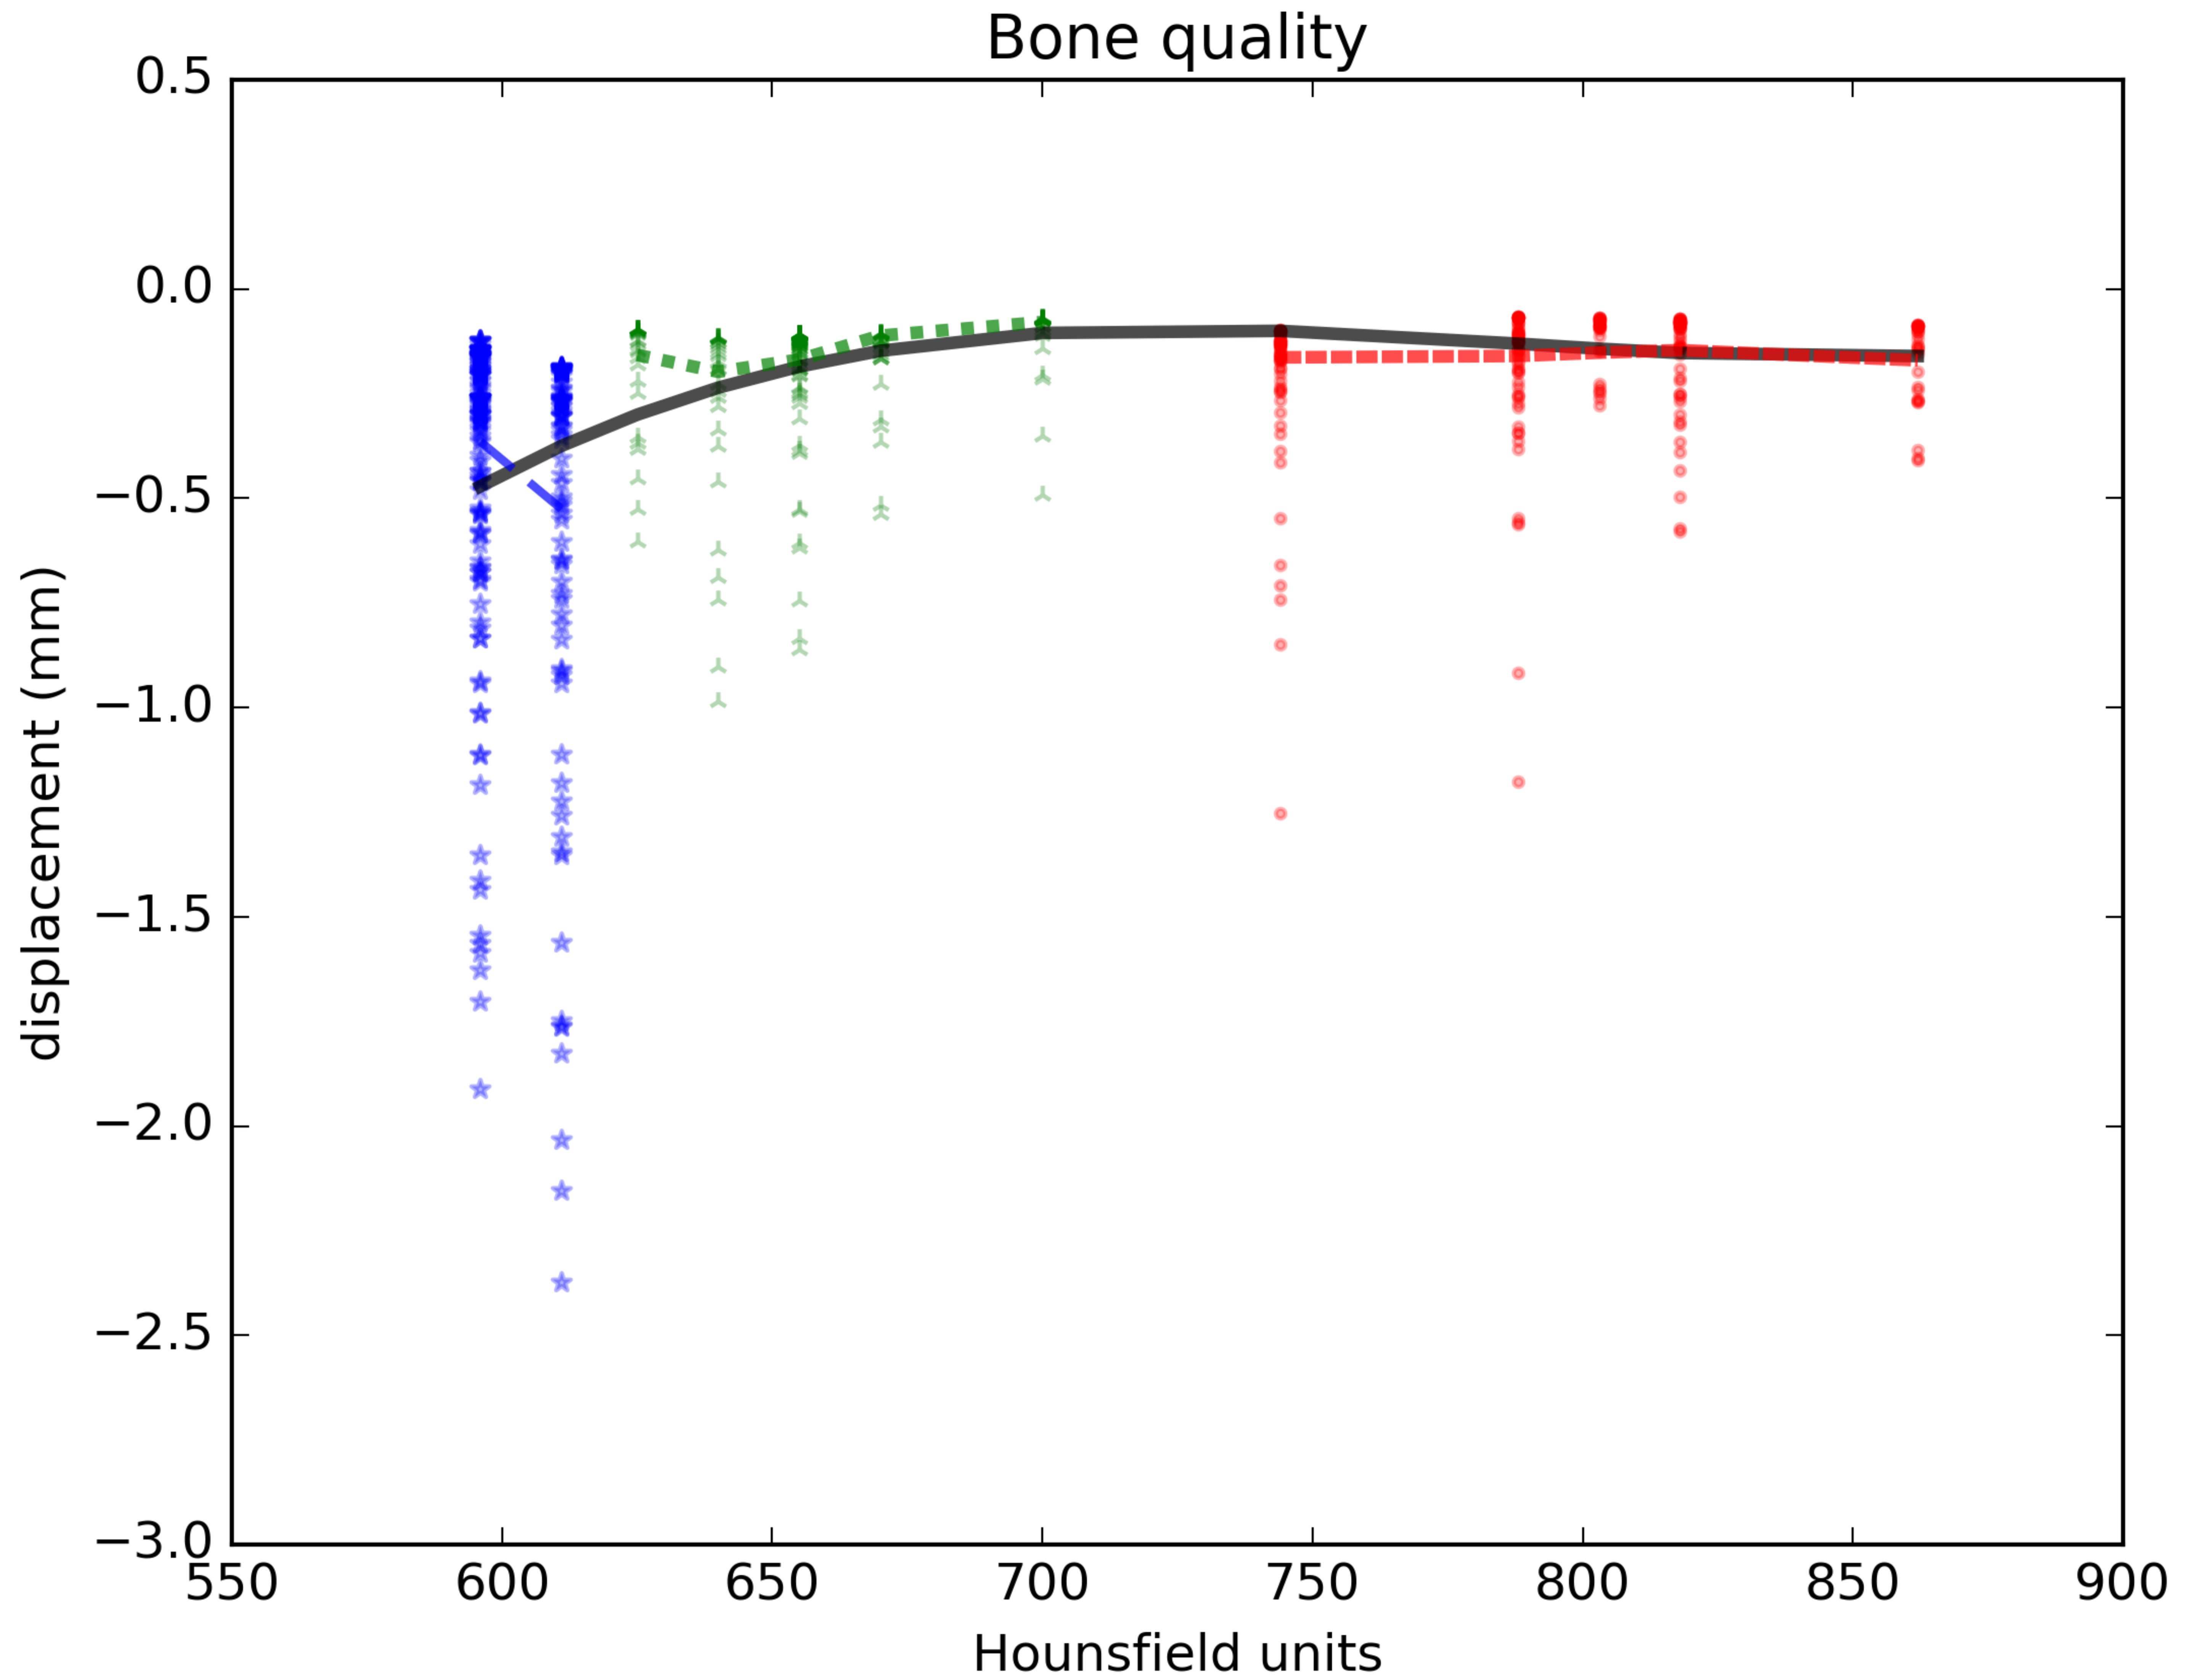

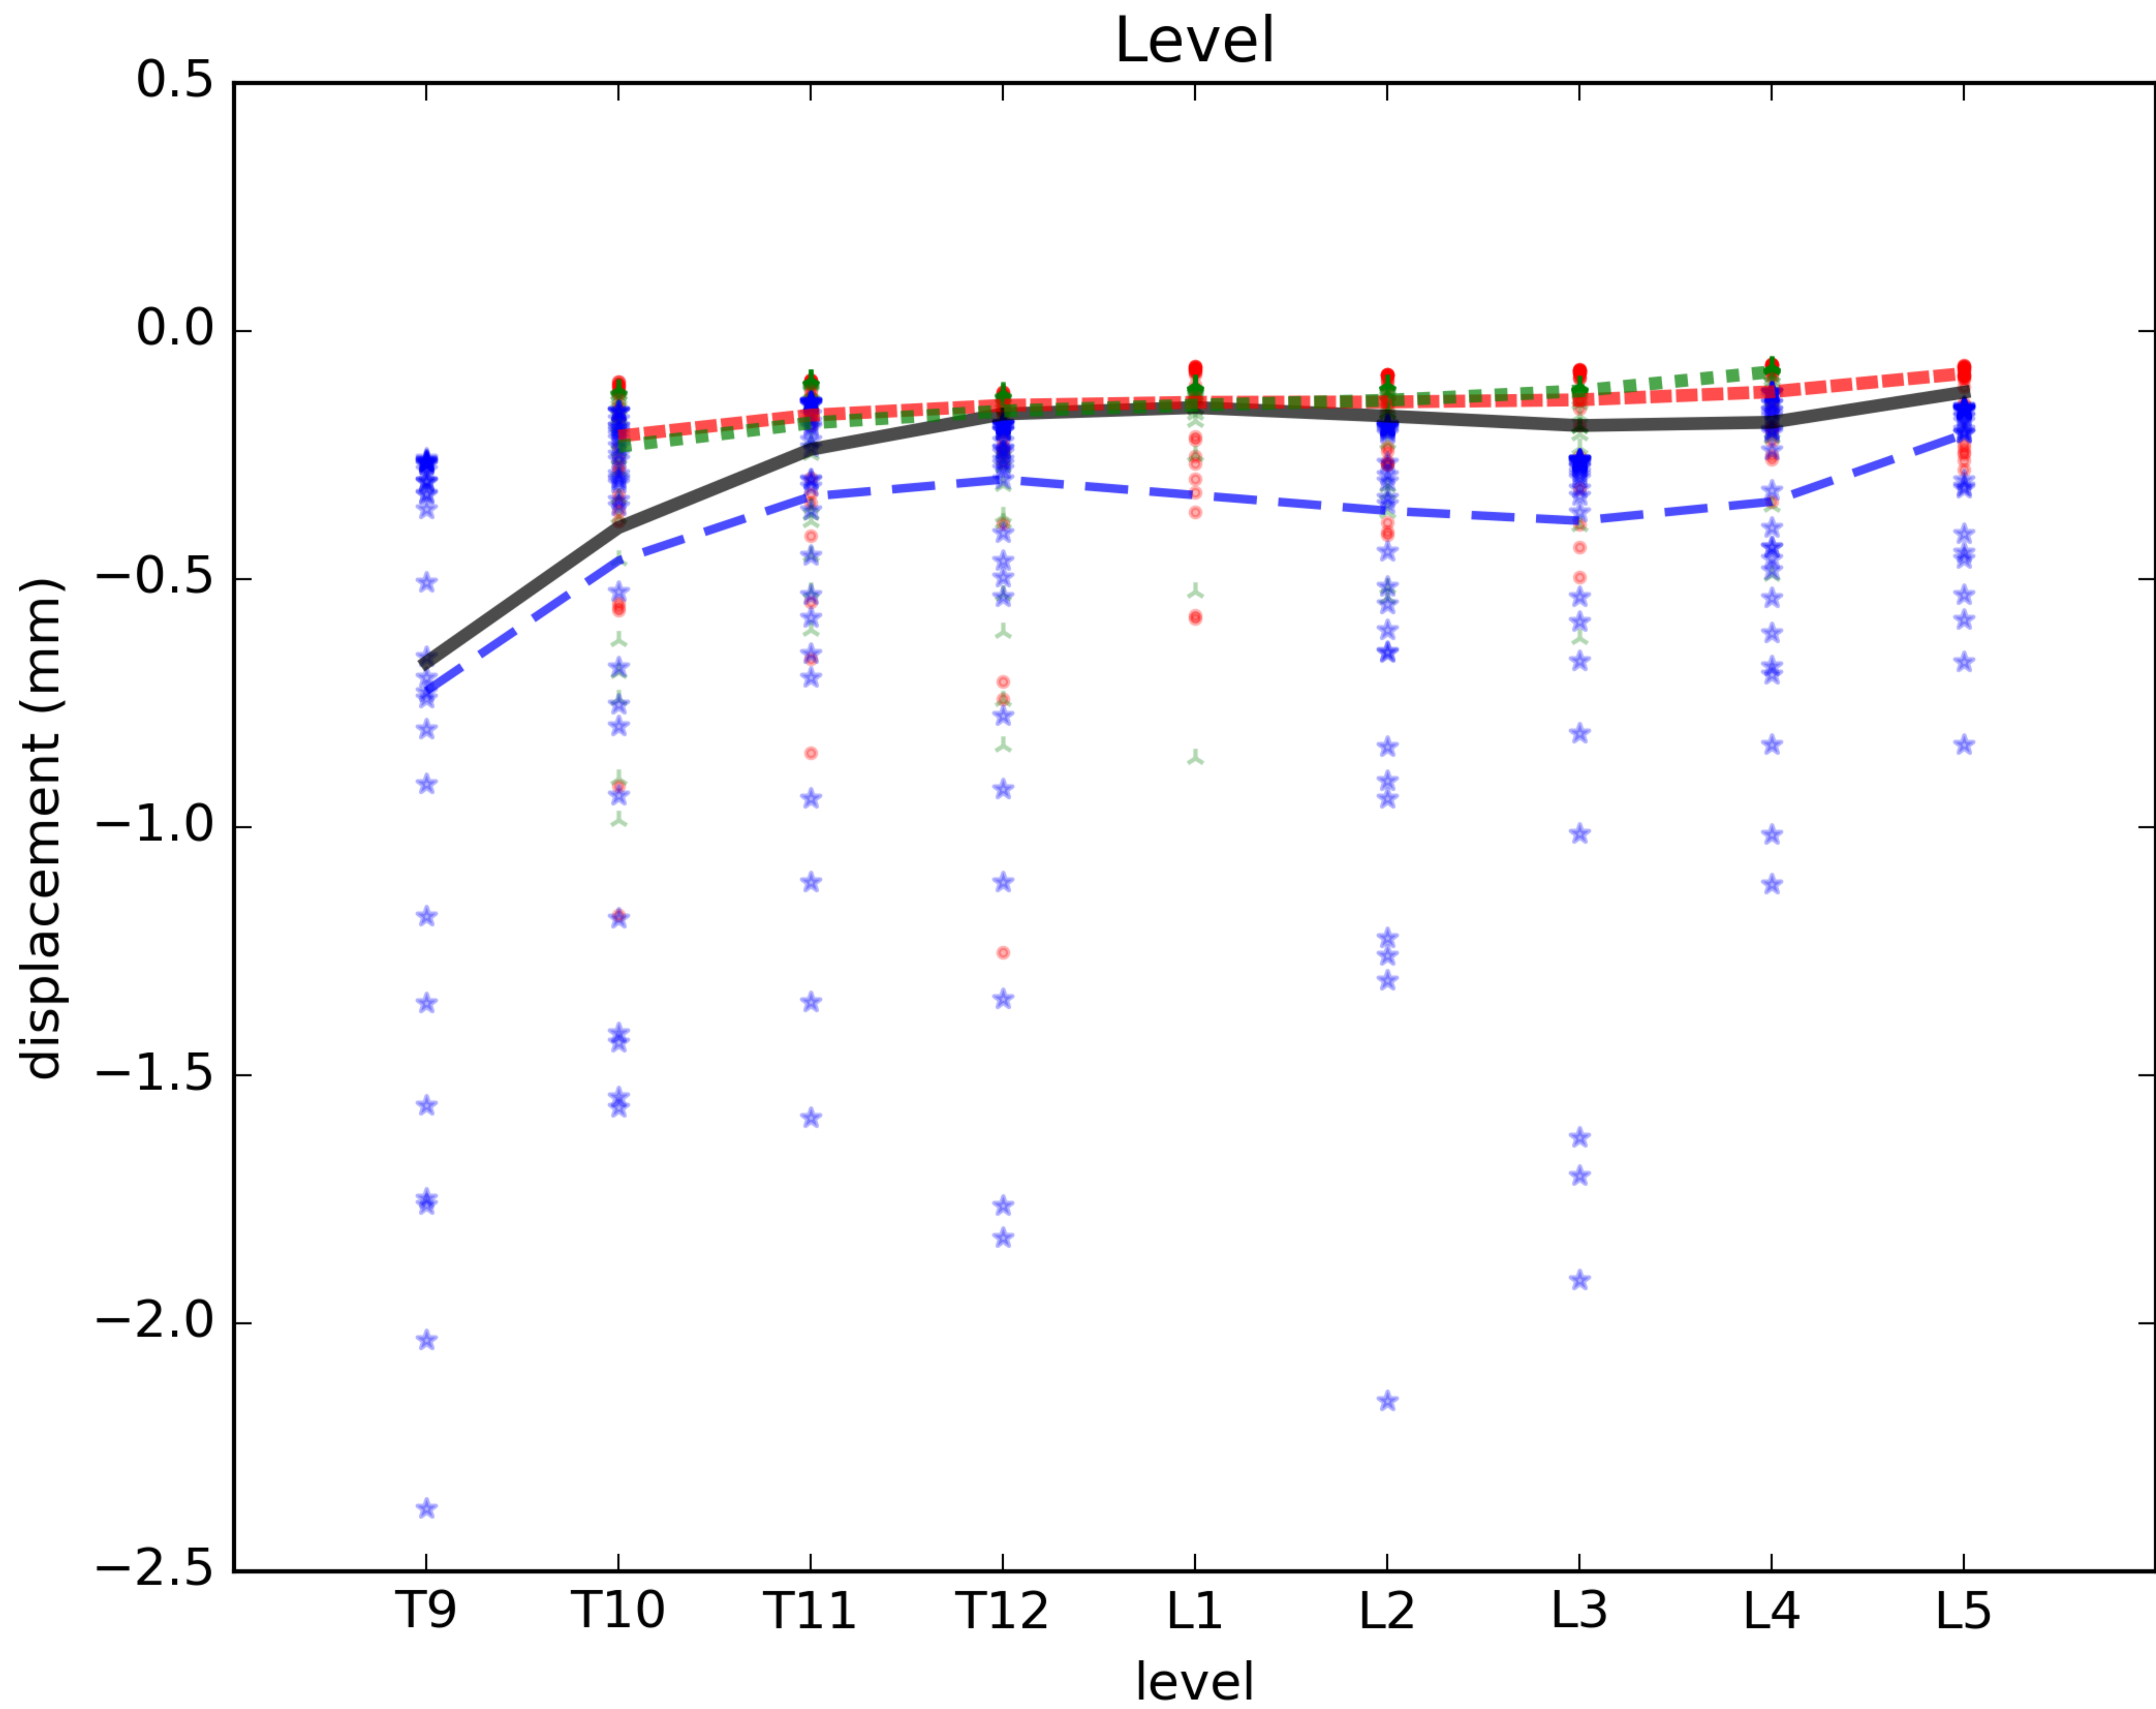

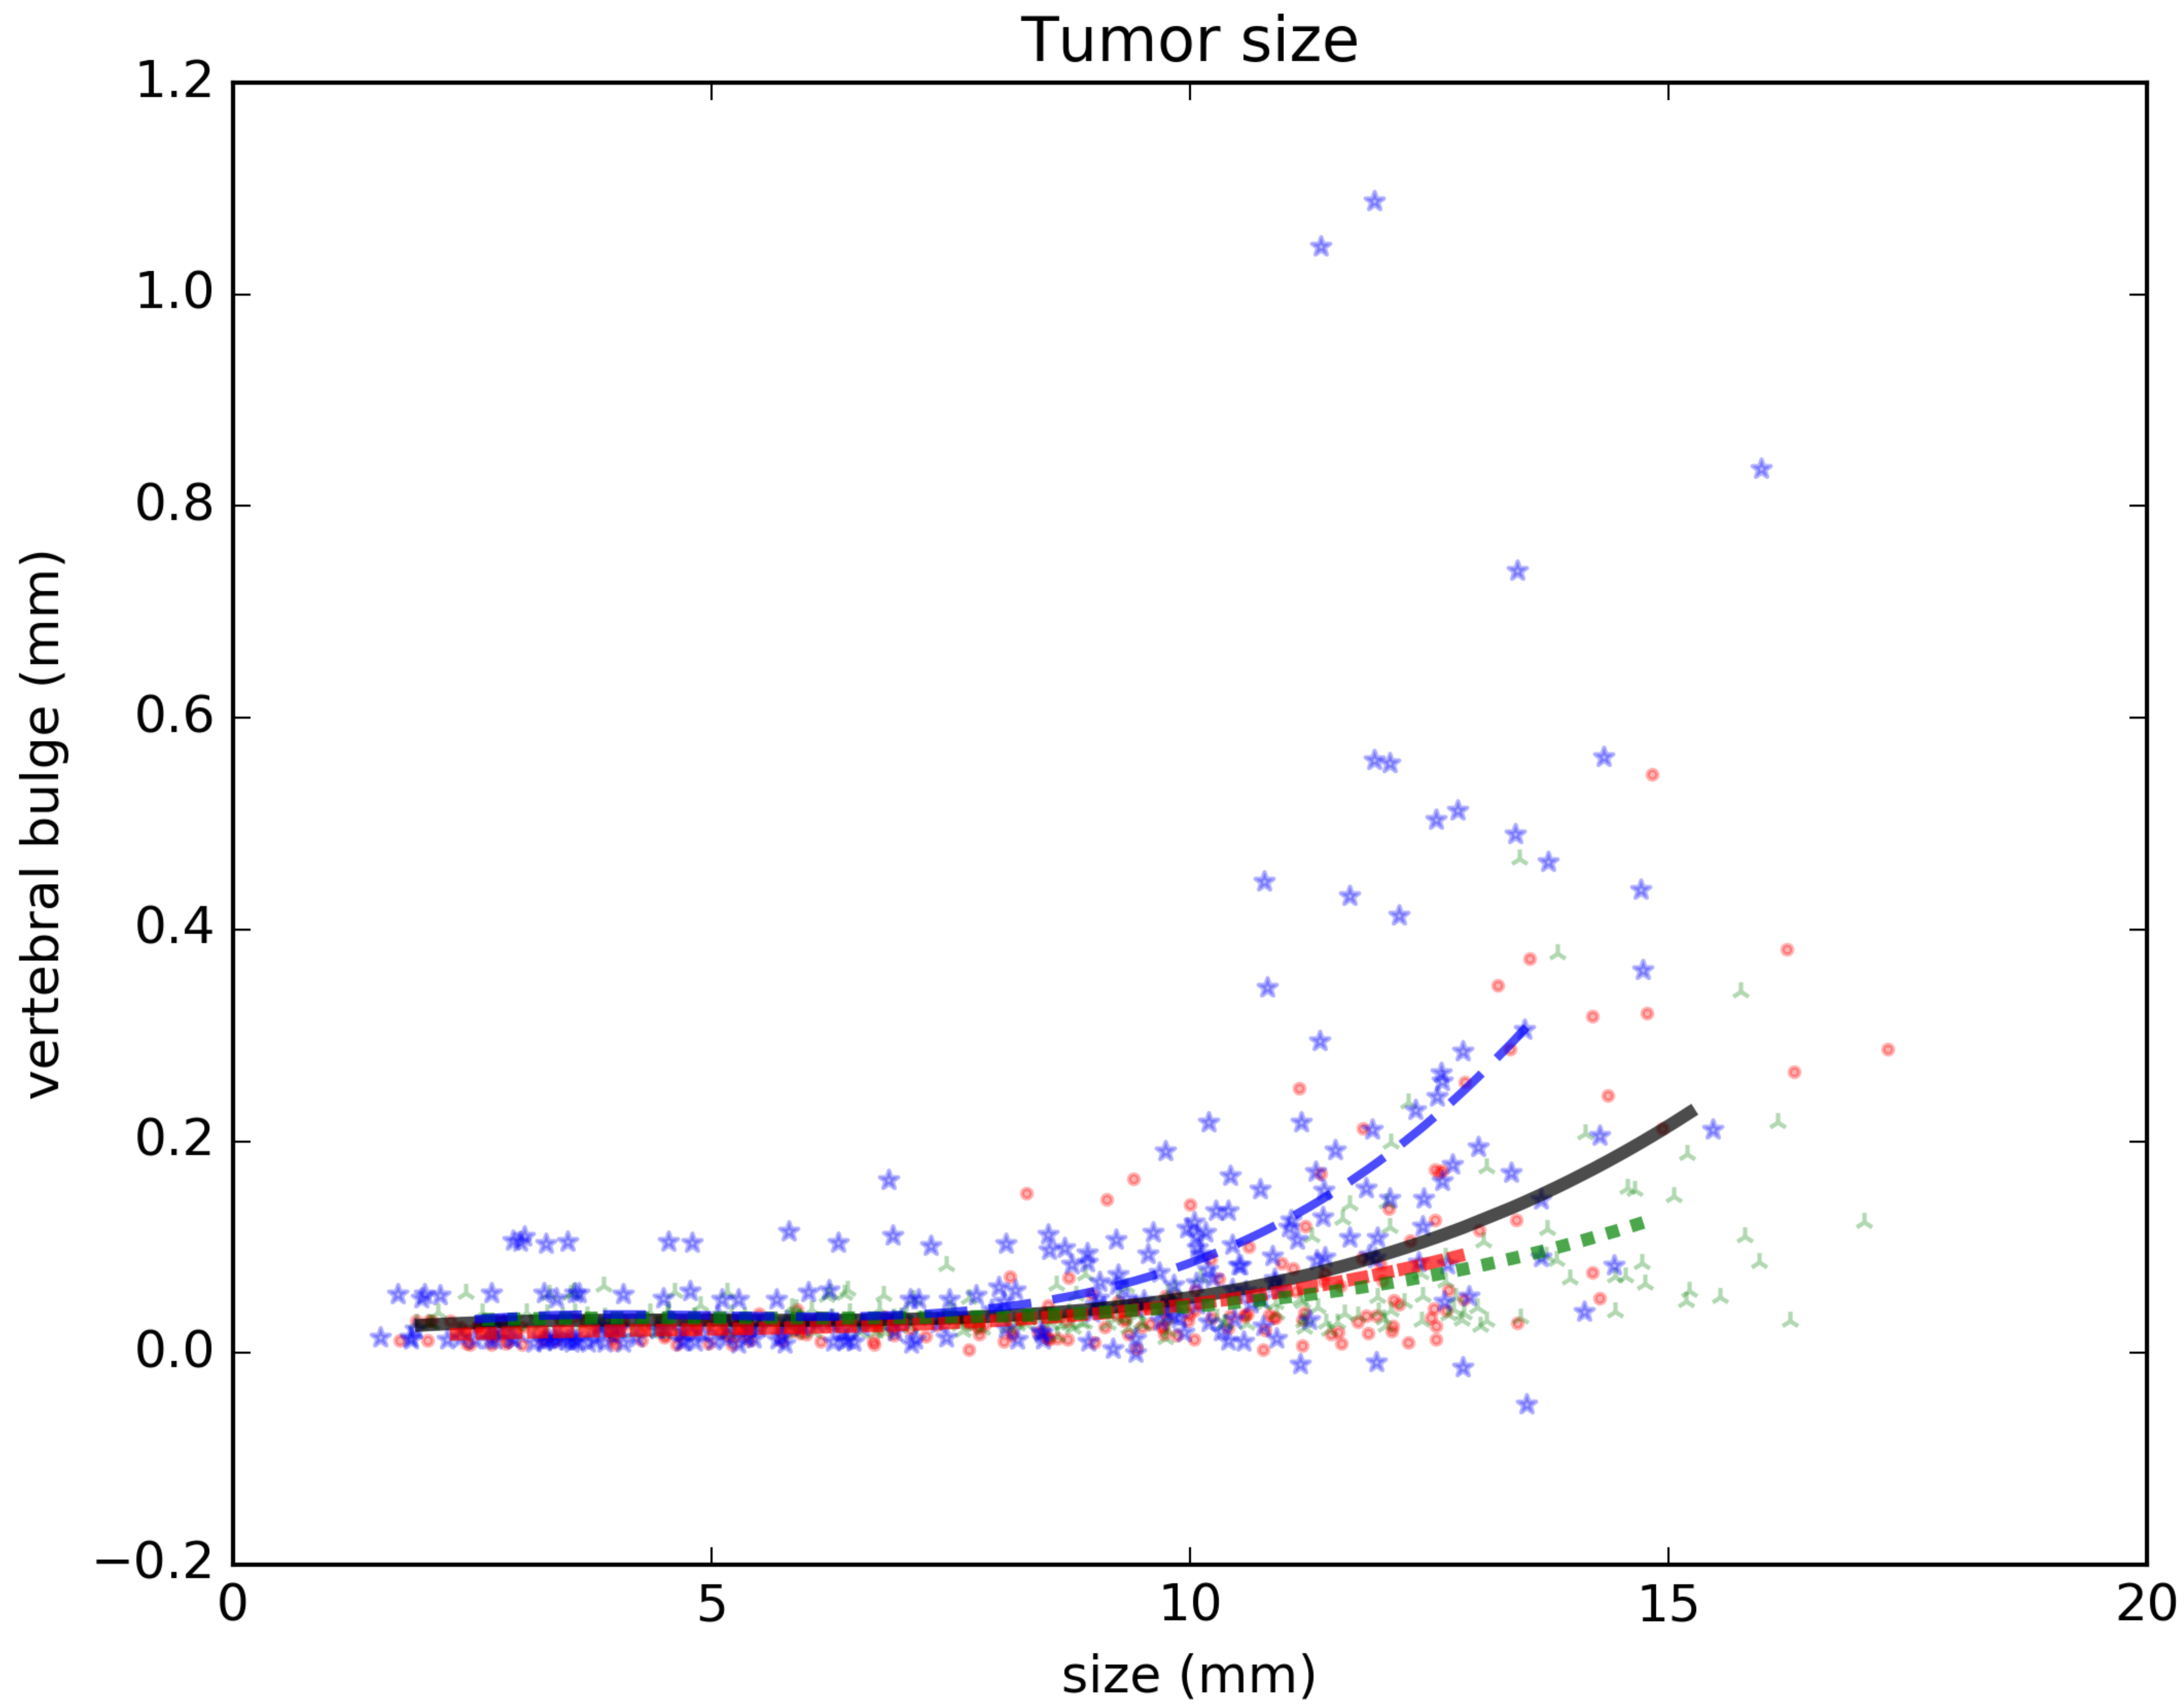



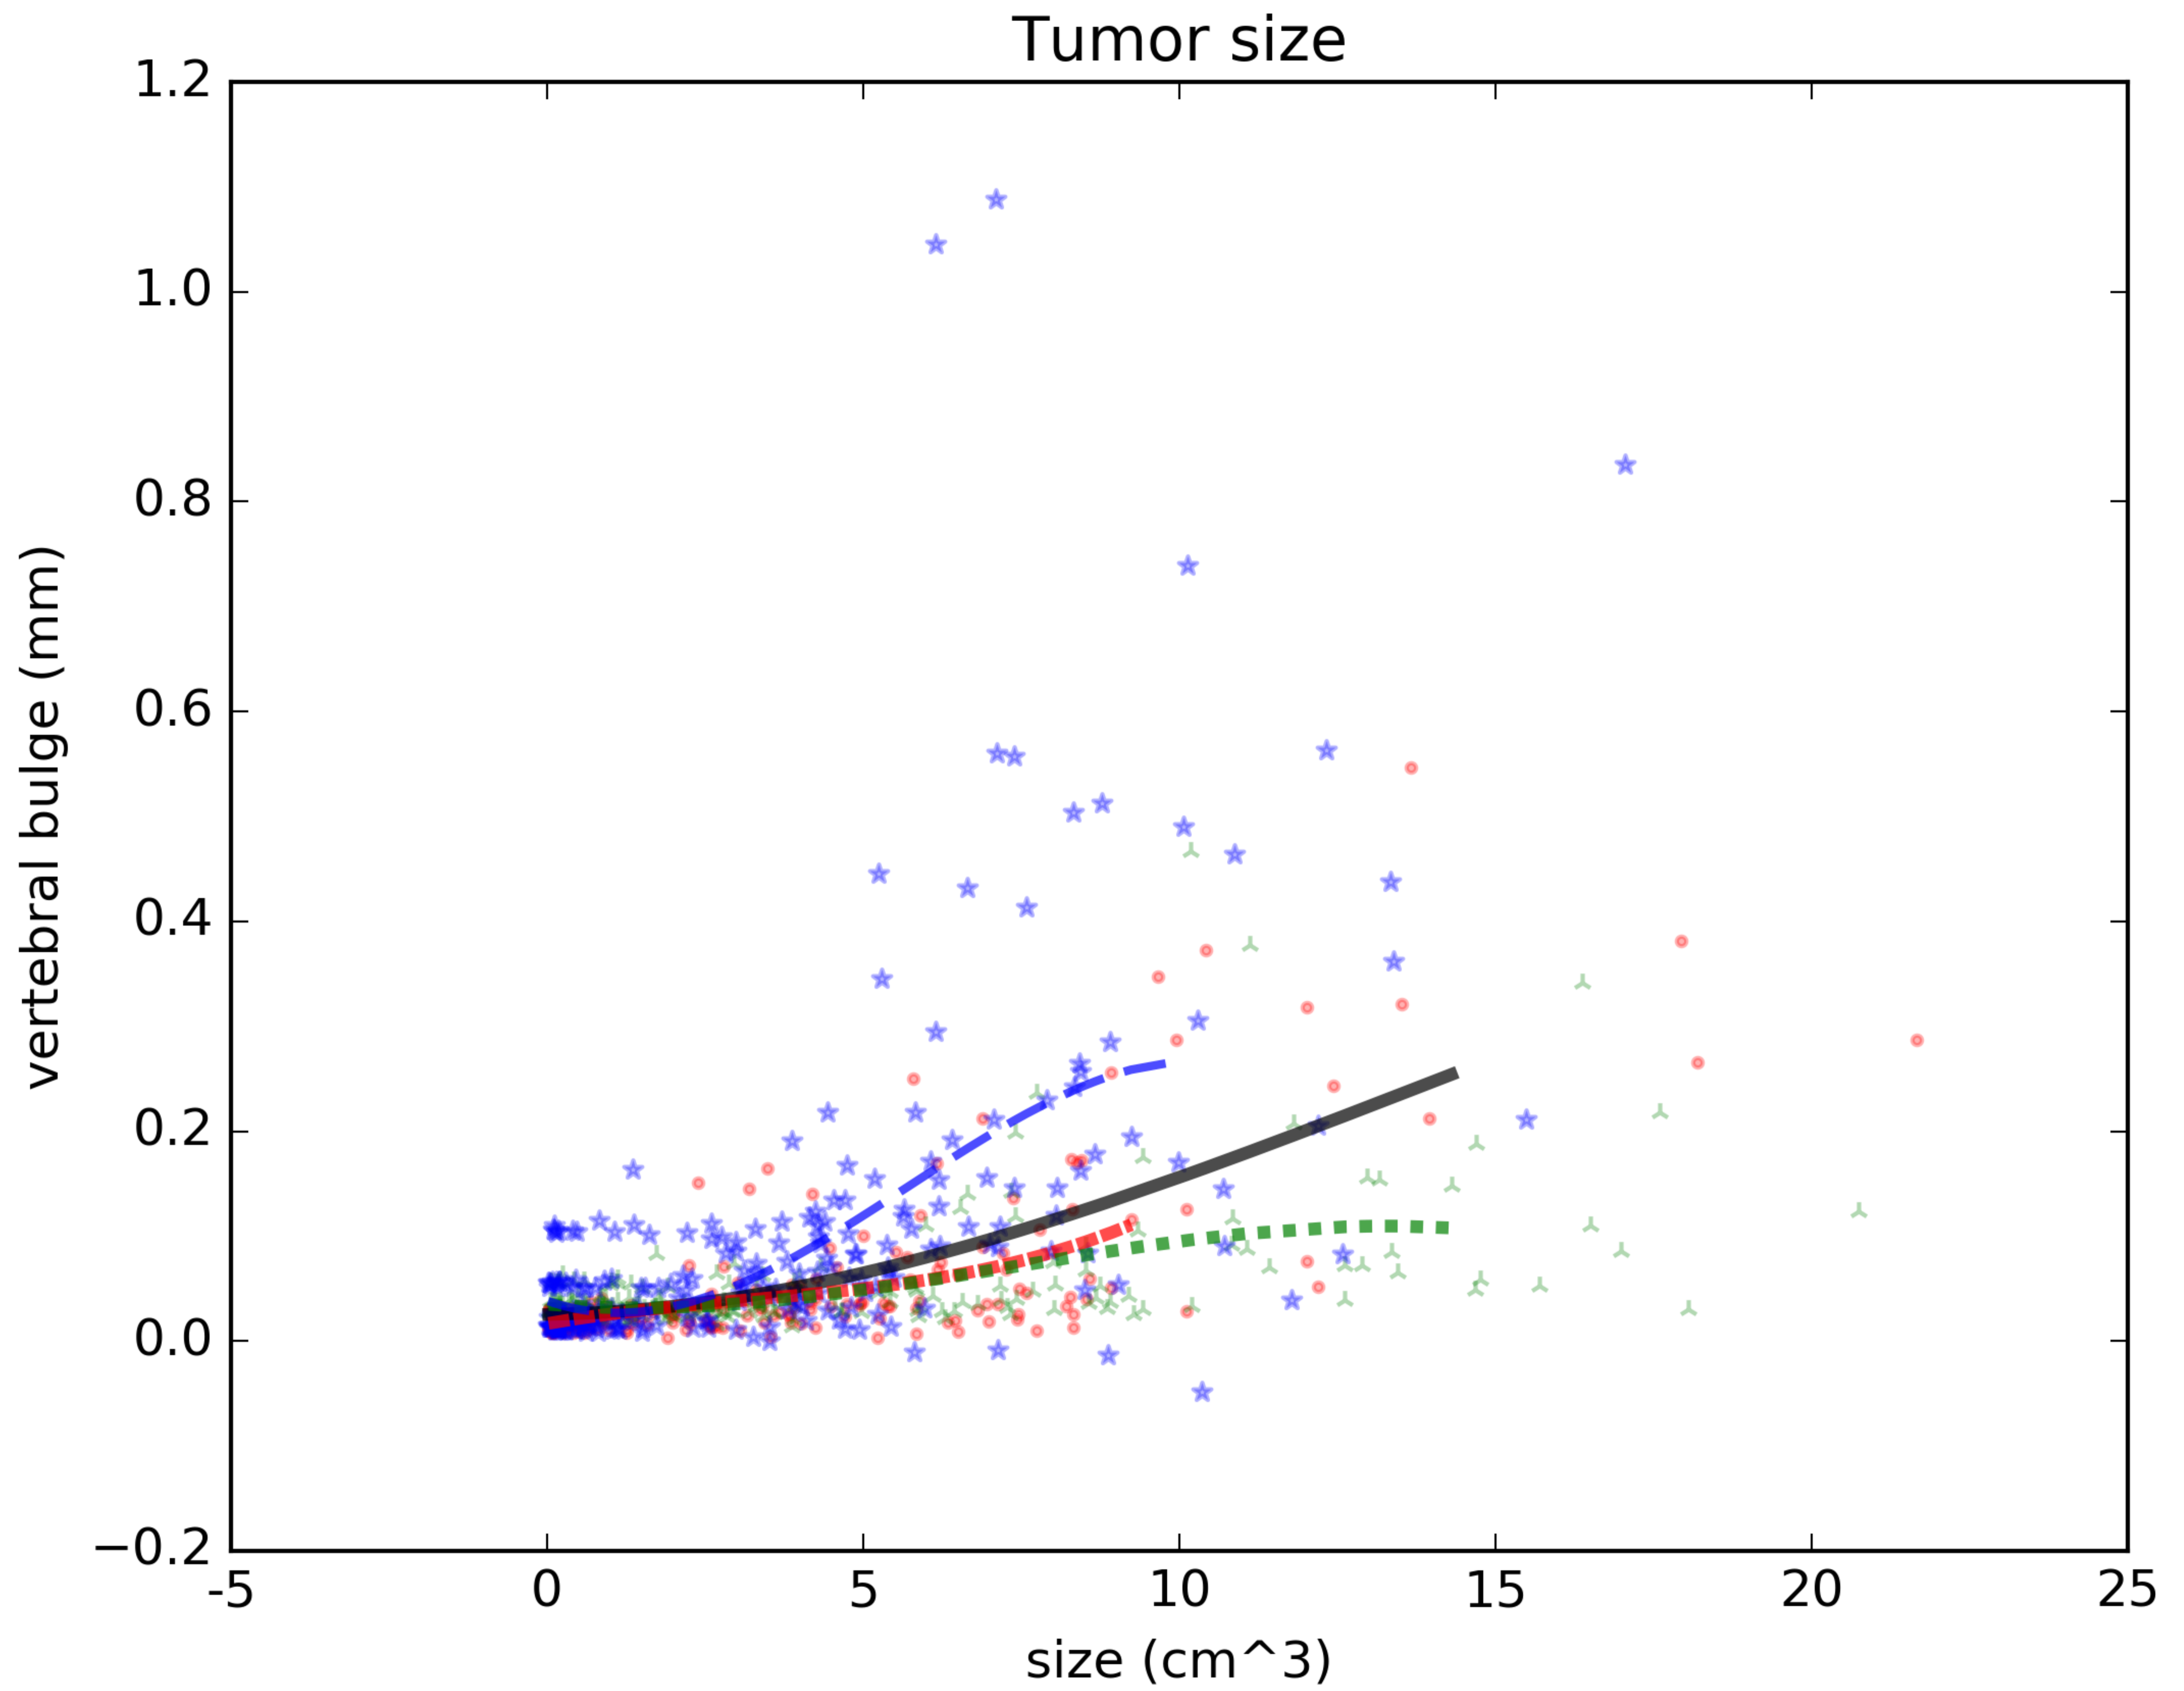

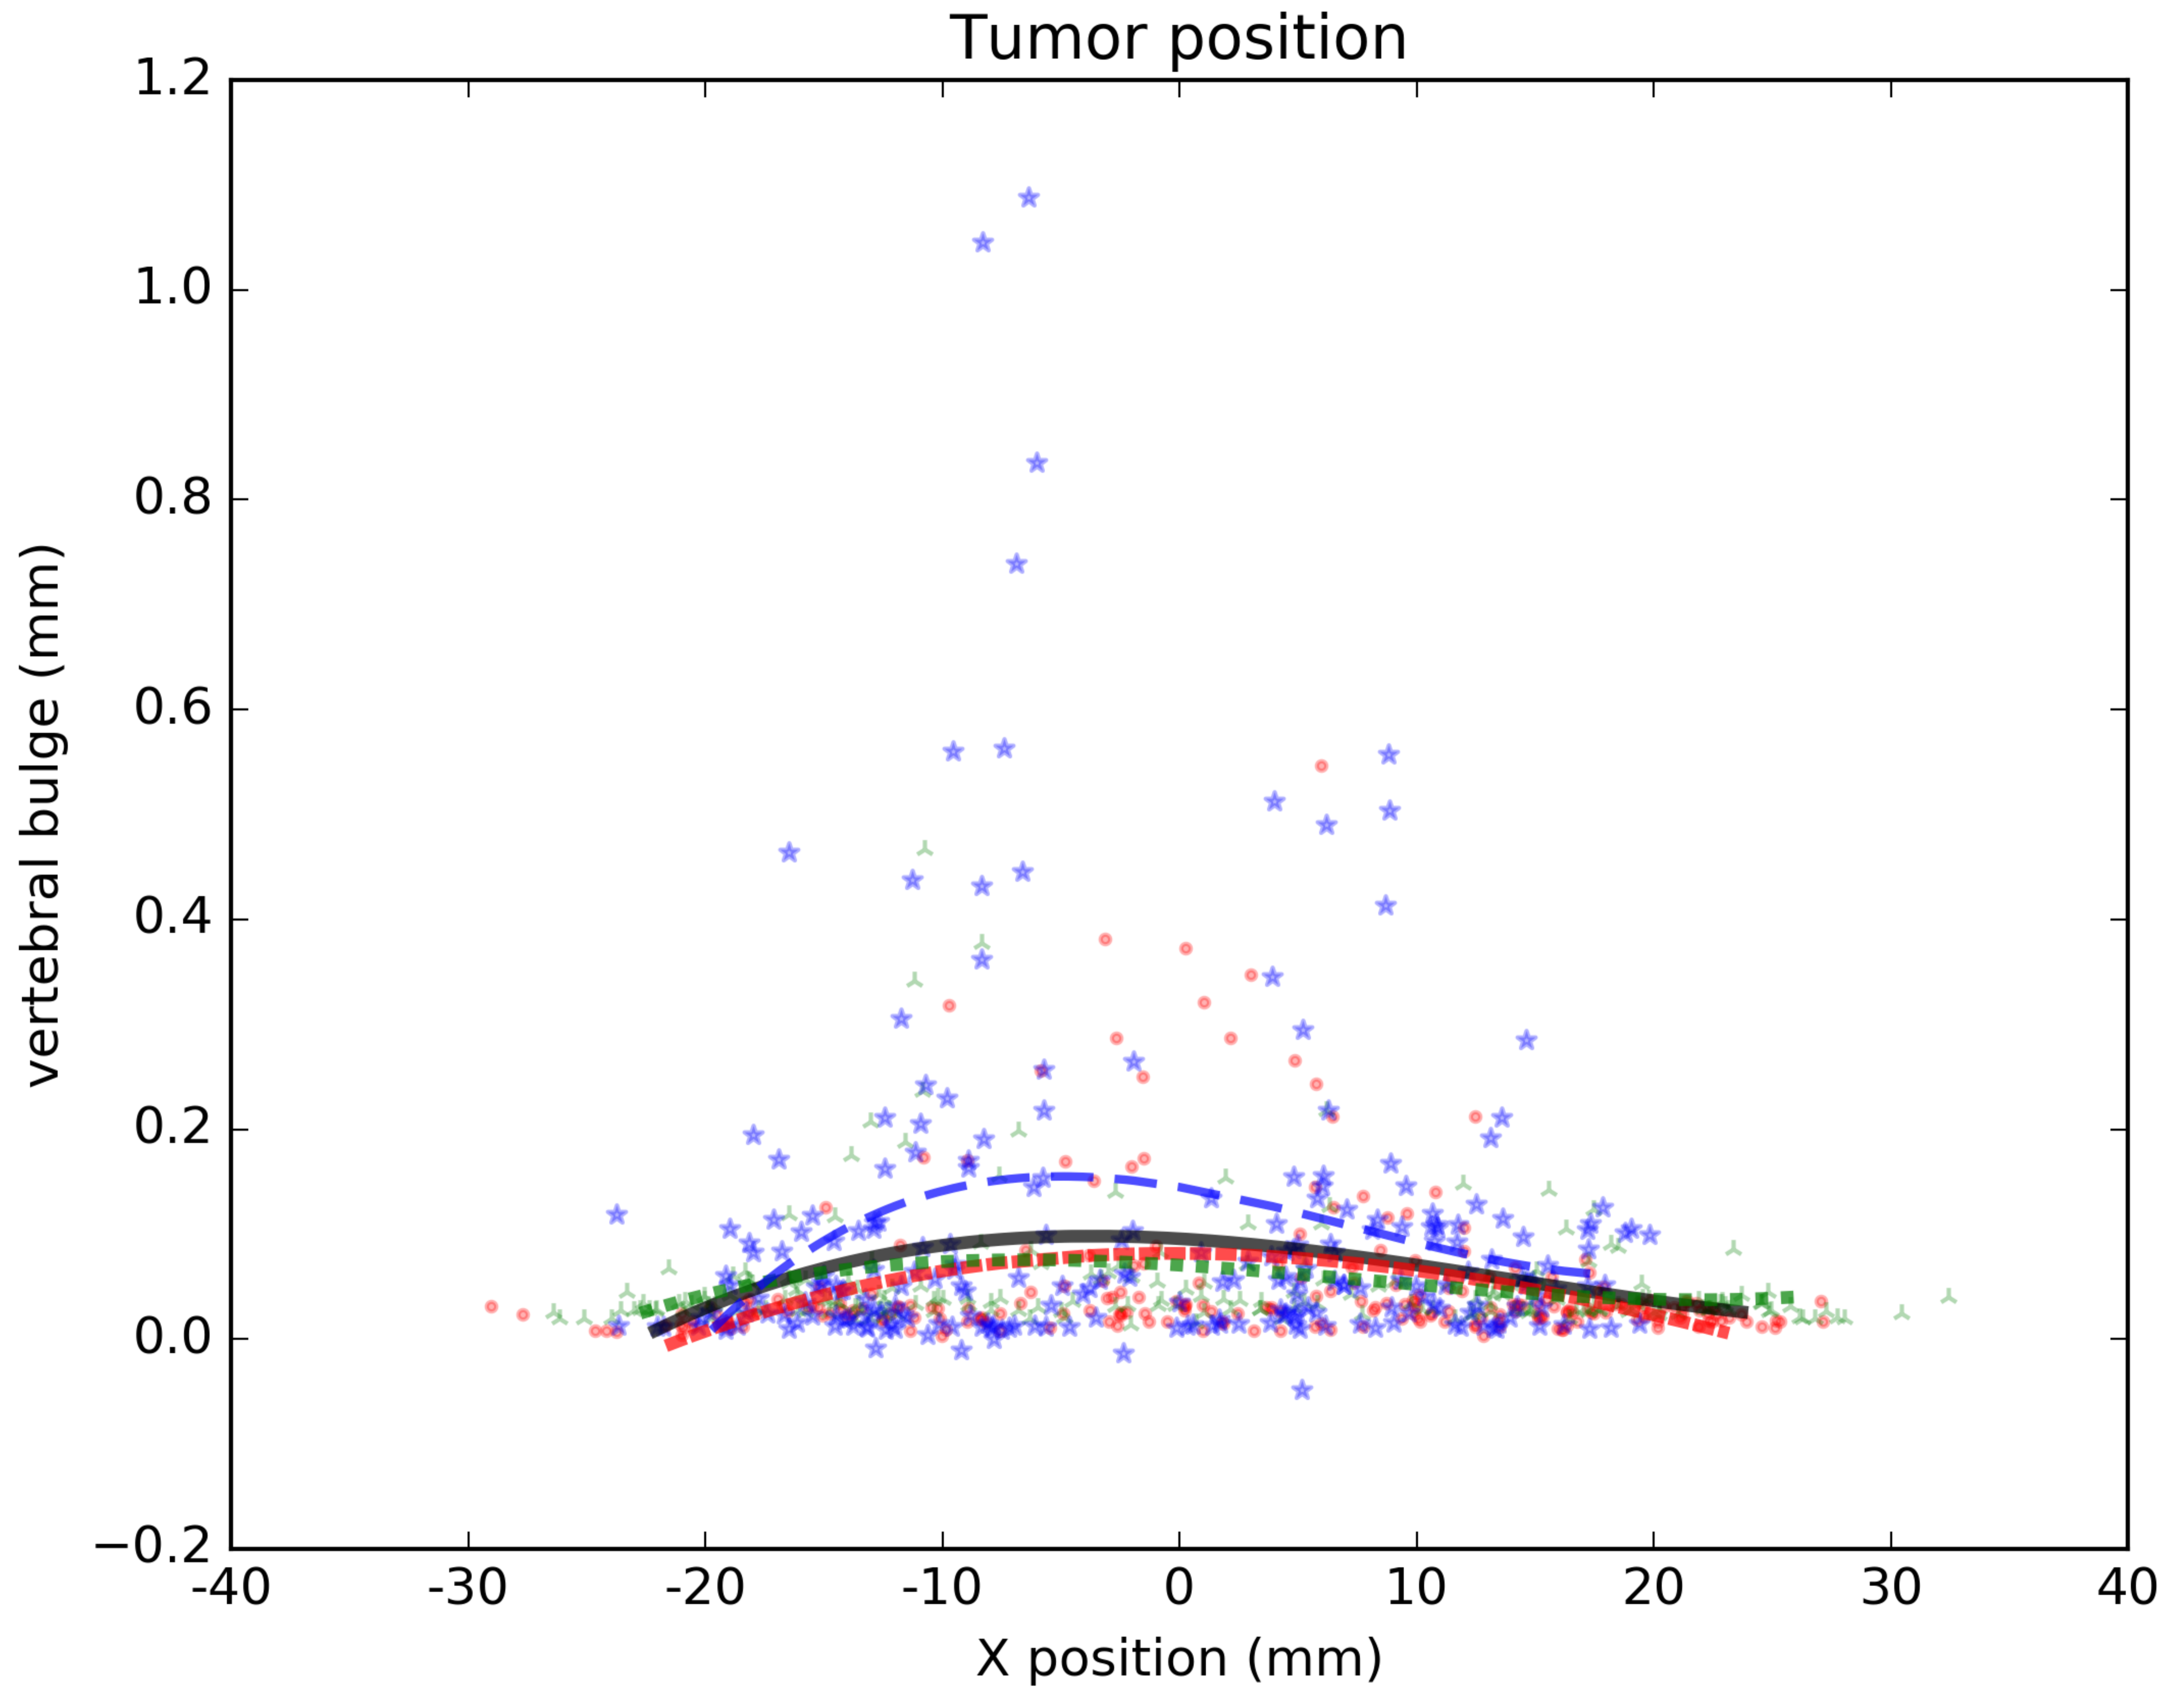

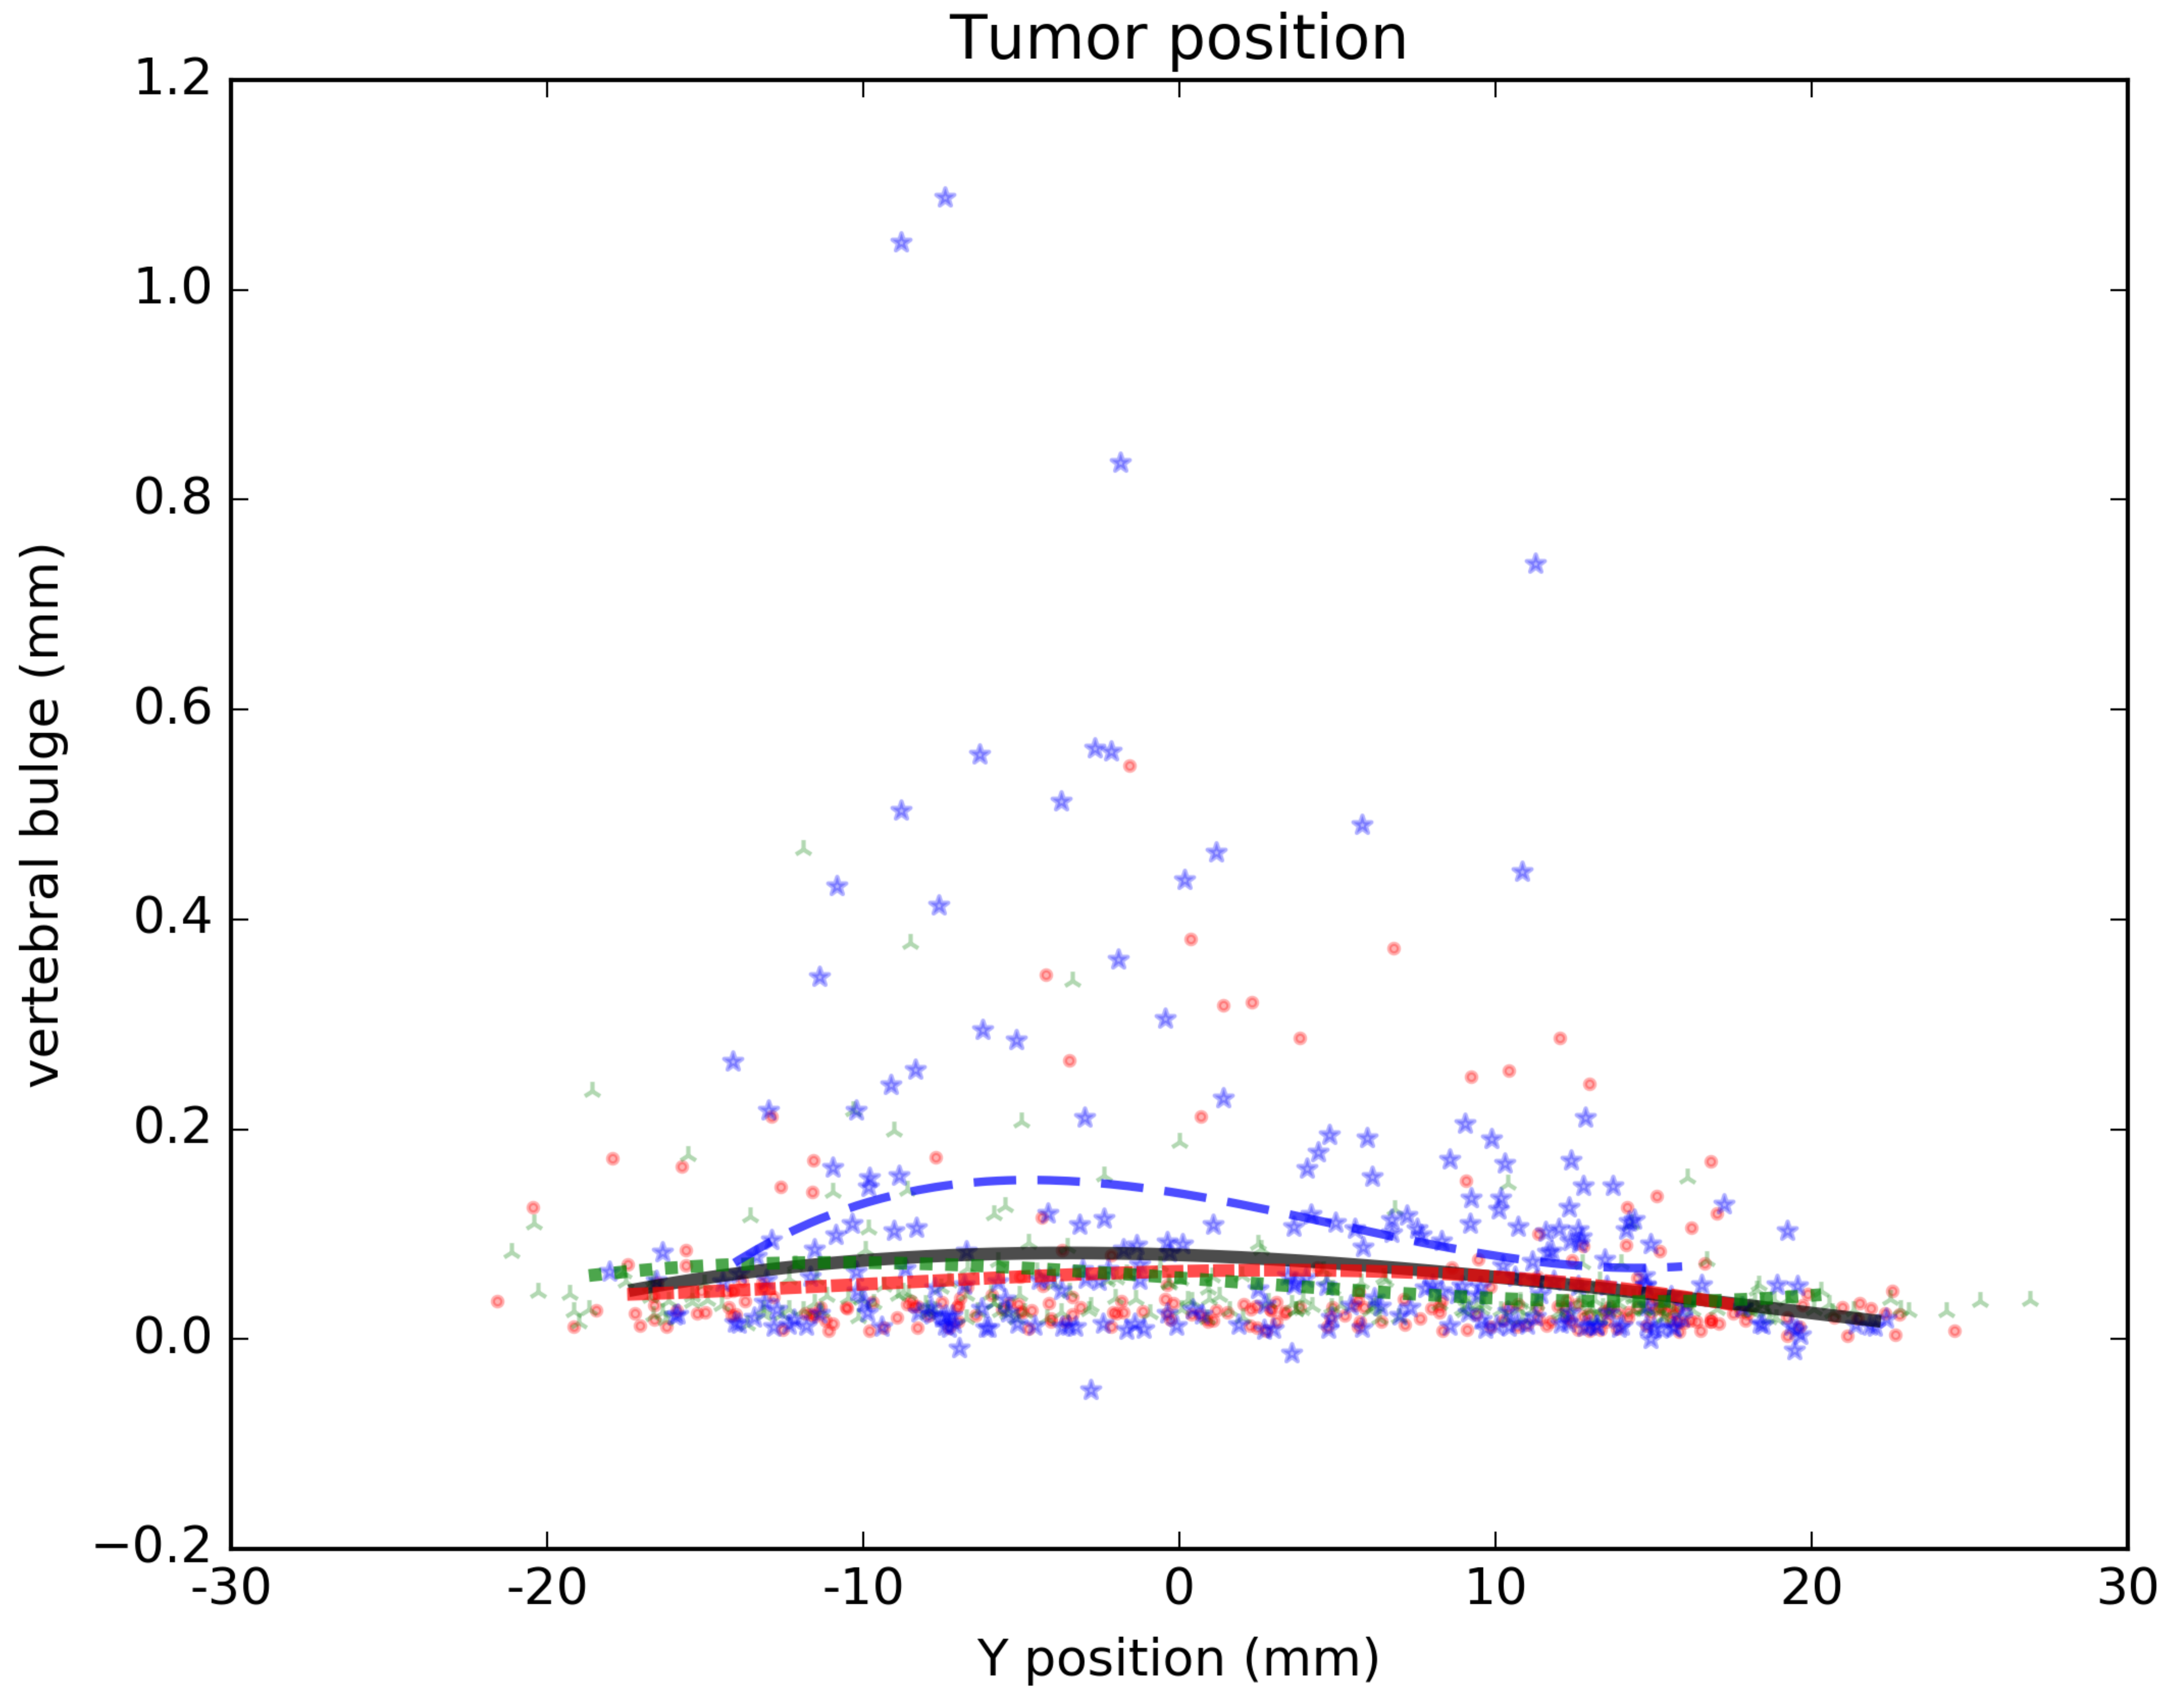

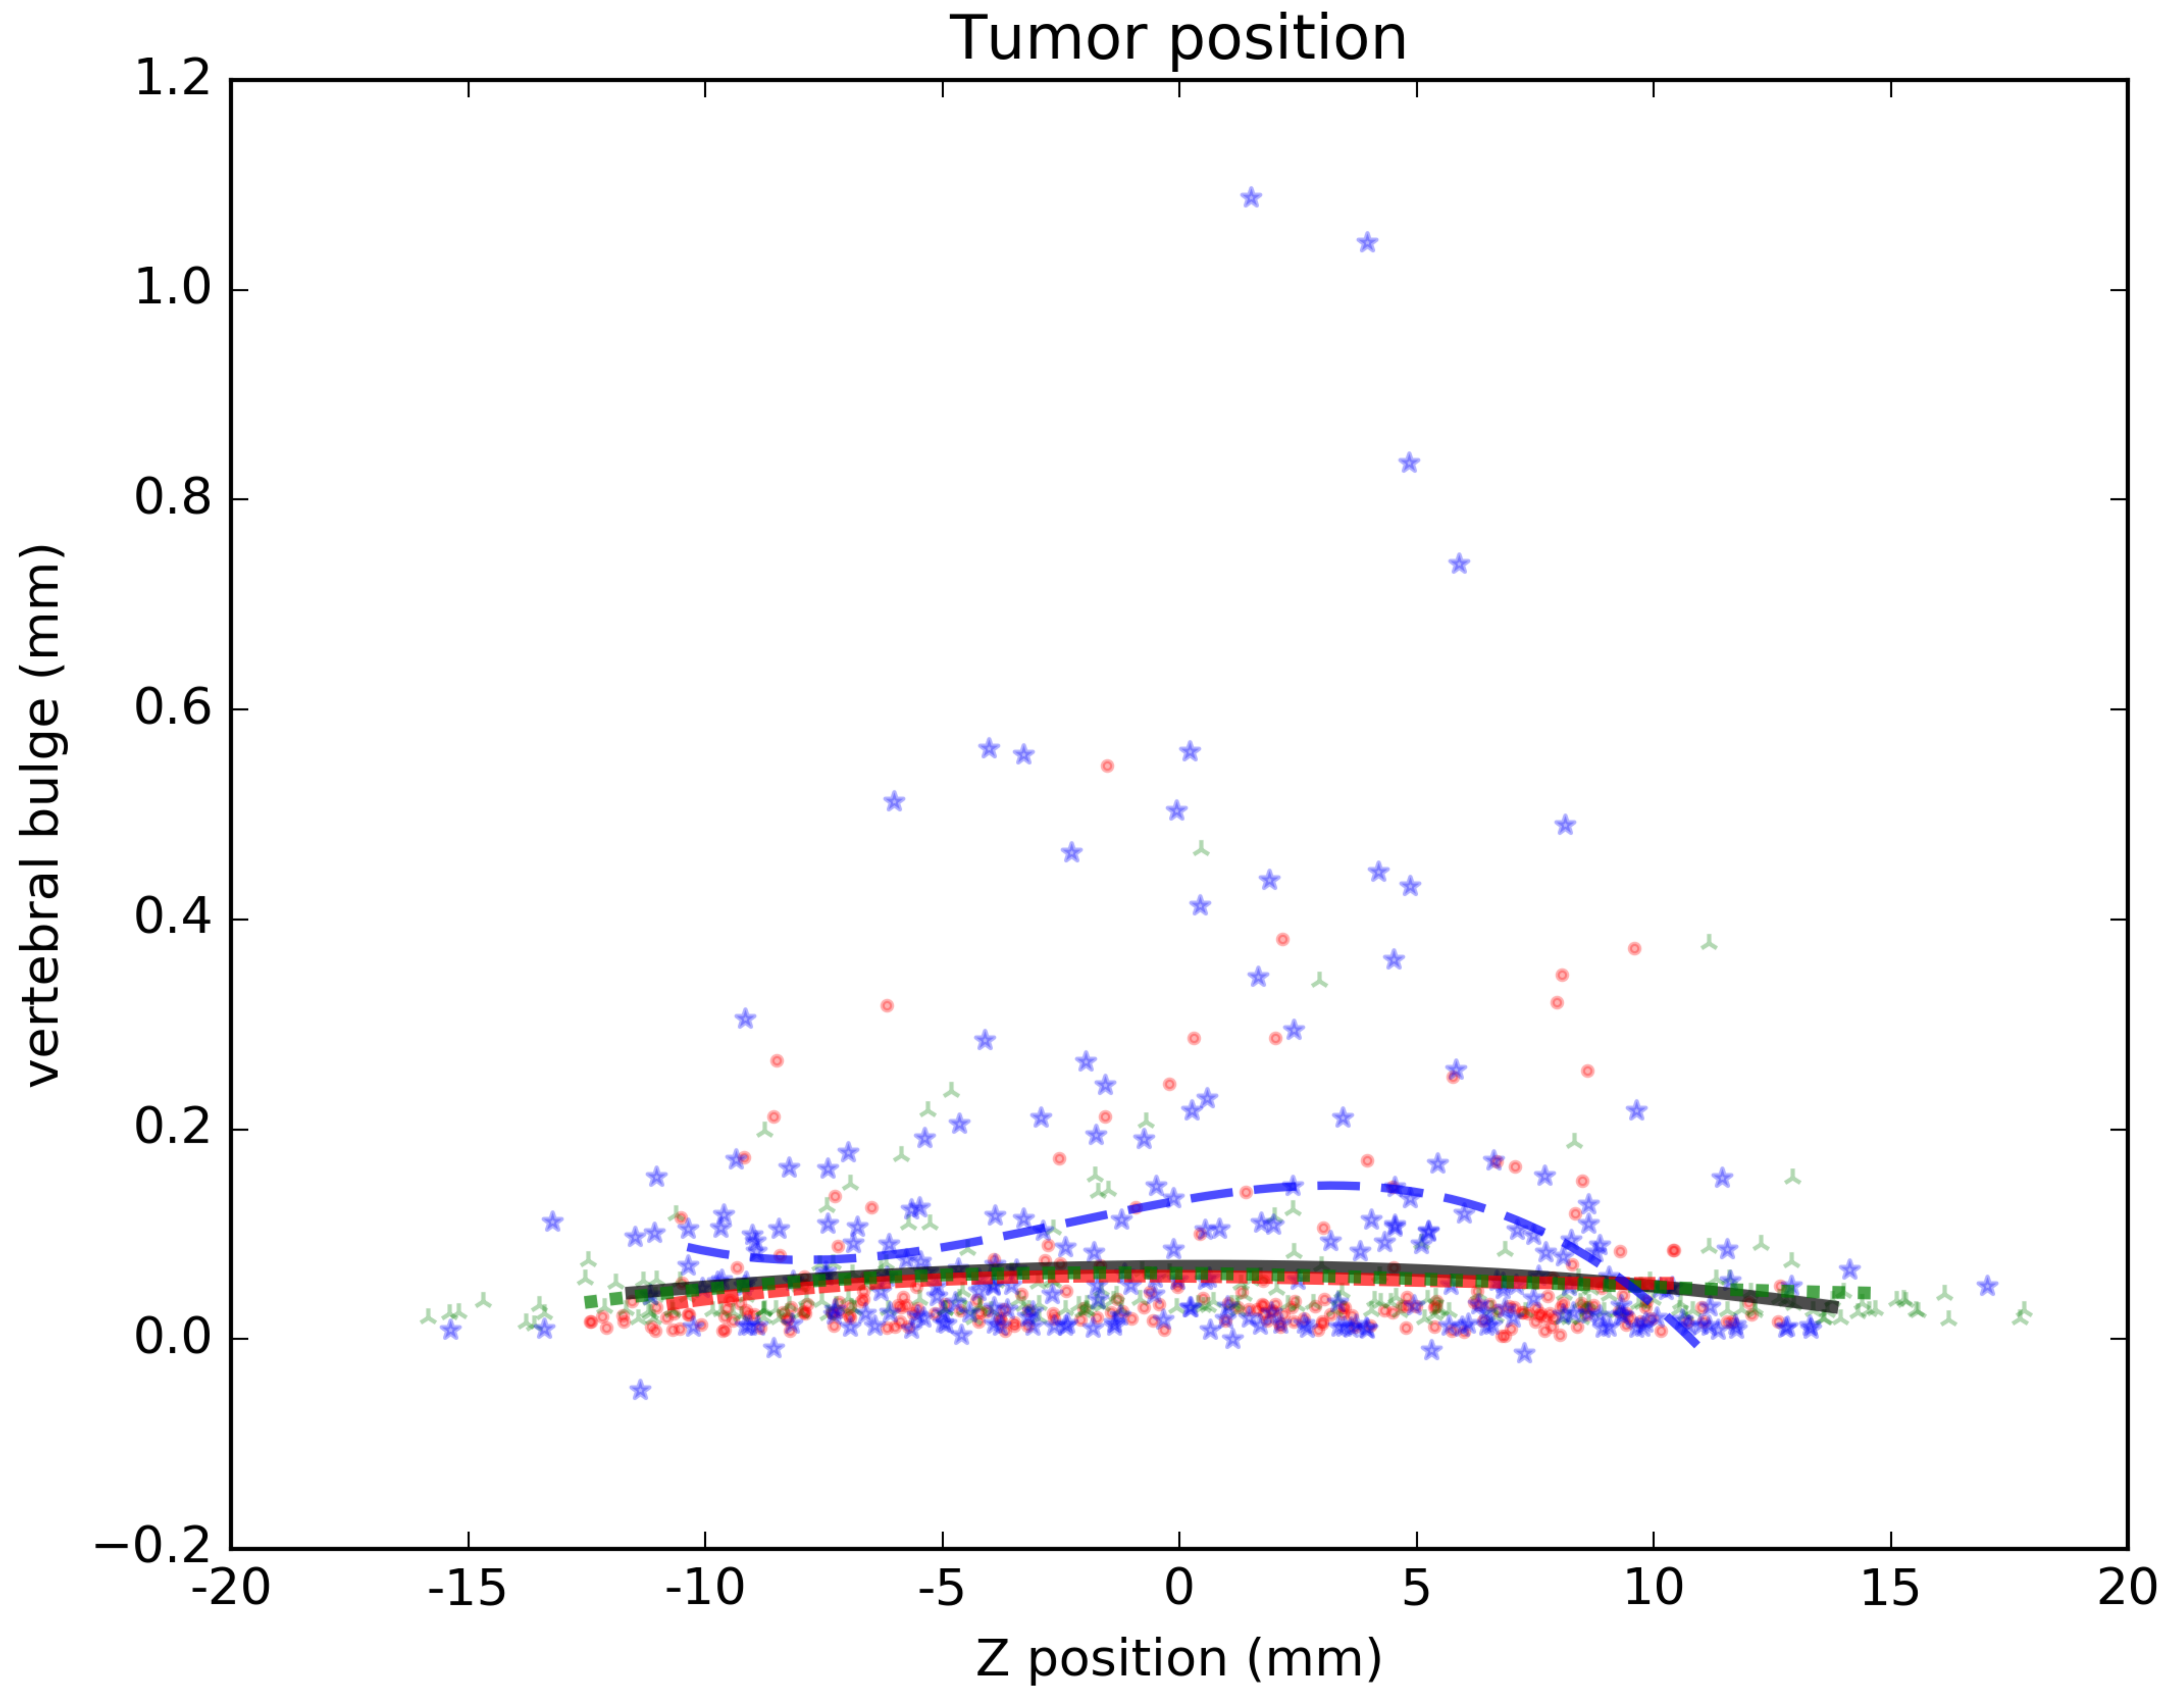

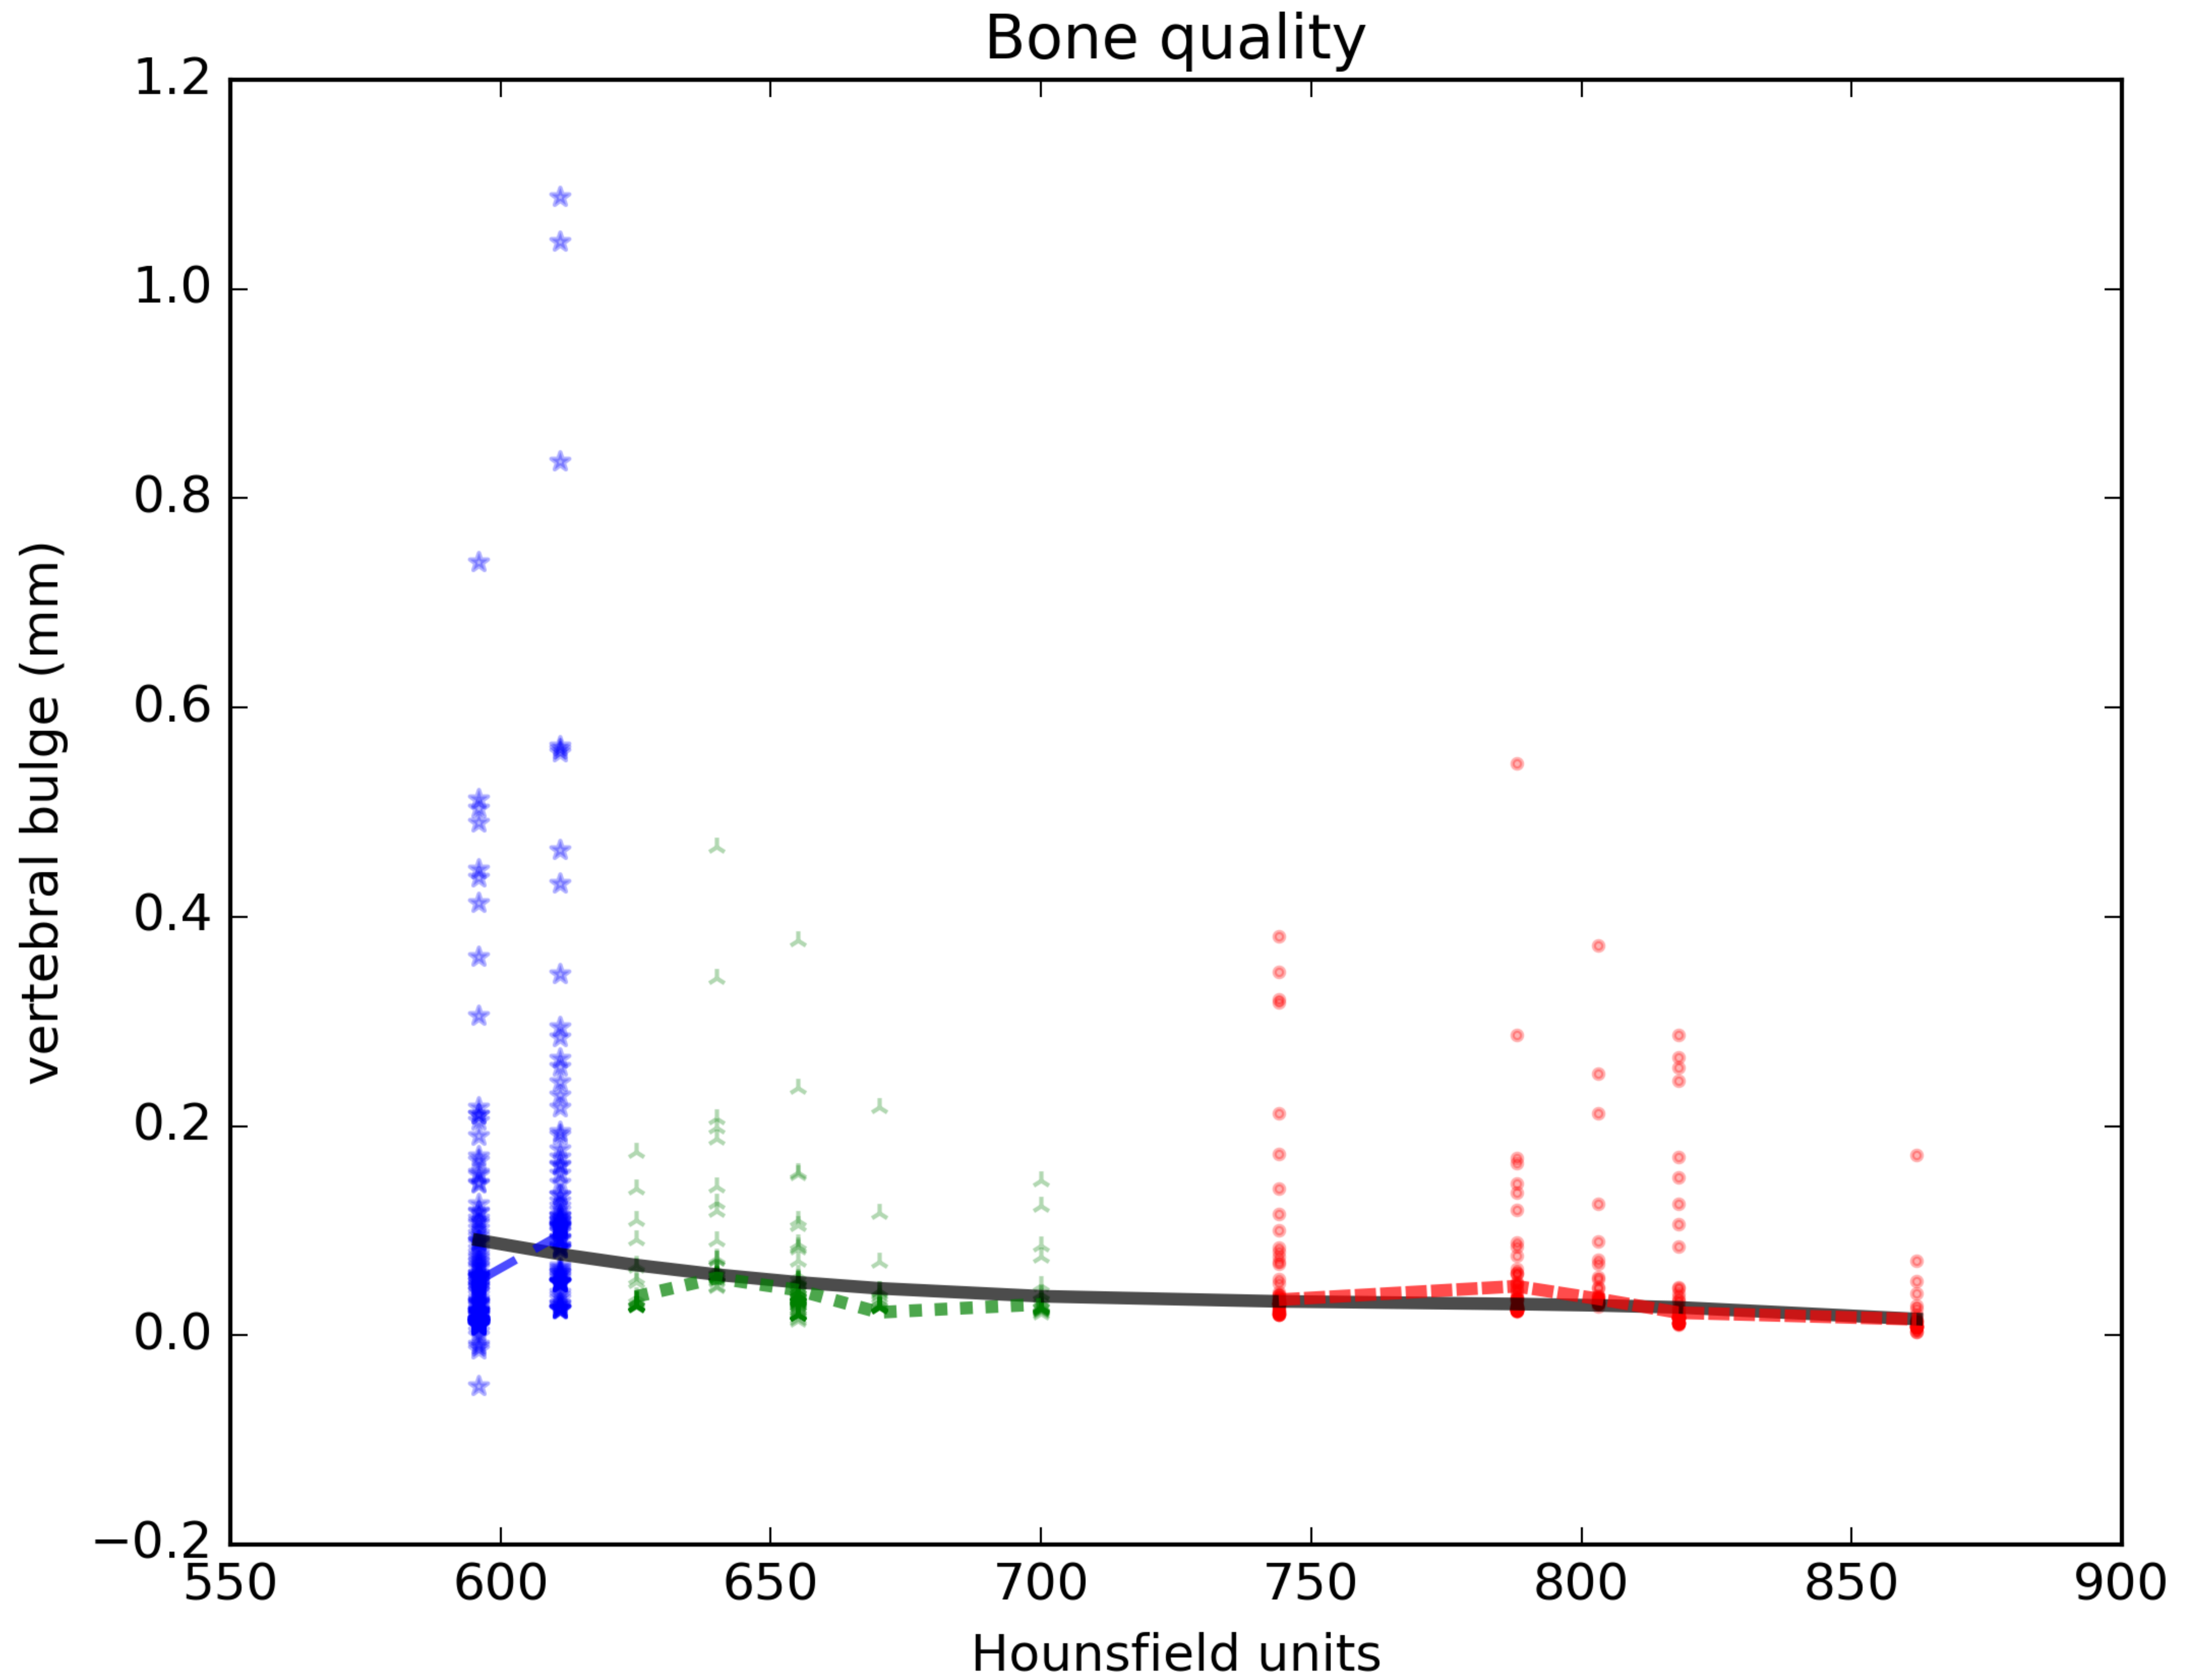

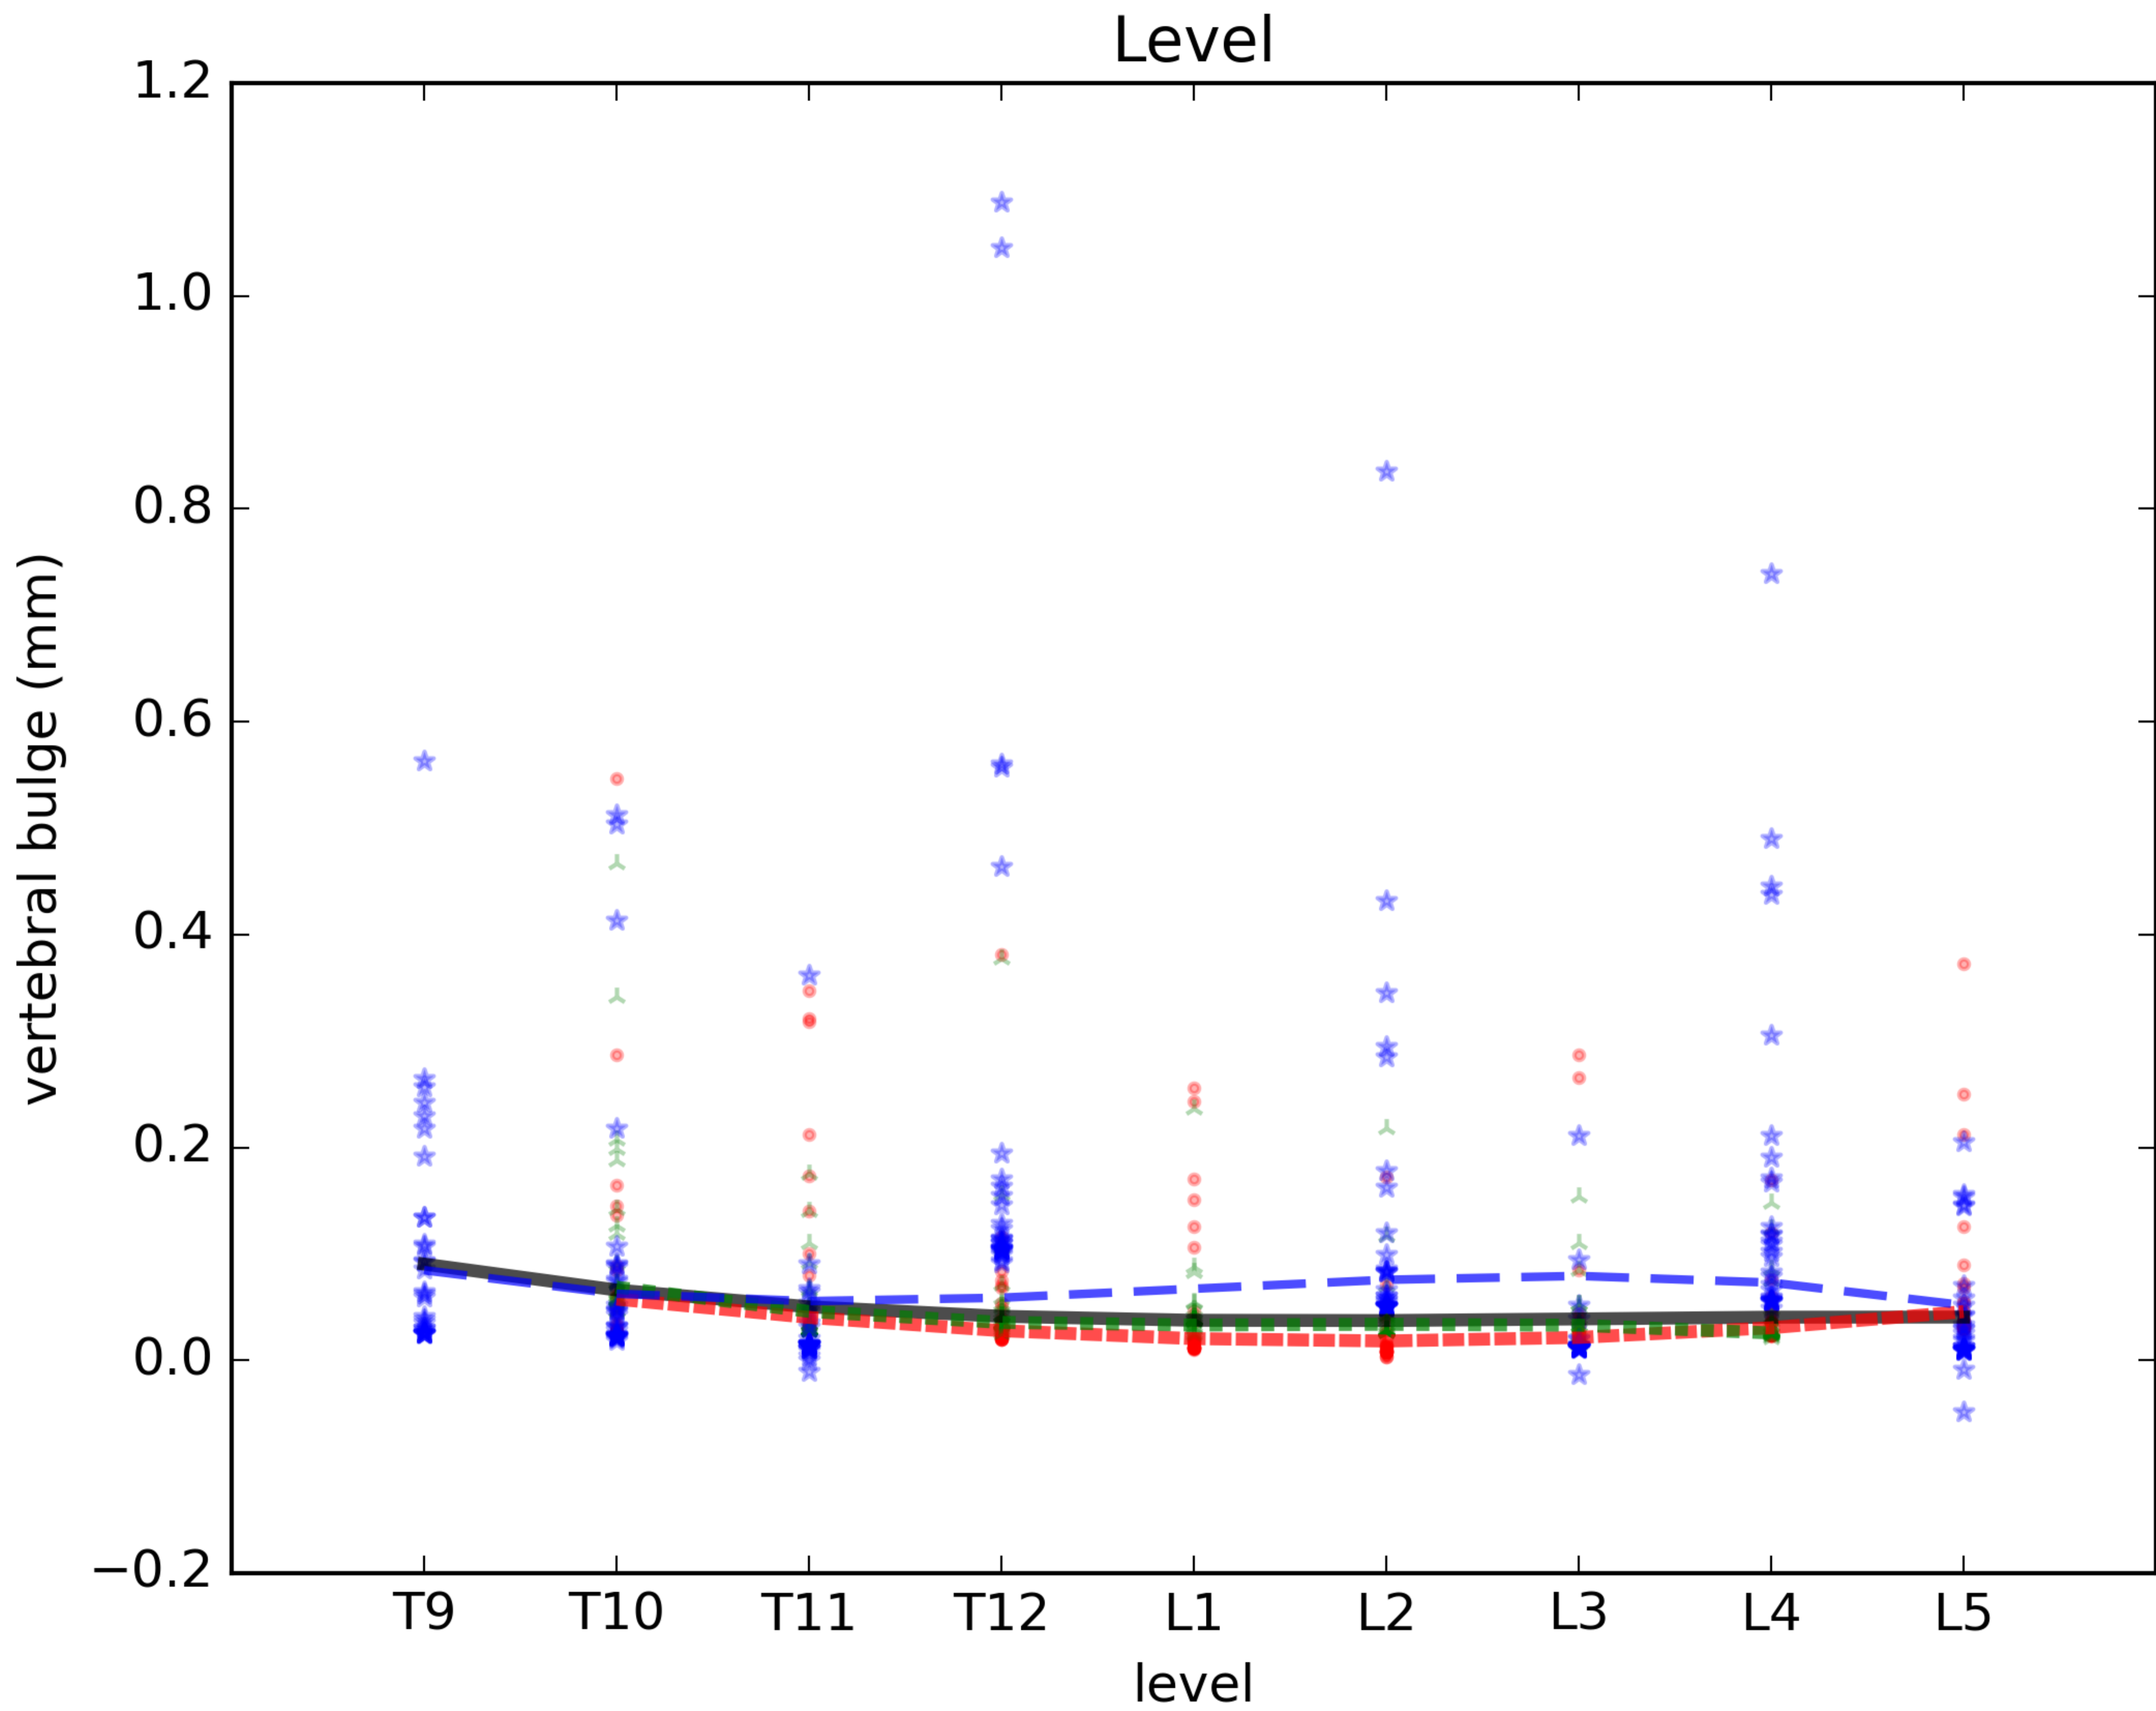

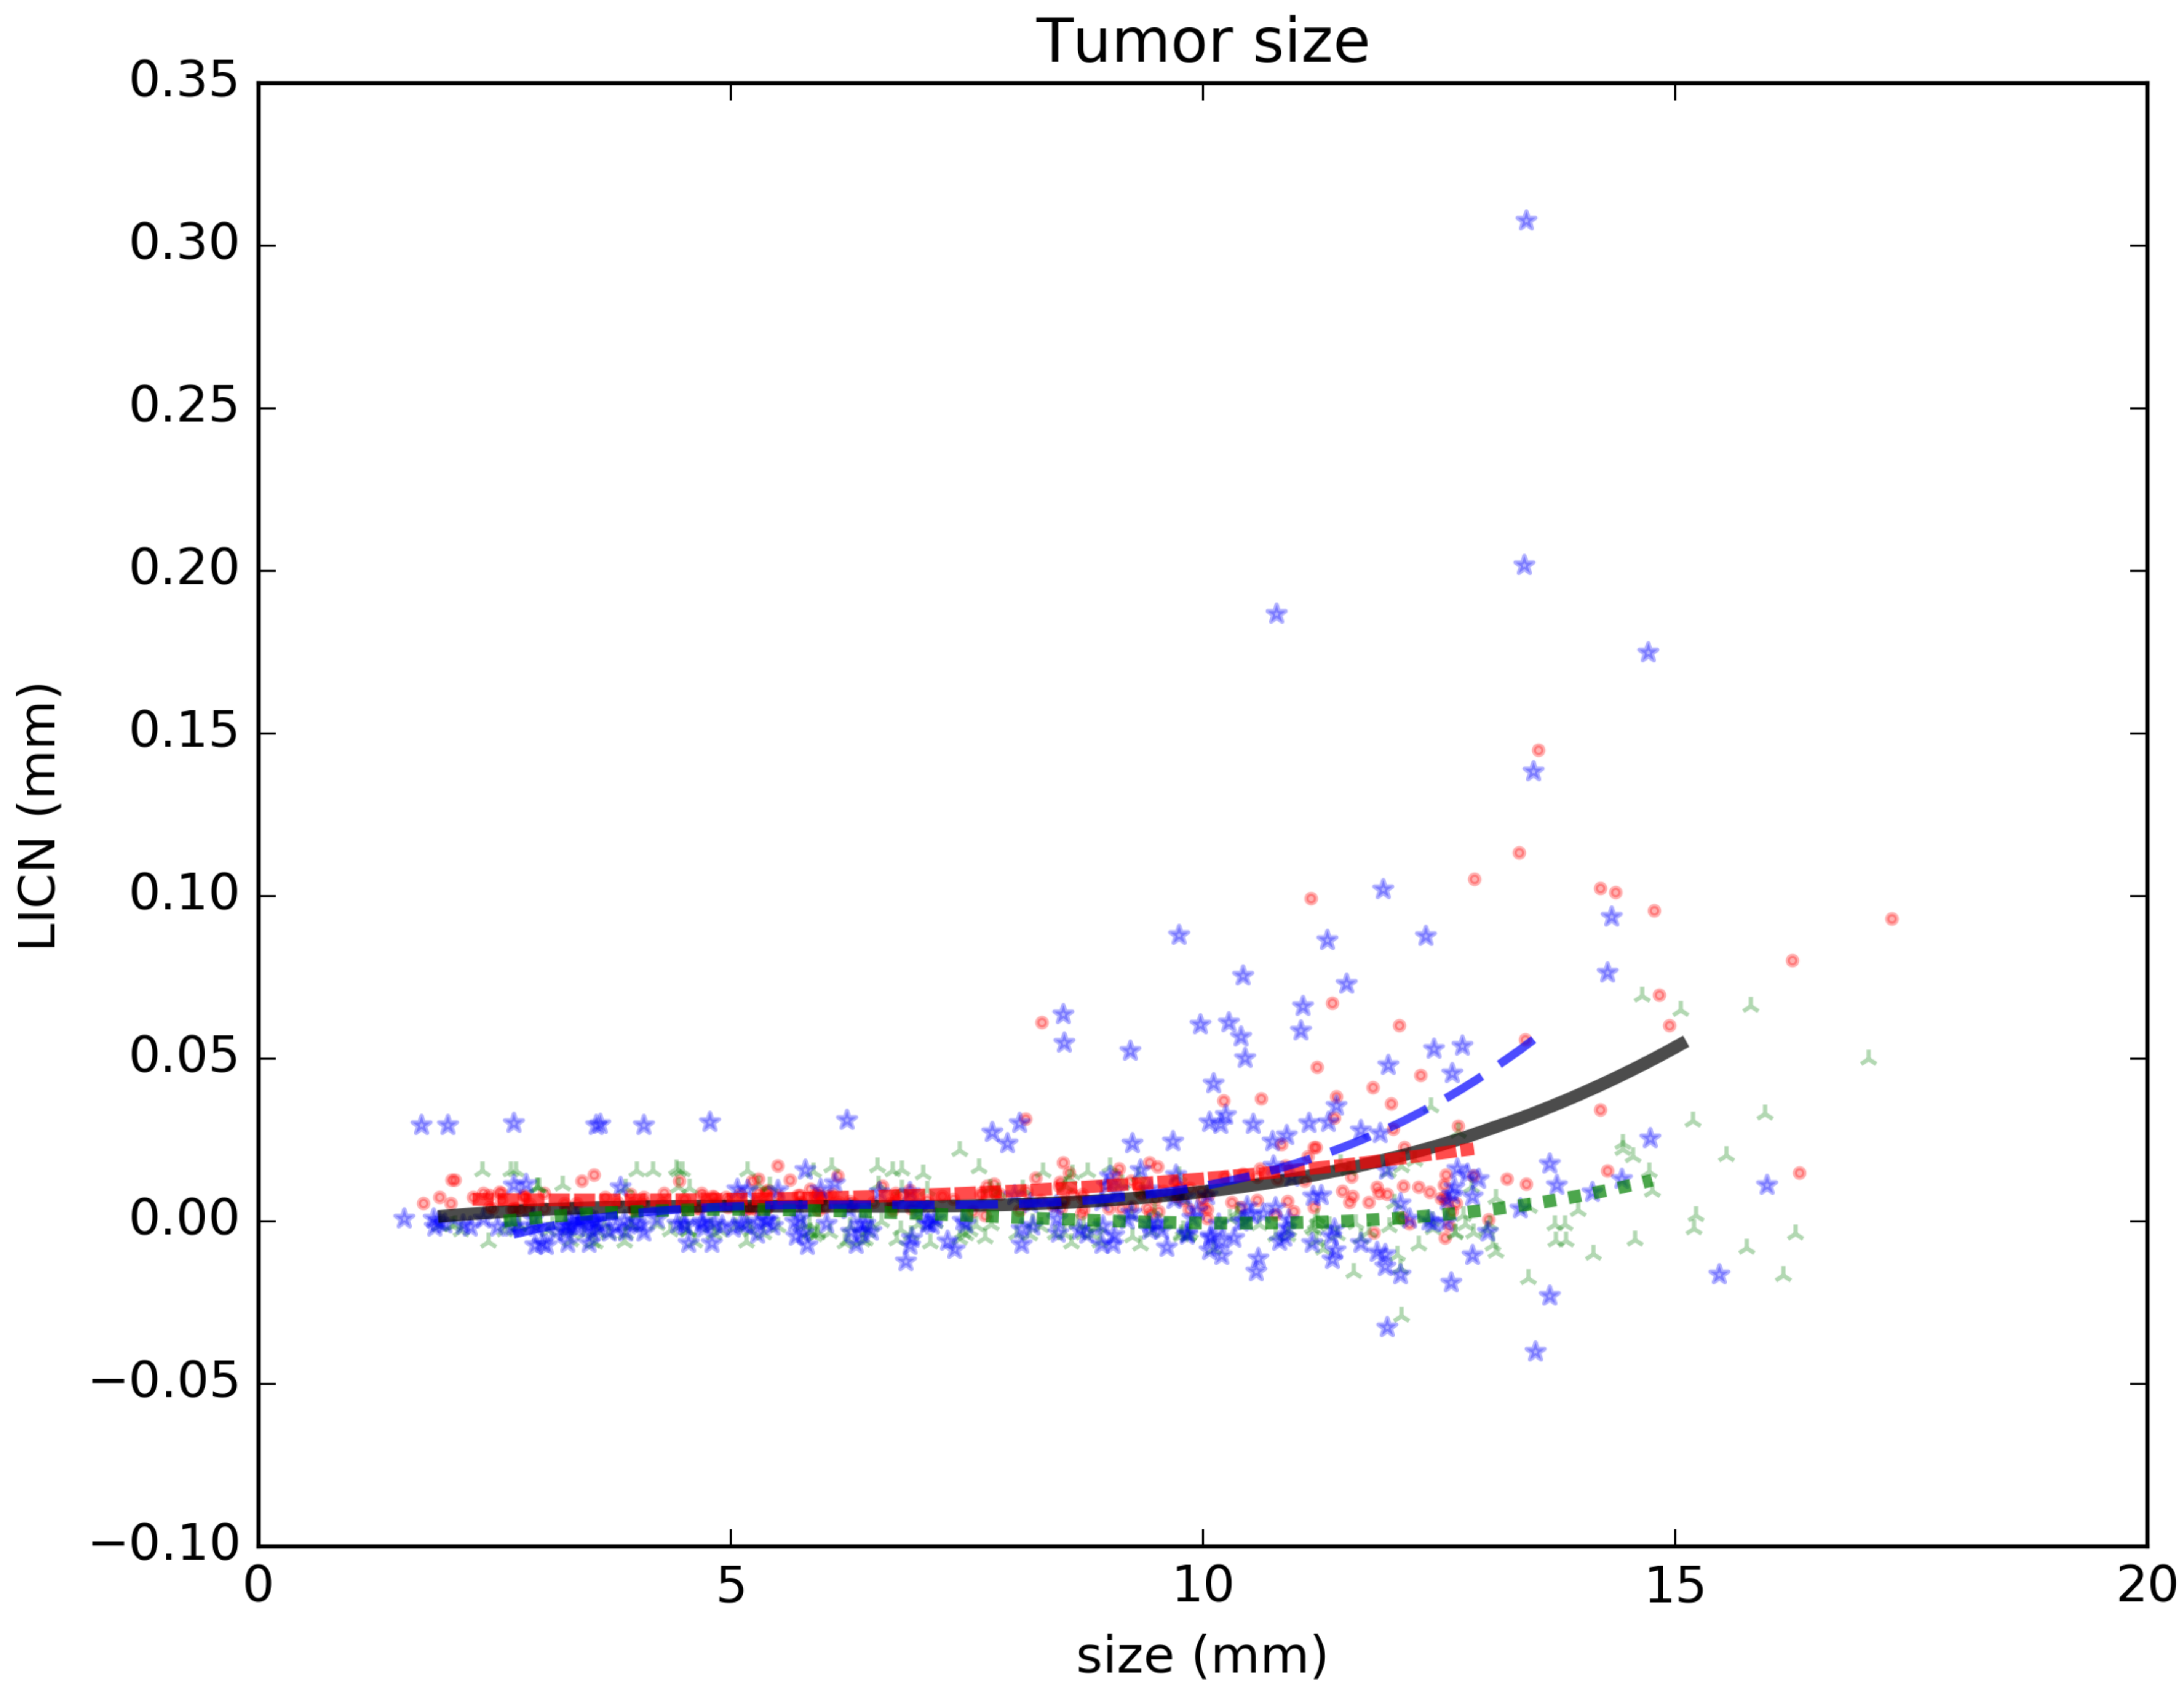

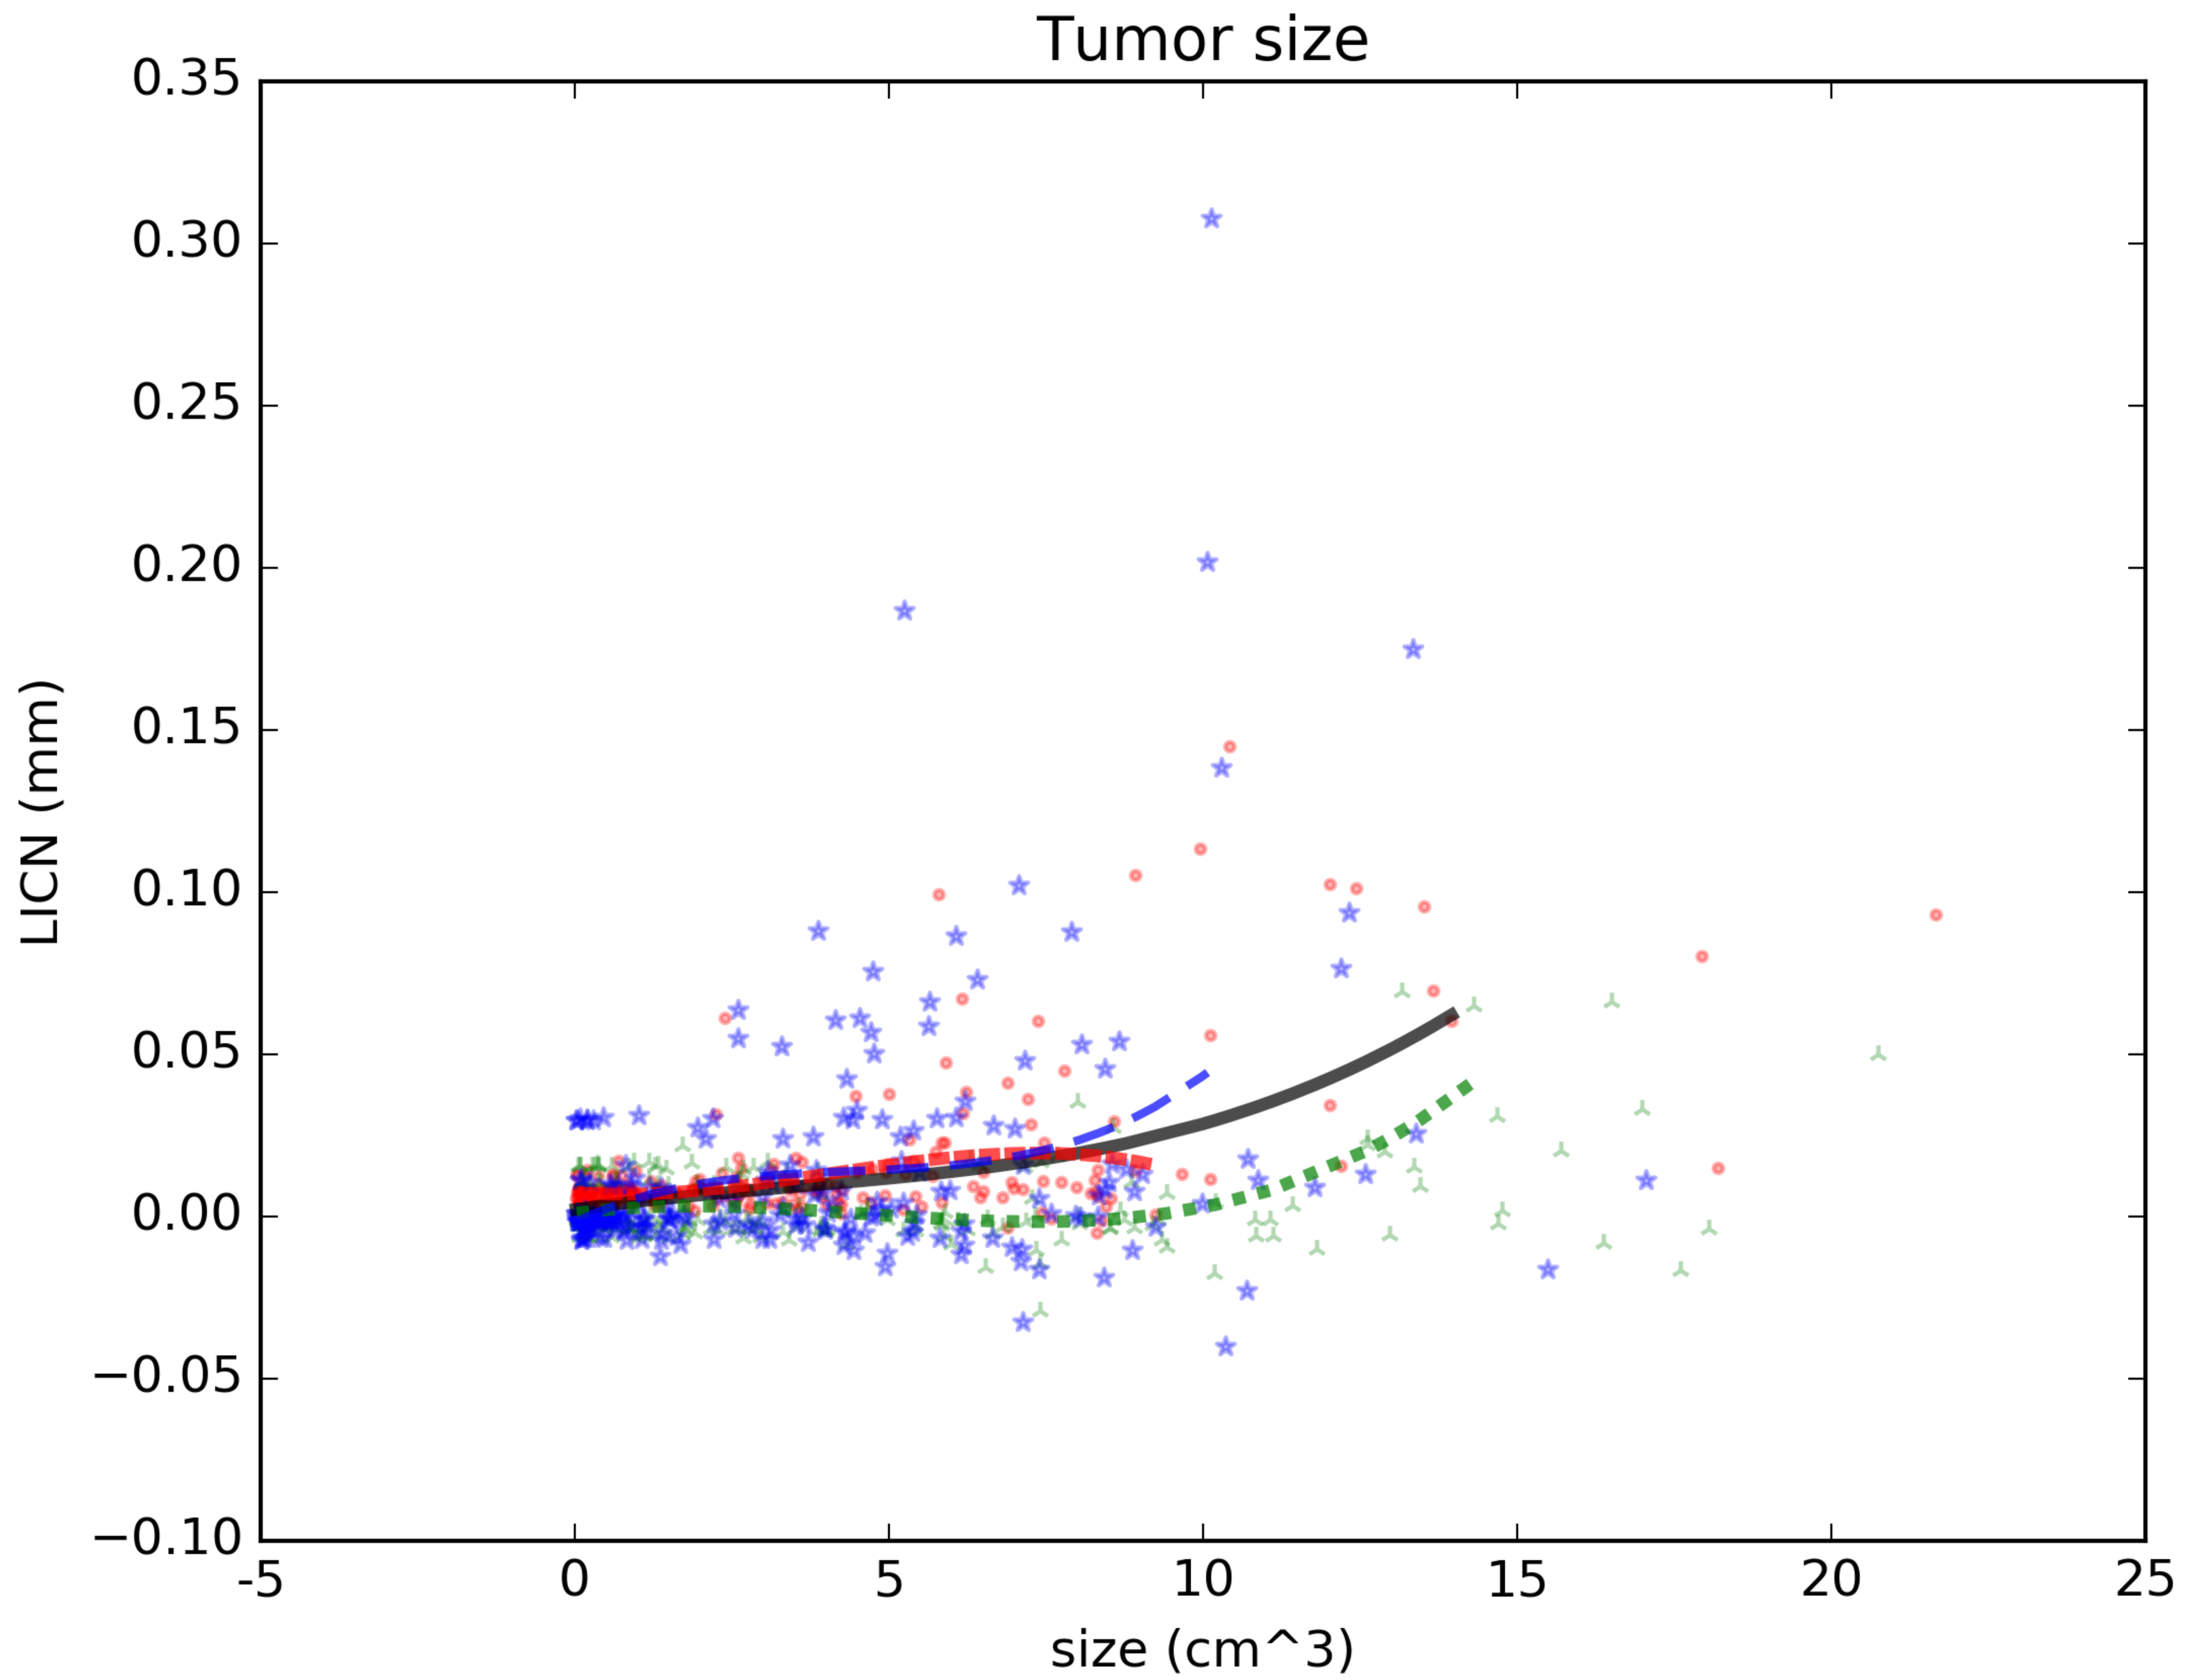



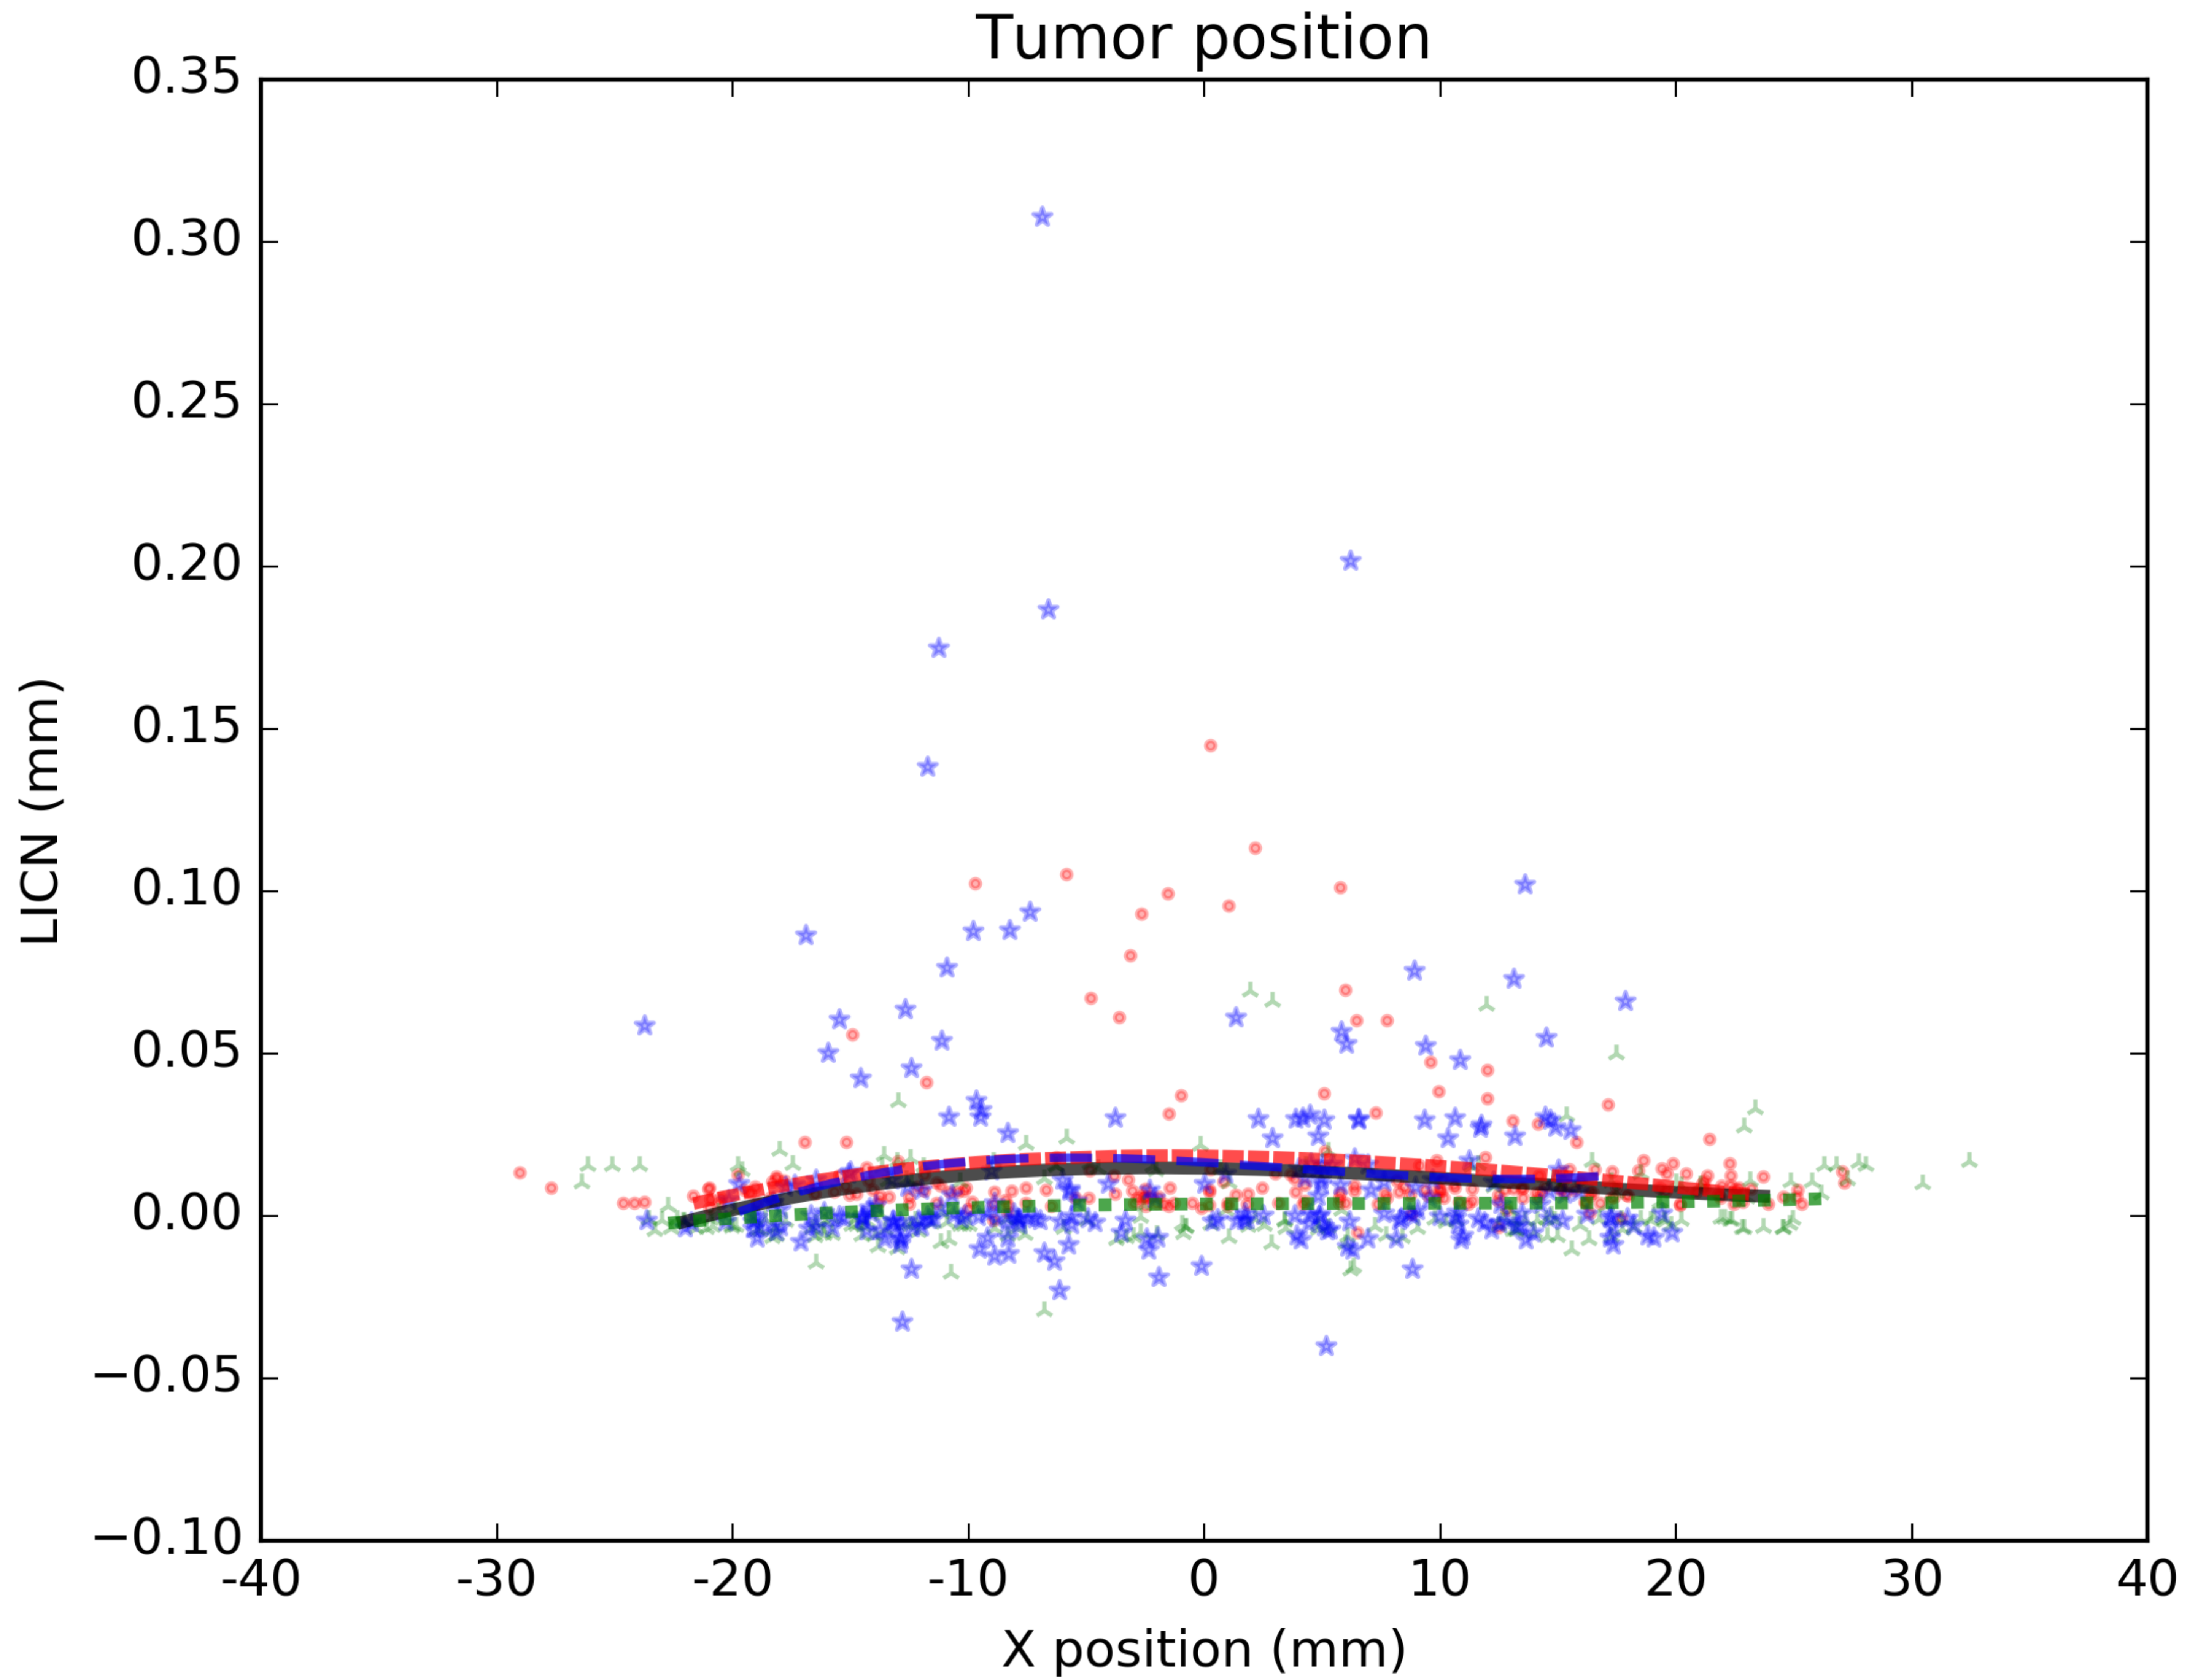

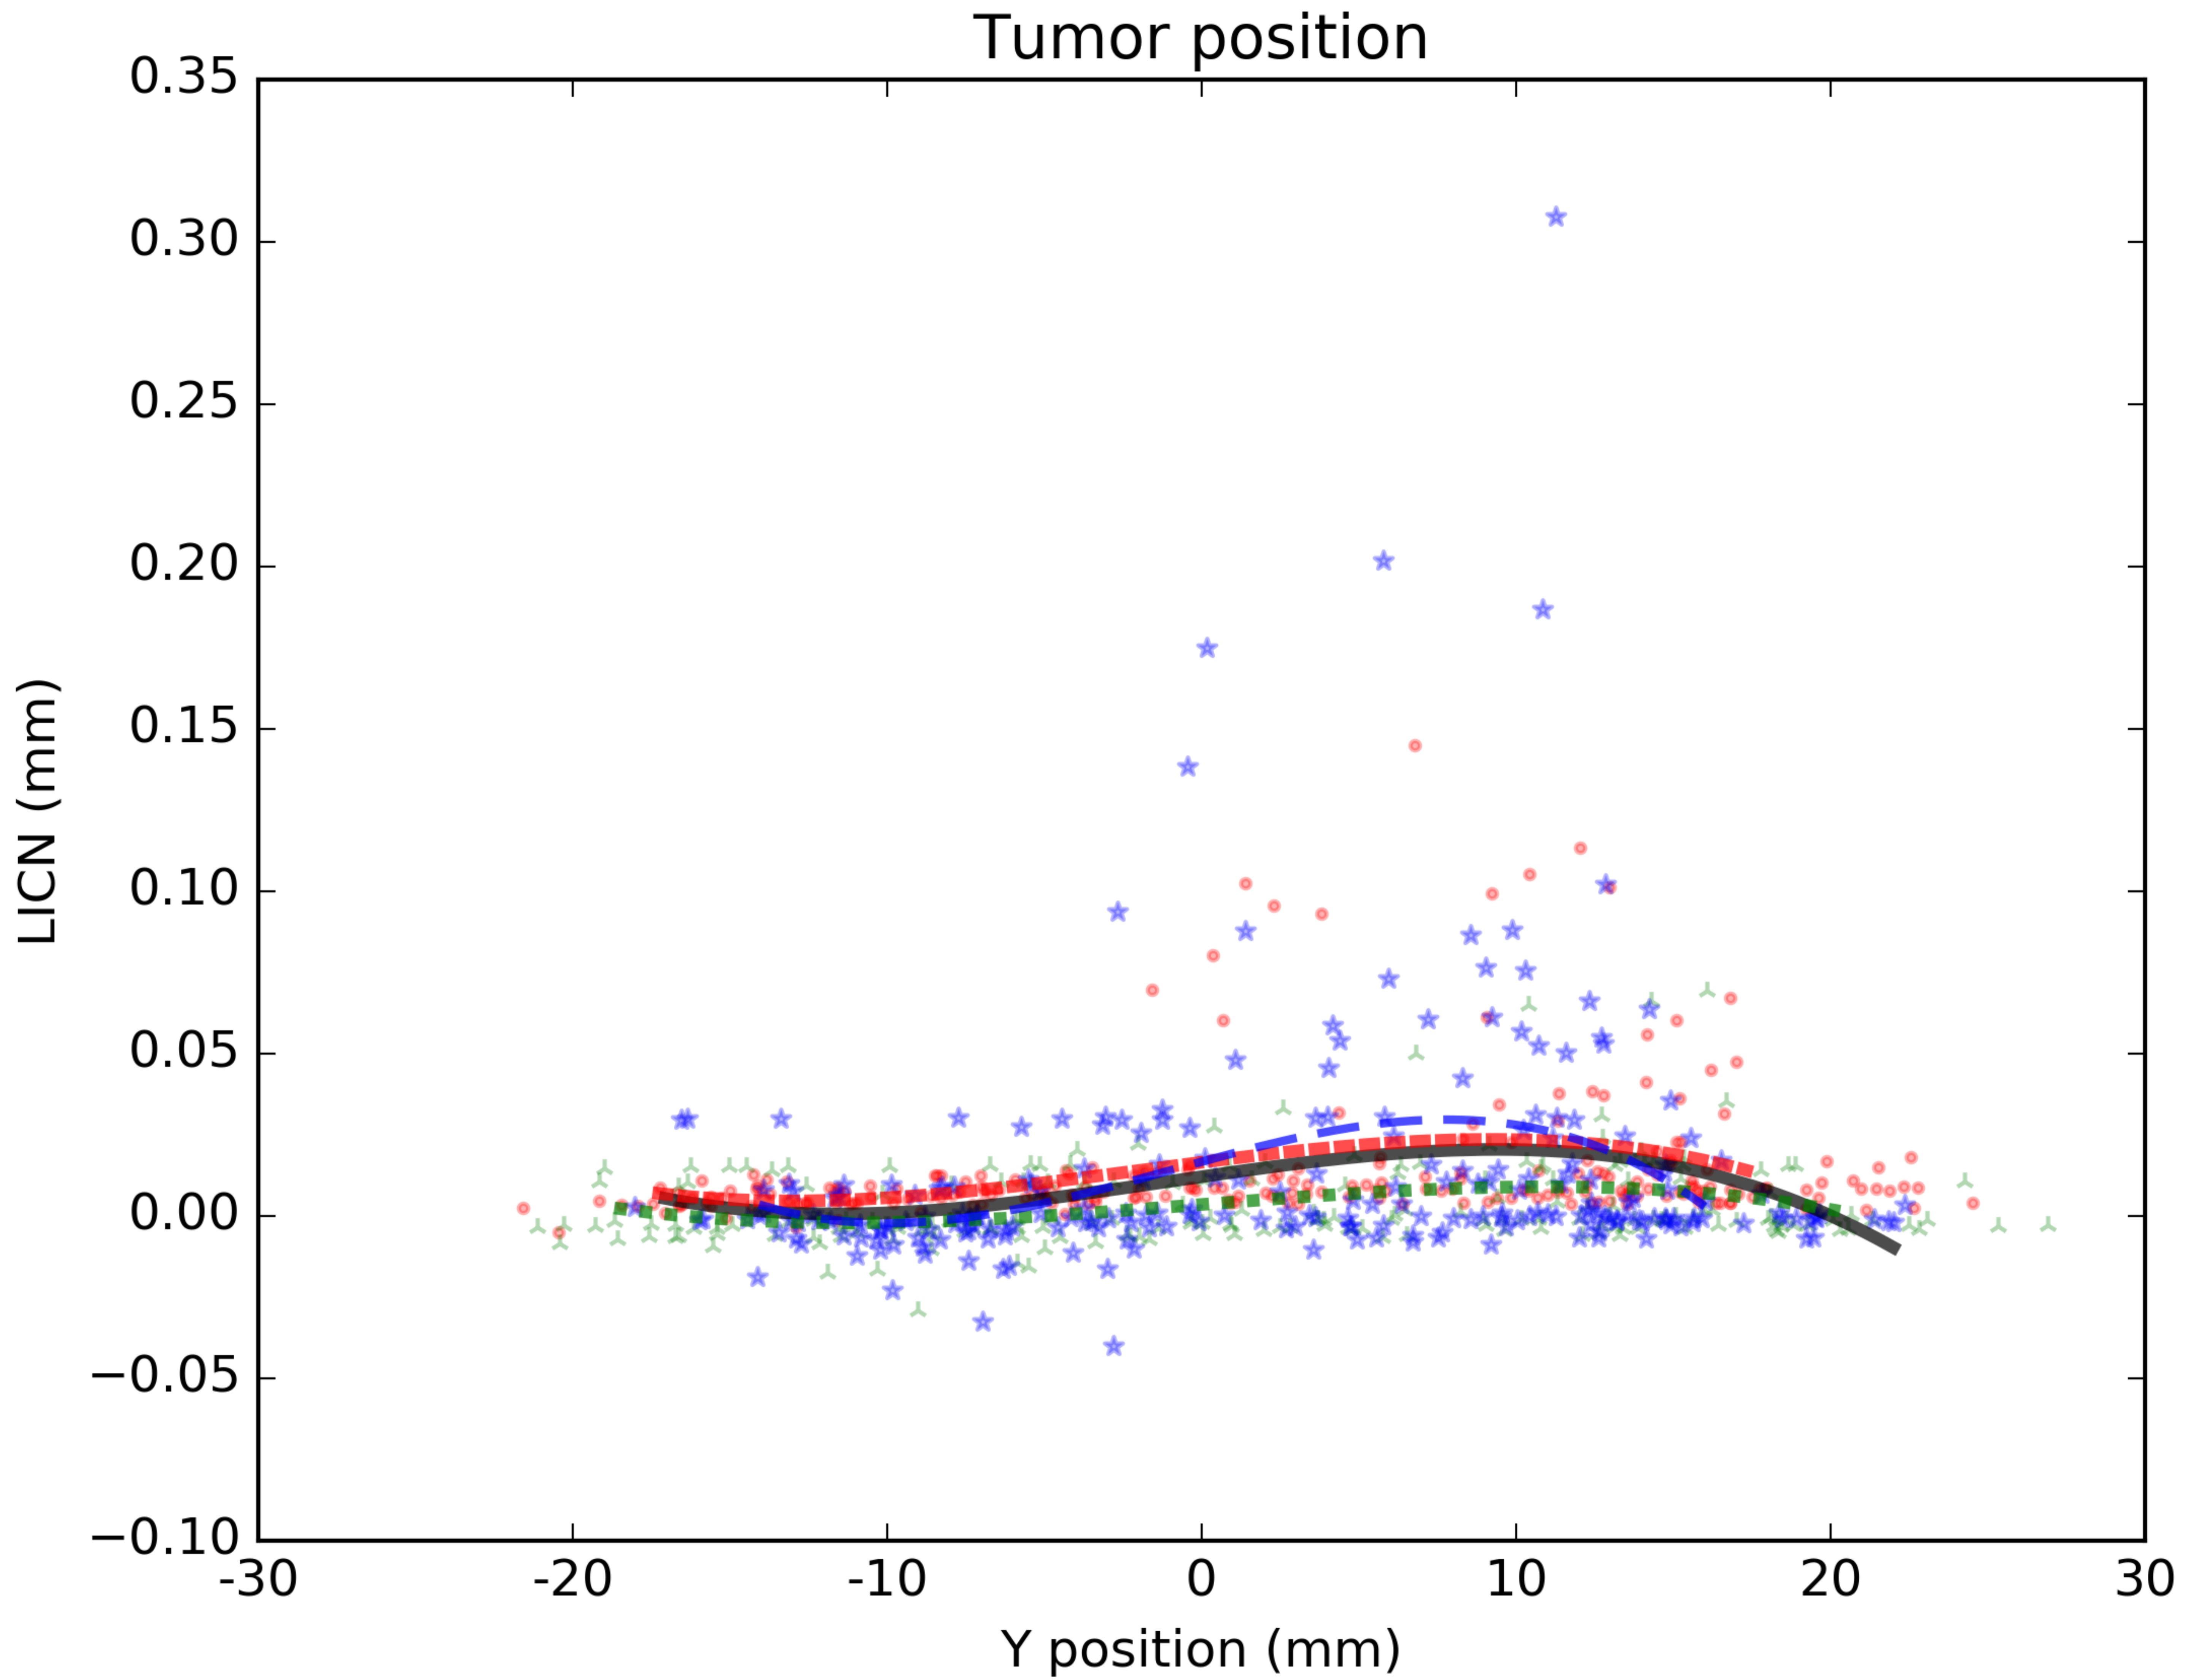

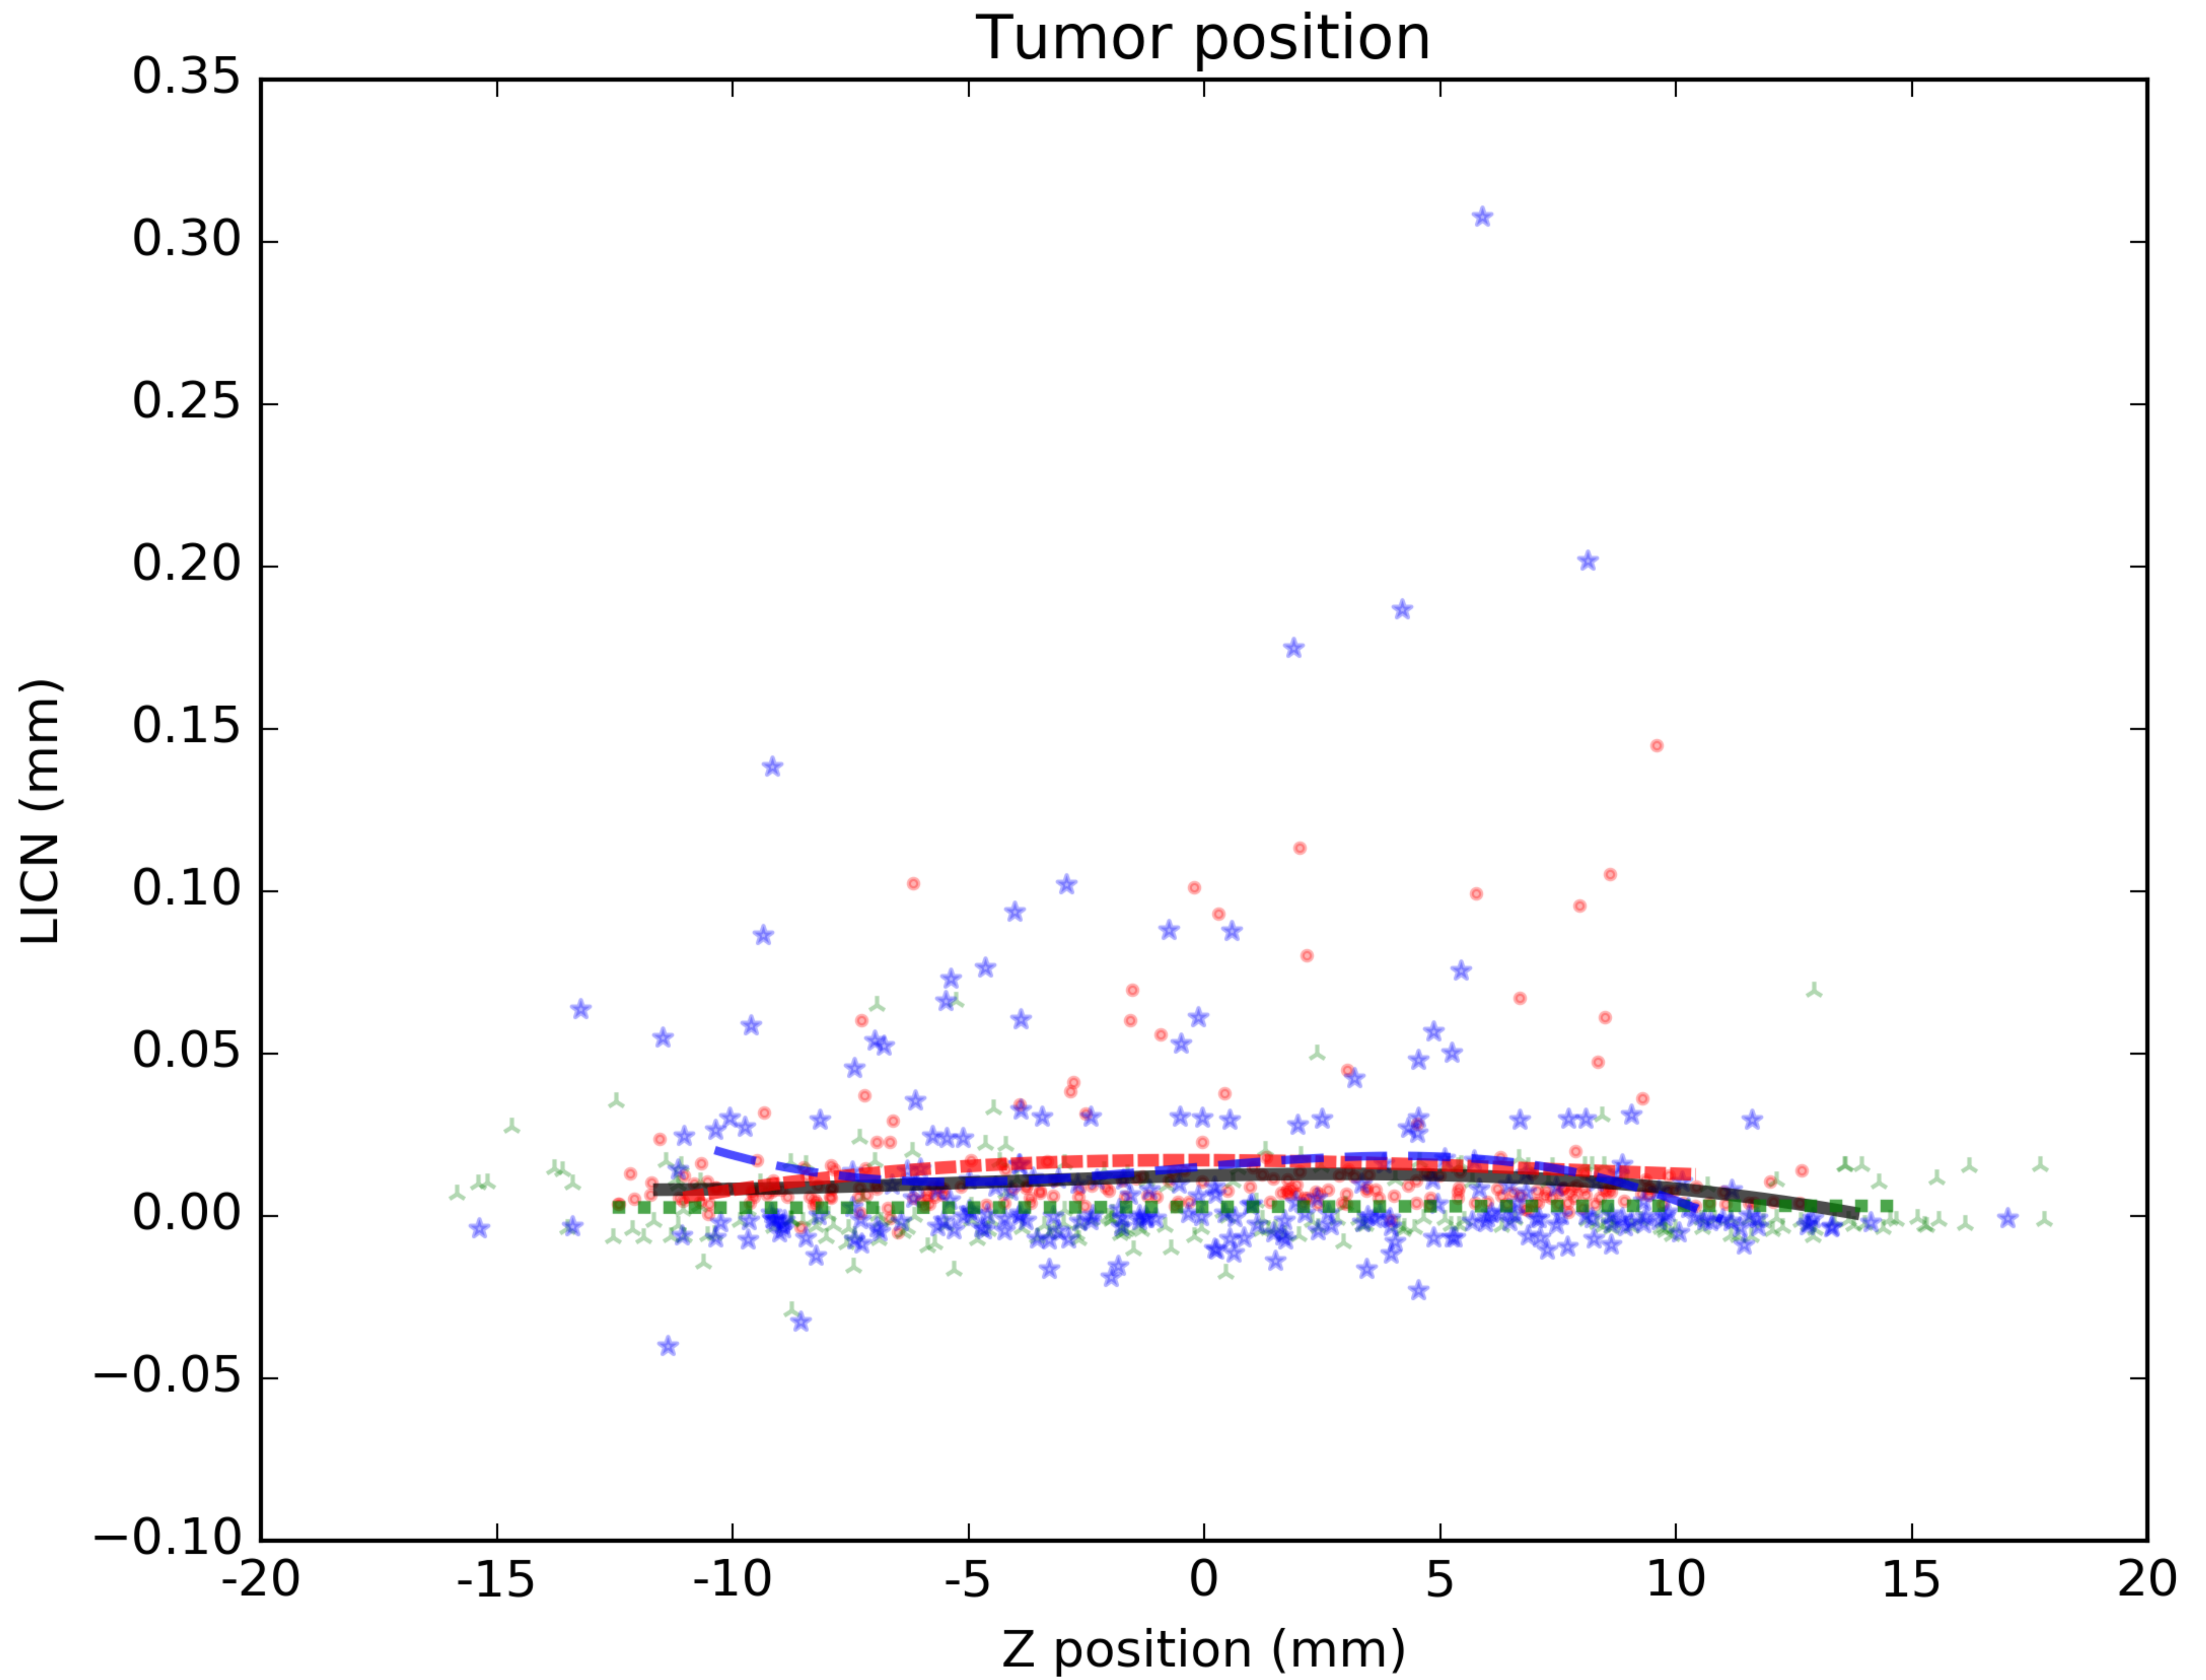

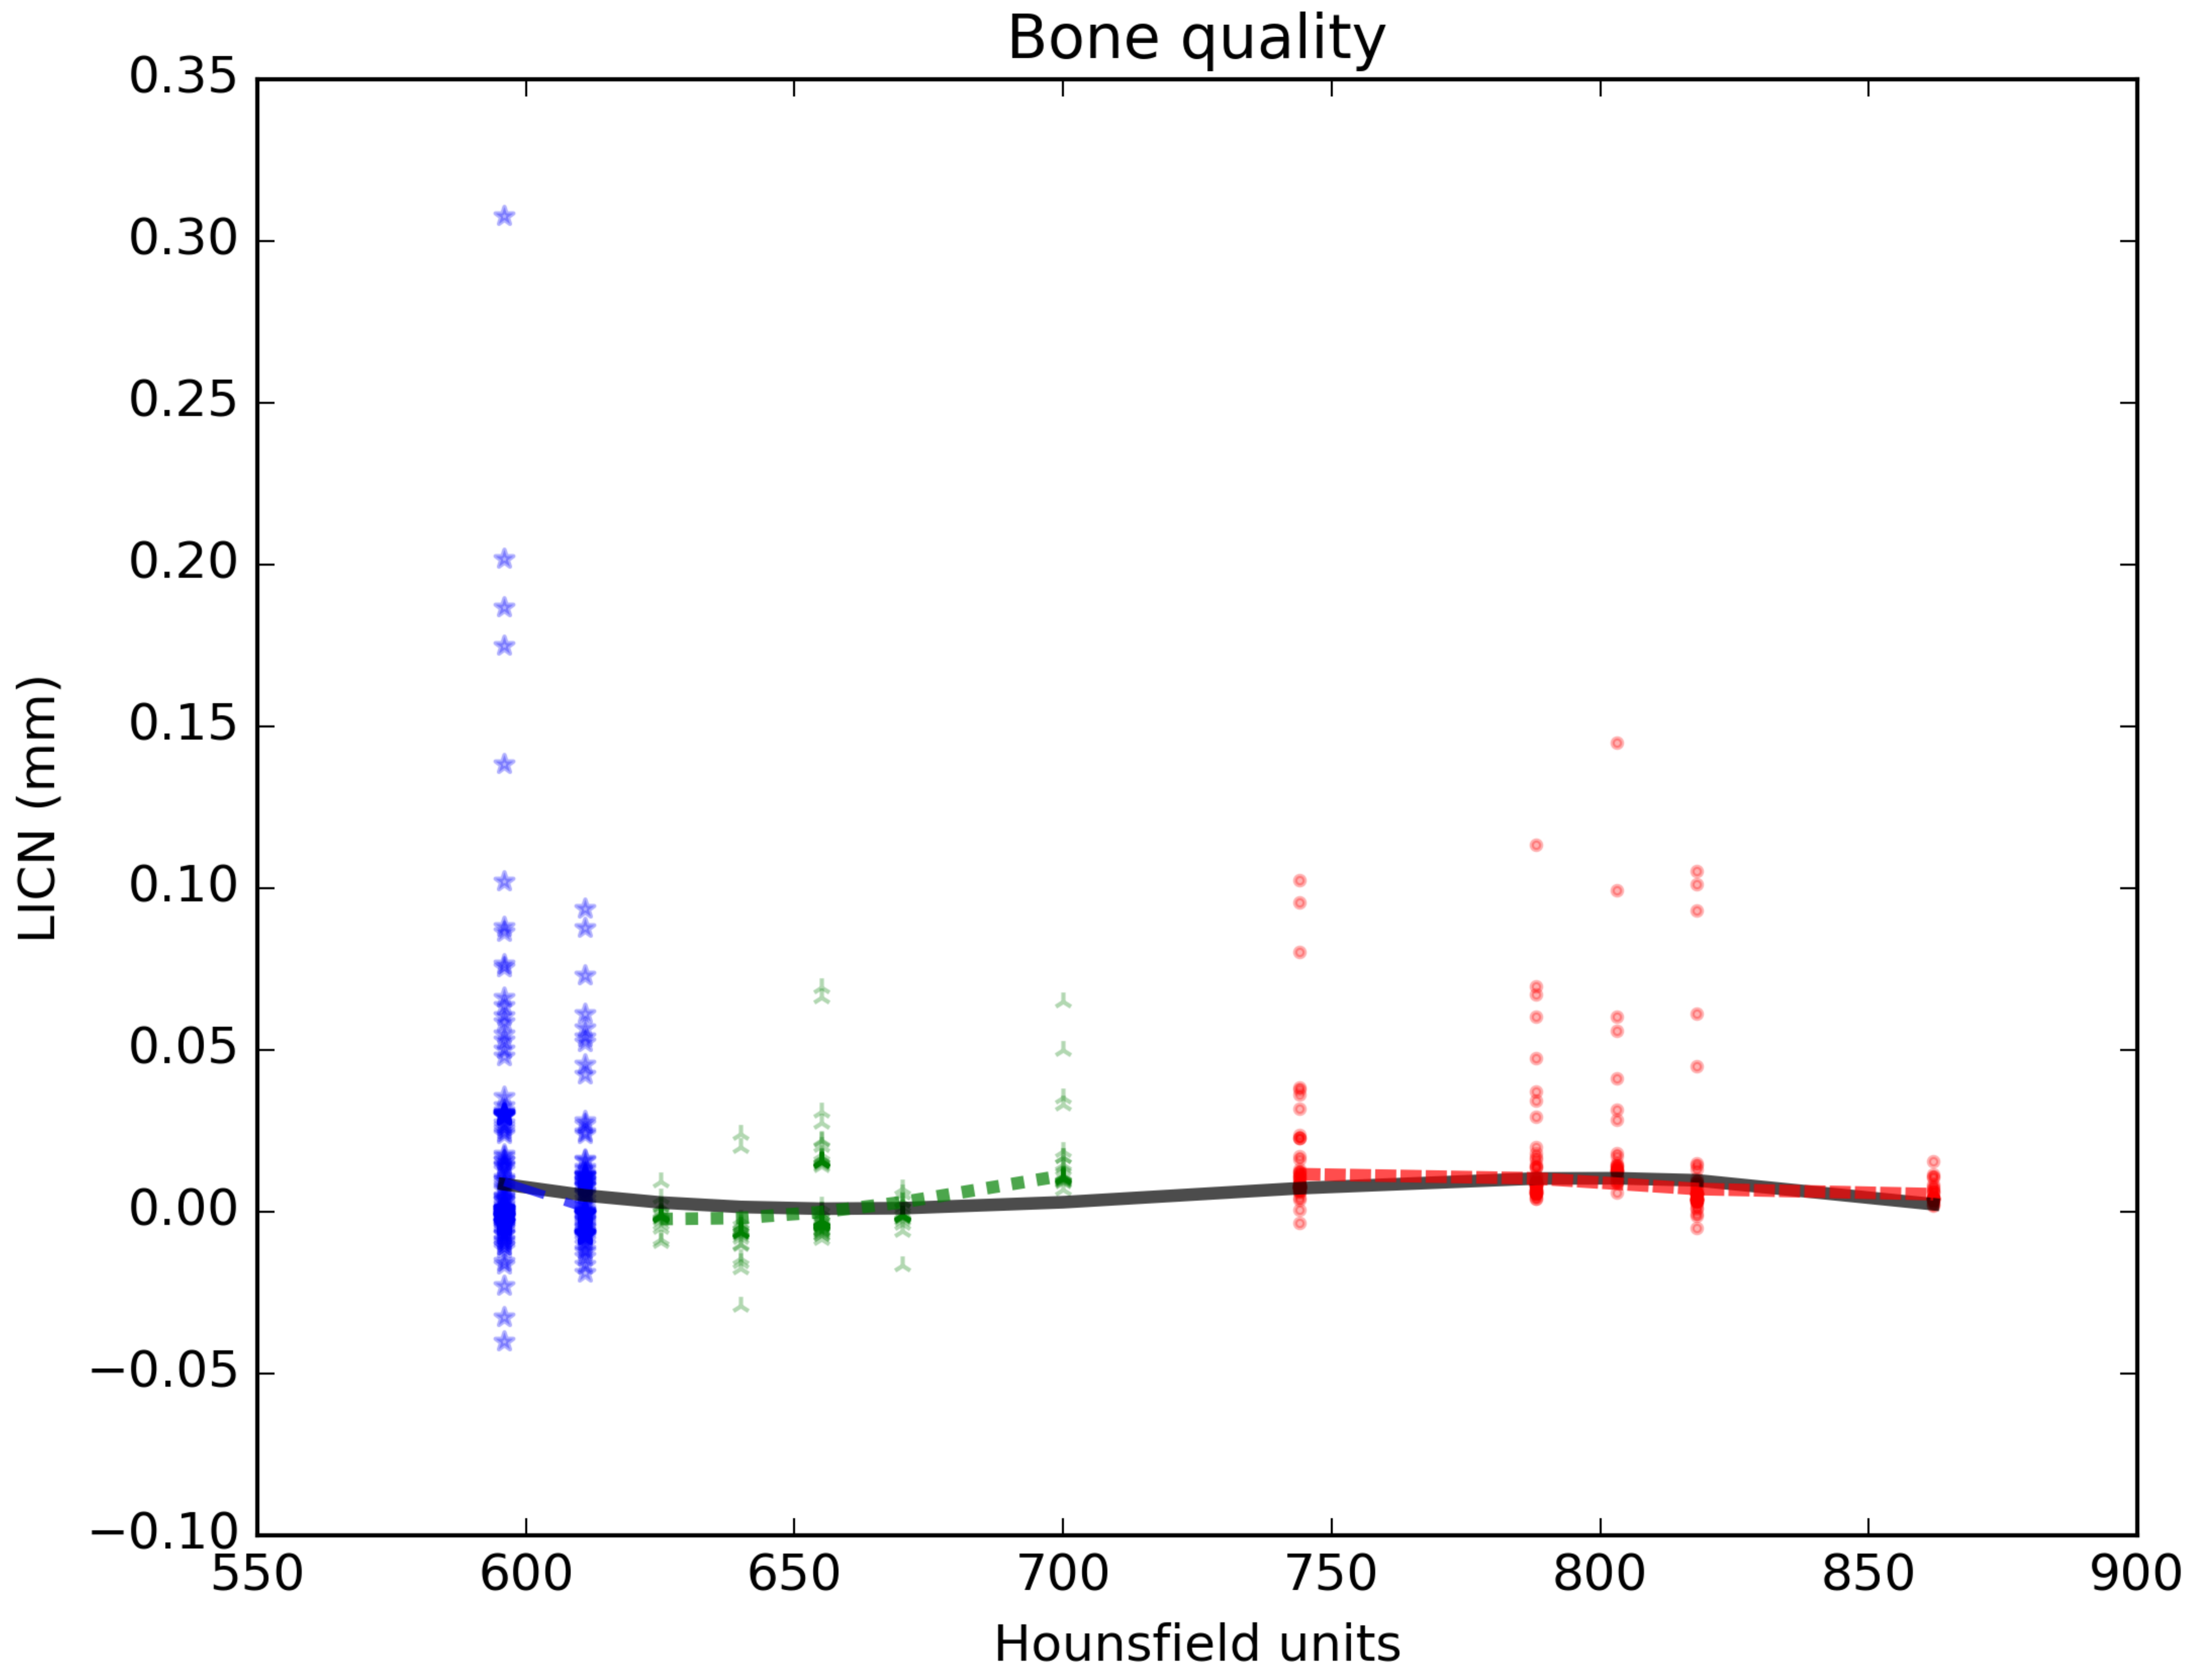

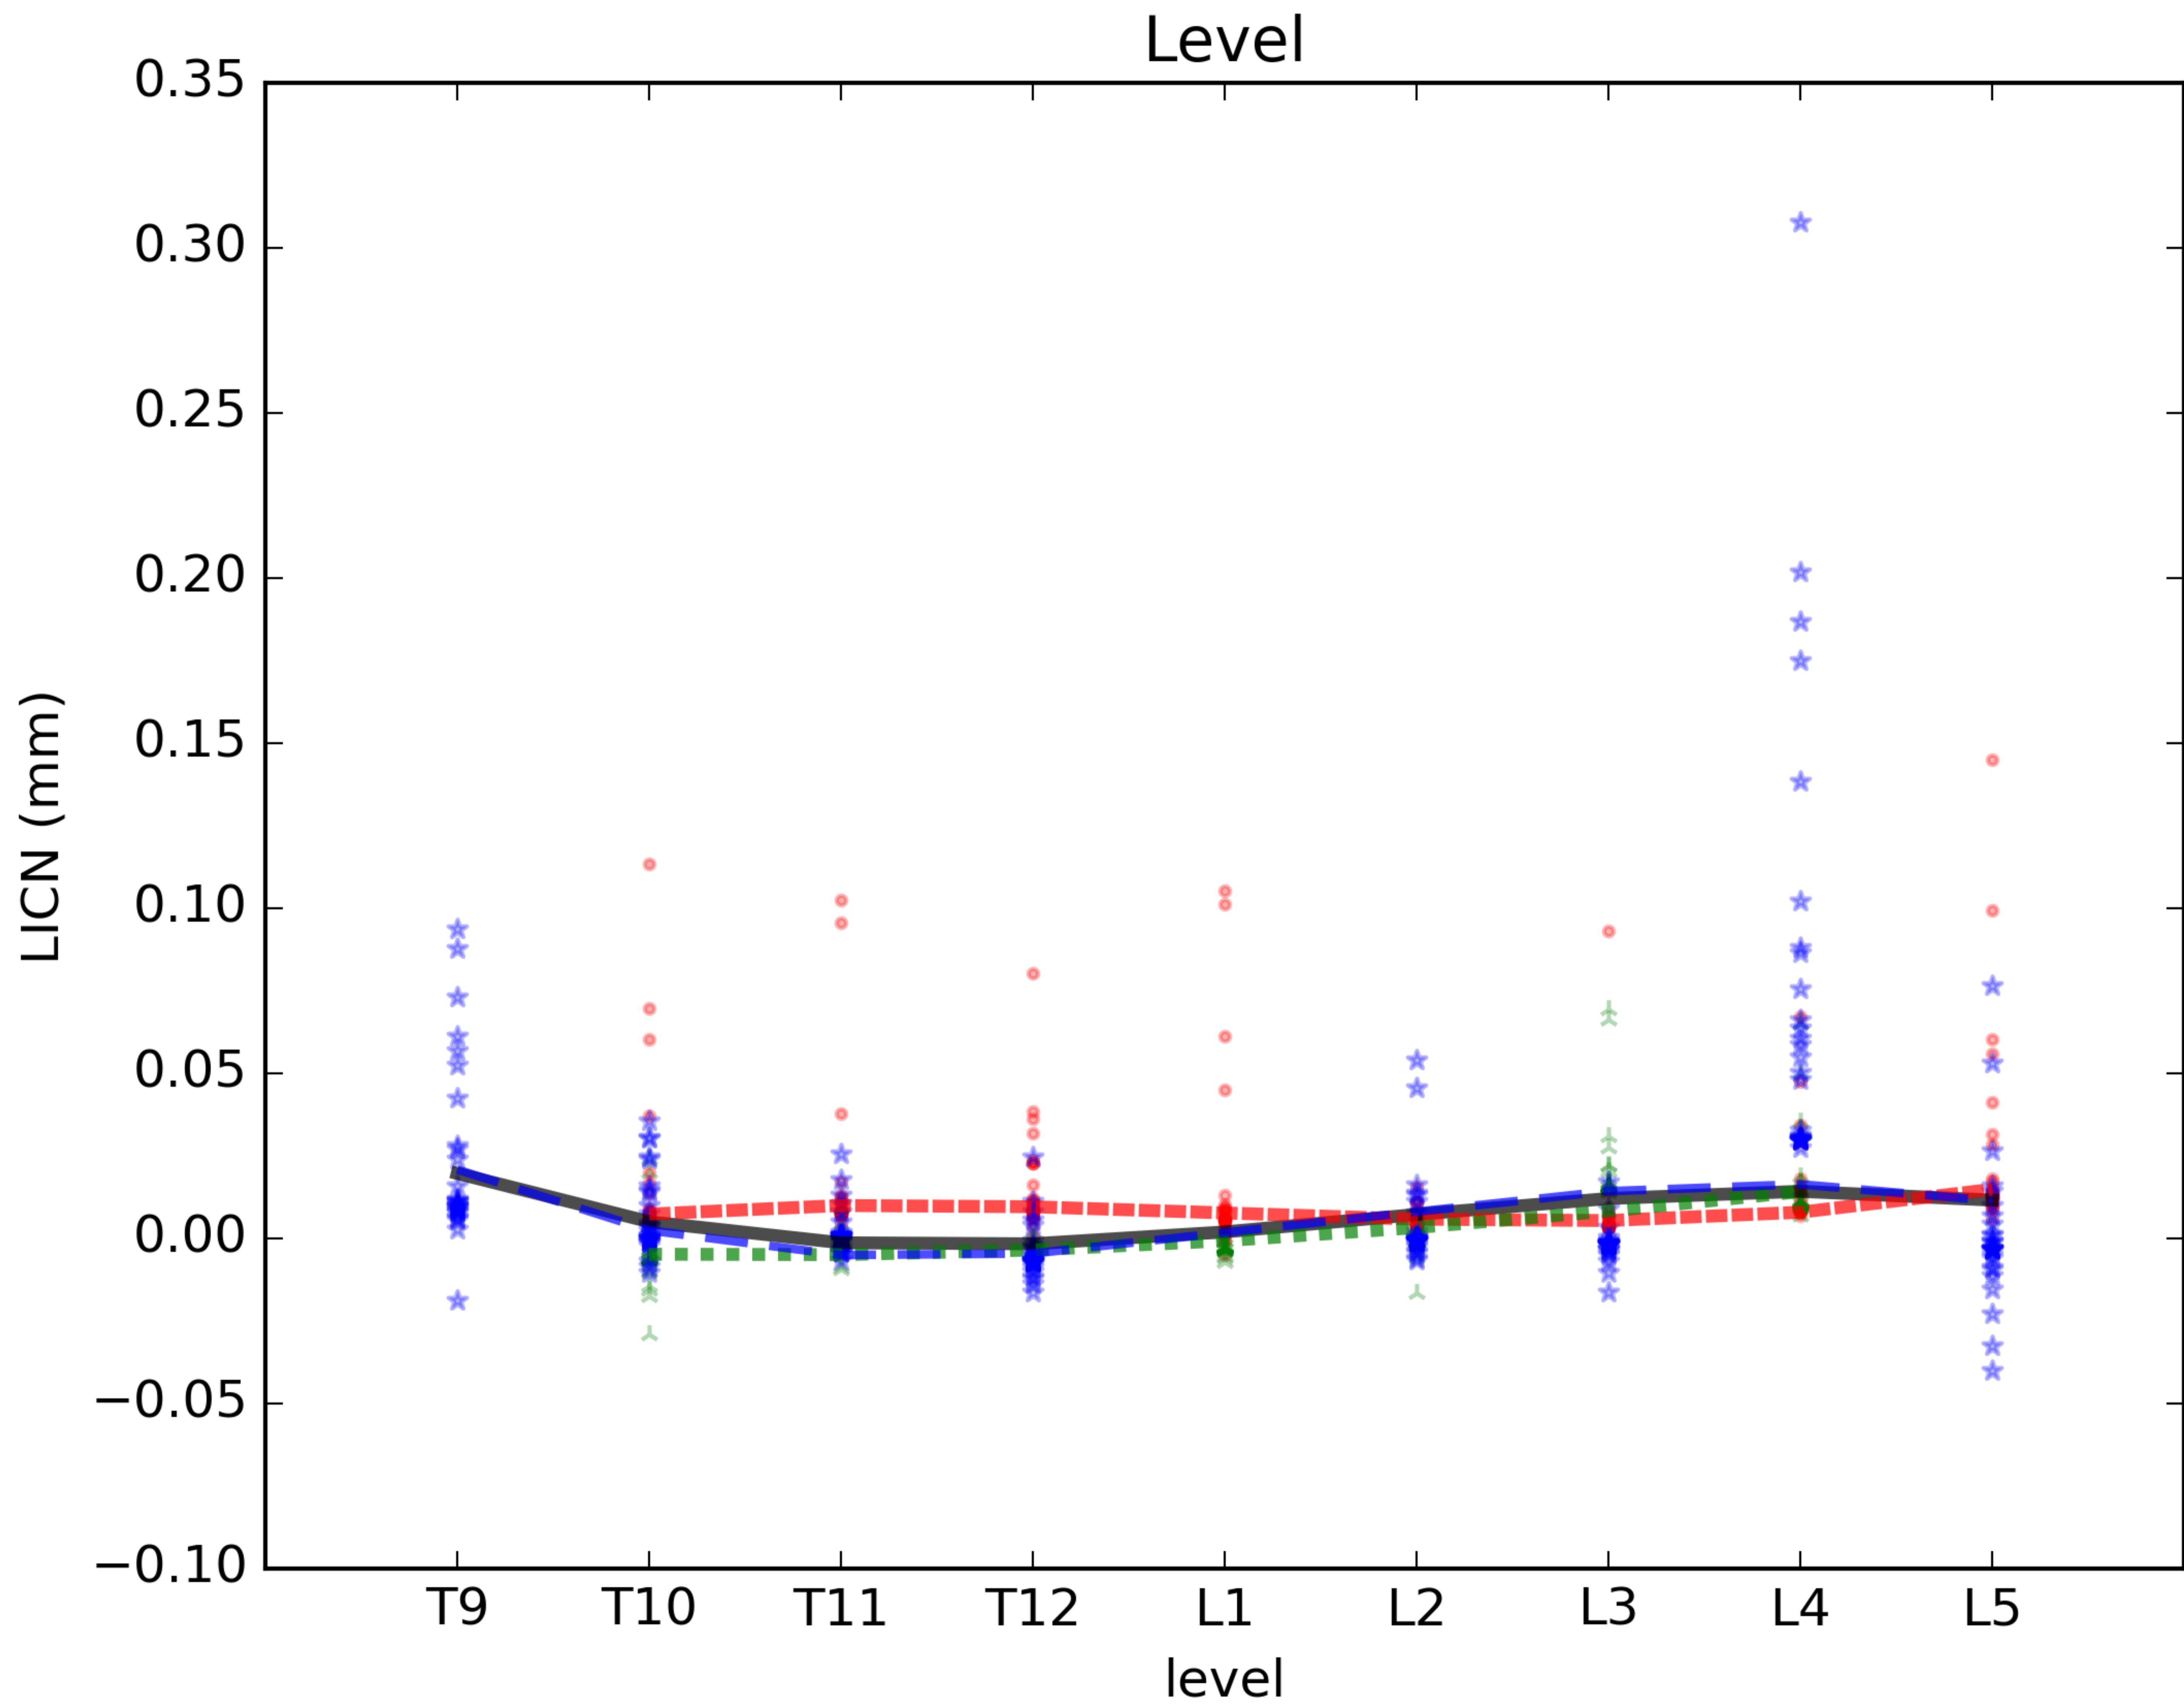

Supplement: mmc4.pdf [file mmc4.pdf]
